# Supplementary material
Source: publisher figshare collection journal article supplement (https://gsajournals.figshare.com/ndownloader/files/17768258)
Supplement: Supplementary file 1 [file 17768258]

## Sheet: SupplTable3_MGInames_June15
Table S2. Results of EdgeR analysis comparing gene expression levels of 16GsoT/T cerebellum (CB) and hippocampus (HC) to wild type (WT) at P14 and P35. All differentially expressed genes (DEGs) identified with false discovery rate (fdr) of 0.05 or less are shown. Column A=comparison, shows the brain region and developmental timepoint being compared between 16GsoT/T and WT animals Column B =NCBI37…
sample type	NCBI37.2 symbol	Input Type	New Symbol	logFC_trended_only_disp	logCPM_trended_only_disp	PValue_trended_only_disp	FDR_trended_only_disp	Name	Feature Type	Ensembl ID
P14_HC	2019-03-08	current symbol	March8	0.393972	6.4782	0.000236055	0.00951937	membrane-associated ring finger (C3HC4) 8	protein coding gene	ENSMUSG00000025702
P35_CB	2019-03-07	current symbol	March7	-0.644846	5.95105	1.24e-10	3.17e-09	membrane-associated ring finger (C3HC4) 7	protein coding gene	ENSMUSG00000026977
P35_CB	2019-09-02	current symbol	Sept2	-0.352605	6.73187	7.18e-05	0.000500937	septin 2	protein coding gene	ENSMUSG00000026276
P35_CB	2019-09-02	current symbol	Sept2	-0.352605	6.73187	7.18e-05	0.000500937	septin 2	protein coding gene	ENSMUSG00000116048
P35_CB	2019-09-05	current symbol	Sept5	0.249747	7.92135	0.0047702	0.0175668	septin 5	protein coding gene	ENSMUSG00000072214
P35_CB	2019-09-07	current symbol	Sept7	-0.423058	8.53851	4.21e-06	4.18e-05	septin 7	protein coding gene	ENSMUSG00000001833
P35_CB	100040852	old symbol	Gm3002	-2.51609	3.48229	1.8e-28	2.29e-26	predicted gene 3002	protein coding gene	ENSMUSG00000096793
P35_CB	0610007P08Rik	old symbol	Ercc6l2	-0.765638	5.16517	3.69e-10	8.4e-09	excision repair cross-complementing rodent repair deficiency, complementation group 6 like 2	protein coding gene	ENSMUSG00000021470
P35_CB	0610007P14Rik	old symbol	Erg28	0.239397	6.27041	0.0110423	0.0348566	ergosterol biosynthesis 28	protein coding gene	ENSMUSG00000021252
P35_CB	0610010F05Rik	current symbol	0610010F05Rik	-0.554908	5.68496	2.05e-07	2.8e-06	RIKEN cDNA 0610010F05 gene	protein coding gene	ENSMUSG00000042208
P35_CB	0610011L14Rik	old symbol	Aar2	0.426024	5.77484	3.66e-05	0.000279552	AAR2 splicing factor homolog	protein coding gene	ENSMUSG00000027628
P35_CB	0610030E20Rik	current symbol	0610030E20Rik	-0.569334	5.39049	6.79e-07	8.19e-06	RIKEN cDNA 0610030E20 gene	protein coding gene	ENSMUSG00000058706
P35_CB	0610037L13Rik	old symbol	Czib	-0.395034	4.69203	0.00437596	0.0163335	CXXC motif containing zinc binding protein	protein coding gene	ENSMUSG00000028608
P35_CB	0610040J01Rik	current symbol	0610040J01Rik	-0.569502	3.49089	0.00586137	0.0207758	RIKEN cDNA 0610040J01 gene	protein coding gene	ENSMUSG00000060512
P35_CB	1110002B05Rik	old symbol	Sptssa	-0.339252	4.87164	0.0117906	0.0367286	serine palmitoyltransferase, small subunit A	protein coding gene	ENSMUSG00000044408
P35_CB	1110008P14Rik	current symbol	1110008P14Rik	0.324729	5.01918	0.00873558	0.0288024	RIKEN cDNA 1110008P14 gene	protein coding gene	ENSMUSG00000039195
P35_CB	1110012D08Rik	old symbol	Tmem198b	-0.474092	4.71098	0.00061509	0.0031531	transmembrane protein 198b	protein coding gene	ENSMUSG00000047090
P35_CB	1110012J17Rik	old symbol	Mtcl1	0.317015	8.53549	0.000567818	0.00294662	microtubule crosslinking factor 1	protein coding gene	ENSMUSG00000052105
P35_CB	1110020G09Rik	old symbol	Nadk2	-0.242635	6.07039	0.0135368	0.0408834	NAD kinase 2, mitochondrial	protein coding gene	ENSMUSG00000022253
P35_CB	1110020P15Rik	old symbol	Uqcr10	0.339392	5.8904	0.000720993	0.00361748	ubiquinol-cytochrome c reductase, complex III subunit X	protein coding gene	ENSMUSG00000059534
P35_CB	1110021J02Rik	old symbol	Ccdc167	-0.284088	6.20188	0.00327684	0.012809	coiled-coil domain containing 167	protein coding gene	ENSMUSG00000024018
P35_CB	1110028C15Rik	old symbol	Kansl1l	-0.643235	4.81248	1.68e-06	1.85e-05	KAT8 regulatory NSL complex subunit 1-like	protein coding gene	ENSMUSG00000026004
P35_CB	1110034B05Rik	old symbol	Tyw5	-0.845276	3.26507	0.000135754	0.00086741	tRNA-yW synthesizing protein 5	protein coding gene	ENSMUSG00000048495
P14_HC	1110049B09Rik	old symbol	Cdhr3	1.58391	0.96304	3.02e-05	0.00186306	cadherin-related family member 3	protein coding gene	ENSMUSG00000035860
P35_HC	1110059M19Rik	old symbol	Prr32	2.12585	1.30354	0.000548295	0.0437463	proline rich 32	protein coding gene	ENSMUSG00000037086
P35_CB	1190007I07Rik	current symbol	1190007I07Rik	-1.20514	2.11712	0.00021858	0.00129991	RIKEN cDNA 1190007I07 gene	protein coding gene	ENSMUSG00000063320
P35_CB	1200014J11Rik	old symbol	Ncbp3	0.420593	5.06101	0.00071452	0.0035891	nuclear cap binding subunit 3	protein coding gene	ENSMUSG00000020783
P35_CB	1200014M14Rik	old symbol	Poc5	0.30138	5.6073	0.00531846	0.0191721	POC5 centriolar protein	protein coding gene	ENSMUSG00000021671
P35_CB	1200016B10Rik	old symbol	Swt1	-0.471814	4.03433	0.00571907	0.0203549	SWT1 RNA endoribonuclease homolog (S. cerevisiae)	protein coding gene	ENSMUSG00000052748
P35_CB	1300003B13Rik	old symbol	Zfp946	-1.10146	4.63883	9.96e-15	4.58e-13	zinc finger protein 946	protein coding gene	ENSMUSG00000071266
P14_HC	1500015O10Rik	current symbol	1500015O10Rik	0.952764	3.34247	3.38e-06	0.000302375	RIKEN cDNA 1500015O10 gene	protein coding gene	ENSMUSG00000026051
P35_CB	1500015O10Rik	current symbol	1500015O10Rik	-1.81283	3.67699	3.82e-19	2.77e-17	RIKEN cDNA 1500015O10 gene	protein coding gene	ENSMUSG00000026051
P35_HC	1500015O10Rik	current symbol	1500015O10Rik	2.32847	2.91071	2.68e-09	1.09e-06	RIKEN cDNA 1500015O10 gene	protein coding gene	ENSMUSG00000026051
P35_CB	1500017E21Rik	old symbol	Hectd2os	-0.775236	2.61189	0.00492262	0.0180295	Hectd2, opposite strand	antisense lncRNA gene	ENSMUSG00000087579
P35_CB	1500031L02Rik	old symbol	Cep19	-0.526657	4.66389	0.000131872	0.000847832	centrosomal protein 19	protein coding gene	ENSMUSG00000035790
P35_CB	1500032L24Rik	old symbol	Smdt1	0.339684	5.96419	0.000620084	0.00317628	single-pass membrane protein with aspartate rich tail 1	protein coding gene	ENSMUSG00000022452
P35_CB	1520402A15Rik	old symbol	Lurap1	0.481057	5.60401	8.7e-06	7.88e-05	leucine rich adaptor protein 1	protein coding gene	ENSMUSG00000028701
P35_CB	1600002K03Rik	current symbol	1600002K03Rik	-1.03847	1.70269	0.00474207	0.0174822	RIKEN cDNA 1600002K03 gene	protein coding gene	ENSMUSG00000035595
P35_CB	1600012H06Rik	current symbol	1600012H06Rik	-0.520191	4.69443	0.000158585	0.000983914	RIKEN cDNA 1600012H06 gene	protein coding gene	ENSMUSG00000050088
P35_CB	1600014C10Rik	current symbol	1600014C10Rik	-0.307266	5.33426	0.00730375	0.0249163	RIKEN cDNA 1600014C10 gene	protein coding gene	ENSMUSG00000054676
P35_CB	1600027N09Rik	old symbol	Mrgbp	-0.588336	3.51464	0.00372246	0.0142737	MRG/MORF4L binding protein	protein coding gene	ENSMUSG00000027569
P35_CB	1700007I08Rik	old symbol	Actl10	-1.94245	1.12809	3.81e-05	0.000289165	actin-like 10	protein coding gene	ENSMUSG00000078129
P14_HC	1700009P17Rik	old symbol	Cfap126	1.44397	1.04127	8.73e-05	0.00425209	cilia and flagella associated protein 126	protein coding gene	ENSMUSG00000026649
P35_CB	1700012B15Rik	old symbol	Rab10os	-0.53608	4.21778	0.0008601	0.00418472	RAB10, member RAS oncogene family, opposite strand	antisense lncRNA gene	ENSMUSG00000079179
P35_CB	1700020C11Rik	old symbol	Mtfp1	0.298939	5.07325	0.0165065	0.0482315	mitochondrial fission process 1	protein coding gene	ENSMUSG00000004748
P14_HC	1700020I14Rik	old symbol	Oip5os1	0.669899	6.2806	7.28e-10	1.8e-07	Opa interacting protein 5, opposite strand 1	lincRNA gene	ENSMUSG00000085438
P35_CB	1700020I14Rik	old symbol	Oip5os1	-0.308026	7.32204	0.000291323	0.00166495	Opa interacting protein 5, opposite strand 1	lincRNA gene	ENSMUSG00000085438
P35_CB	1700020O03Rik	old symbol	Gpatch2l	0.300907	5.9523	0.00256134	0.0104075	G patch domain containing 2 like	protein coding gene	ENSMUSG00000021254
P35_CB	1700025G04Rik	current symbol	1700025G04Rik	0.225781	7.34399	0.00876319	0.0288723	RIKEN cDNA 1700025G04 gene	protein coding gene	ENSMUSG00000032666
P14_HC	1700027L20Rik	old symbol	Prss56	-1.28292	0.52276	0.00173279	0.0419619	protease, serine 56	protein coding gene	ENSMUSG00000036480
P35_CB	1700029I01Rik	old symbol	Znf41-ps	-0.938238	1.86005	0.00726697	0.0248096	ZNF41, pseudogene	pseudogene	ENSMUSG00000084350
P35_CB	1700029J07Rik	current symbol	1700029J07Rik	-1.34601	1.454	0.000775005	0.00383999	RIKEN cDNA 1700029J07 gene	protein coding gene	ENSMUSG00000071103
P35_CB	1700034H14Rik	old symbol	Timm21	-0.796851	3.93527	7.88e-06	7.25e-05	translocase of inner mitochondrial membrane 21	protein coding gene	ENSMUSG00000024645
P35_CB	1700047M11Rik	current symbol	1700047M11Rik	-1.28395	2.82248	8.06e-07	9.54e-06	RIKEN cDNA 1700047M11 gene	lincRNA gene	ENSMUSG00000100147
P14_CB	1700048O20Rik	current symbol	1700048O20Rik	0.682395	3.37932	2.45e-05	0.00228195	RIKEN cDNA 1700048O20 gene	lincRNA gene	ENSMUSG00000043773
P35_CB	1700048O20Rik	current symbol	1700048O20Rik	-0.611675	3.02056	0.0111866	0.0352378	RIKEN cDNA 1700048O20 gene	lincRNA gene	ENSMUSG00000043773
P35_CB	1700066J24Rik	old symbol	Fam219aos	0.402329	5.11487	0.000959458	0.00458725	family with sequence similarity 219, member A, opposite strand	antisense lncRNA gene	ENSMUSG00000036162
P35_CB	1700066M21Rik	current symbol	1700066M21Rik	-0.453392	4.44827	0.0021484	0.00902609	RIKEN cDNA 1700066M21 gene	protein coding gene	ENSMUSG00000038323
P14_HC	1700084C01Rik	old symbol	Ccdc190	0.72058	3.77584	8.18e-05	0.00401008	coiled-coil domain containing 190	protein coding gene	ENSMUSG00000070532
P35_CB	1700094D03Rik	current symbol	1700094D03Rik	-0.699901	3.02527	0.00366797	0.0141169	RIKEN cDNA 1700094D03 gene	protein coding gene
P35_CB	1700109H08Rik	current symbol	1700109H08Rik	-1.49163	2.17033	3.15e-06	3.25e-05	RIKEN cDNA 1700109H08 gene	protein coding gene	ENSMUSG00000008307
P14_HC	1700112M01Rik	old symbol	Usp46os2	0.62163	3.66001	0.000928428	0.0260787	ubiquitin specific peptidase 46, opposite strand 2	lncRNA gene	ENSMUSG00000086234
P35_CB	1700113I22Rik	old symbol	Ptges3l	0.936128	1.83315	0.00794192	0.0267348	prostaglandin E synthase 3 like	protein coding gene	ENSMUSG00000097487
P35_CB	1810007M14Rik	old symbol	Paxbp1	-1.10884	6.93967	3.09e-37	5.95e-35	PAX3 and PAX7 binding protein 1	protein coding gene	ENSMUSG00000022974
P35_CB	1810008A18Rik	old symbol	Fam207a	0.47933	5.42684	2.16e-05	0.000175222	family with sequence similarity 207, member A	protein coding gene	ENSMUSG00000032977
P14_HC	1810011O10Rik	old symbol	Tcim	-1.23889	1.6173	9.46e-05	0.00457149	transcriptional and immune response regulator	protein coding gene	ENSMUSG00000056313
P35_CB	1810043H04Rik	old symbol	Ndufaf8	0.65722	2.93653	0.00668257	0.0231486	NADH:ubiquinone oxidoreductase complex assembly factor 8	protein coding gene	ENSMUSG00000078572
P35_CB	1810046J19Rik	old symbol	Mien1	0.478374	5.25248	5.04e-05	0.000367619	migration and invasion enhancer 1	protein coding gene	ENSMUSG00000002580
P35_CB	1810074P20Rik	old symbol	Ufl1	-0.393805	5.35834	0.000611841	0.00314002	UFM1 specific ligase 1	protein coding gene	ENSMUSG00000040359
P14_HC	2010002N04Rik	old symbol	Smim3	-0.810122	4.81242	5.97e-09	1.2e-06	small integral membrane protein 3	protein coding gene	ENSMUSG00000038059
P35_CB	2010015L04Rik	old symbol	Cfap74	-0.467385	3.77287	0.0114634	0.0359501	cilia and flagella associated protein 74	protein coding gene	ENSMUSG00000078490
P35_CB	2010106G01Rik	old symbol	Sppl2a	-0.666618	5.64309	7.42e-10	1.61e-08	signal peptide peptidase like 2A	protein coding gene	ENSMUSG00000027366
P35_CB	2010111I01Rik	old symbol	Aopep	-0.896649	4.44545	1.95e-09	3.98e-08	aminopeptidase O	protein coding gene	ENSMUSG00000021458
P35_CB	2010300C02Rik	current symbol	2010300C02Rik	0.469671	4.80691	0.000468995	0.00250515	RIKEN cDNA 2010300C02 gene	protein coding gene	ENSMUSG00000026090
P35_CB	2210012G02Rik	old symbol	Tceanc2	0.369629	4.43392	0.0127312	0.0389652	transcription elongation factor A (SII) N-terminal and central domain containing 2	protein coding gene	ENSMUSG00000028619
P35_CB	2210016L21Rik	current symbol	2210016L21Rik	0.258027	6.43679	0.00503026	0.0183391	RIKEN cDNA 2210016L21 gene	protein coding gene	ENSMUSG00000029559
P35_CB	2310003C23Rik	old symbol	Gid8	0.284979	5.52337	0.00939482	0.0306094	GID complex subunit 8	protein coding gene	ENSMUSG00000027573
P35_CB	2310015A10Rik	current symbol	2310015A10Rik	-0.674439	4.43071	6.93e-06	6.49e-05	RIKEN cDNA 2310015A10 gene	lncRNA gene	ENSMUSG00000097729
P35_CB	2310016E02Rik	old symbol	Ost4	0.367407	4.75224	0.00626636	0.0219836	oligosaccharyltransferase complex subunit 4 (non-catalytic)	protein coding gene	ENSMUSG00000038803
P35_CB	2310016M24Rik	old symbol	Cox14	0.456919	6.31727	1e-06	1.16e-05	cytochrome c oxidase assembly protein 14	protein coding gene	ENSMUSG00000023020
P14_HC	2310021P13Rik	old symbol	Zswim8	-0.350243	7.01298	0.000832733	0.0241232	zinc finger SWIM-type containing 8	protein coding gene	ENSMUSG00000021819
P35_CB	2310022A10Rik	current symbol	2310022A10Rik	0.37229	4.96472	0.00355792	0.0137444	RIKEN cDNA 2310022A10 gene	protein coding gene	ENSMUSG00000049643
P35_CB	2310028H24Rik	old symbol	Fam219a	0.265202	6.73981	0.00270352	0.010903	family with sequence similarity 219, member A	protein coding gene	ENSMUSG00000028439
P35_CB	2310030N02Rik	old symbol	Ndufaf6	-0.970273	2.6162	0.000561401	0.00291894	NADH:ubiquinone oxidoreductase complex assembly factor 6	protein coding gene	ENSMUSG00000050323
P35_CB	2310035C23Rik	old symbol	Relch	-0.291944	6.65312	0.00110165	0.00513393	RAB11 binding and LisH domain, coiled-coil and HEAT repeat containing	protein coding gene	ENSMUSG00000026319
P35_CB	2310042D19Rik	old symbol	Perm1	-0.951771	2.31461	0.00137209	0.00617851	PPARGC1 and ESRR induced regulator, muscle 1	protein coding gene	ENSMUSG00000078486
P35_CB	2310044H10Rik	old symbol	Emc10	-0.273591	7.22562	0.00130773	0.00591836	ER membrane protein complex subunit 10	protein coding gene	ENSMUSG00000008140
P35_CB	2310047B19Rik	old symbol	Swsap1	0.416041	4.27358	0.00855051	0.0283238	SWIM type zinc finger 7 associated protein 1	protein coding gene	ENSMUSG00000051238
P35_CB	2310057J16Rik	old symbol	Camsap3	0.398207	4.97834	0.00165551	0.00723255	calmodulin regulated spectrin-associated protein family, member 3	protein coding gene	ENSMUSG00000044433
P35_CB	2410001C21Rik	old symbol	Rtf2	0.294288	6.39648	0.00147489	0.00656689	replication termination factor 2	protein coding gene	ENSMUSG00000027502
P14_HC	2410004P03Rik	current symbol	2410004P03Rik	1.71368	0.802298	2.02e-05	0.00130884	RIKEN cDNA 2410004P03 gene	protein coding gene	ENSMUSG00000071398
P35_CB	2410015M20Rik	old symbol	Micos13	0.366025	5.06649	0.00278763	0.011182	mitochondrial contact site and cristae organizing system subunit 13	protein coding gene	ENSMUSG00000049760
P35_CB	2410042D21Rik	old symbol	Katnbl1	-0.72247	4.49019	9.23e-07	1.08e-05	katanin p80 subunit B like 1	protein coding gene	ENSMUSG00000027132
P35_CB	2410089E03Rik	old symbol	Cplane1	-0.680895	6.1768	1.48e-12	4.98e-11	ciliogenesis and planar polarity effector 1	protein coding gene	ENSMUSG00000039801
P35_CB	2410127L17Rik	old symbol	Carnmt1	-0.541109	3.69982	0.00385622	0.0146946	carnosine N-methyltransferase 1	protein coding gene	ENSMUSG00000024726
P35_CB	2410129H14Rik	old symbol	Mzt1	-0.315769	6.25342	0.000903371	0.0043622	mitotic spindle organizing protein 1	protein coding gene	ENSMUSG00000033186
P35_CB	2410137F16Rik	old symbol	Srrm4os	-2.28155	2.44261	5.6e-13	2.03e-11	serine/arginine repetitive matrix 4, opposite strand	antisense lncRNA gene	ENSMUSG00000086219
P35_CB	2510003E04Rik	old symbol	Kif1bp	0.279239	7.12482	0.00110912	0.00515273	KIF1 binding protein	protein coding gene	ENSMUSG00000036955
P35_CB	2510006D16Rik	old symbol	Tmem234	-0.299667	5.06396	0.01609	0.0472192	transmembrane protein 234	protein coding gene	ENSMUSG00000028797
P35_CB	2510012J08Rik	old symbol	Cactin	0.349224	5.03159	0.00552432	0.0197977	cactin, spliceosome C complex subunit	protein coding gene	ENSMUSG00000034889
P35_CB	2510027J23Rik	old symbol	Rwdd3	-0.806978	2.18823	0.0108068	0.0343545	RWD domain containing 3	protein coding gene	ENSMUSG00000028133
P35_CB	2510049J12Rik	old symbol	Mkrn2os	-0.978756	1.56768	0.0119627	0.0371614	makorin, ring finger protein 2, opposite strand	protein coding gene	ENSMUSG00000068011
P35_CB	2600006K01Rik	current symbol	2600006K01Rik	-1.54168	1.16001	0.000815605	0.00400291	RIKEN cDNA 2600006K01 gene	antisense lncRNA gene	ENSMUSG00000039798
P35_CB	2610008E11Rik	current symbol	2610008E11Rik	-0.75583	5.23234	3.21e-10	7.42e-09	RIKEN cDNA 2610008E11 gene	protein coding gene	ENSMUSG00000060301
P35_CB	2610015P09Rik	old symbol	Ccdc191	-0.712154	2.37922	0.0164821	0.0481812	coiled-coil domain containing 191	protein coding gene	ENSMUSG00000022701
P35_CB	2610021A01Rik	current symbol	2610021A01Rik	-0.506573	4.68665	0.000233462	0.00137567	RIKEN cDNA 2610021A01 gene	protein coding gene	ENSMUSG00000091474
P35_CB	2610030H06Rik	old symbol	Vma21	-0.297875	6.66023	0.000837572	0.00409581	VMA21 vacuolar H+-ATPase homolog (S. cerevisiae)	protein coding gene	ENSMUSG00000073131
P35_HC	2610100L16Rik	old symbol	Mir124-2hg	1.52705	2.32222	0.000433706	0.0365027	Mir124-2 host gene (non-protein coding)	lincRNA gene	ENSMUSG00000100252
P35_CB	2610101N10Rik	old symbol	U2surp	-0.280271	6.92826	0.00110861	0.0051521	U2 snRNP-associated SURP domain containing	protein coding gene	ENSMUSG00000032407
P35_CB	2610203C20Rik	old symbol	Mir100hg	-0.384886	4.76087	0.00293019	0.0116671	Mir100 Mirlet7a-2 Mir125b-1 cluster host gene	lncRNA gene	ENSMUSG00000074415
P35_HC	2610203C20Rik	old symbol	Mir100hg	0.995411	5.42198	3.05e-08	1.05e-05	Mir100 Mirlet7a-2 Mir125b-1 cluster host gene	lncRNA gene	ENSMUSG00000074415
P14_CB	2610301F02Rik	old symbol	Ccdc141	-0.545747	4.58095	6.39e-06	0.000728527	coiled-coil domain containing 141	protein coding gene	ENSMUSG00000044033
P35_CB	2610301F02Rik	old symbol	Ccdc141	-1.17299	3.73791	8.72e-10	1.88e-08	coiled-coil domain containing 141	protein coding gene	ENSMUSG00000044033
P35_CB	2610301G19Rik	old symbol	Ccar2	0.325254	6.71551	0.000232722	0.00137191	cell cycle activator and apoptosis regulator 2	protein coding gene	ENSMUSG00000033712
P35_CB	2610507B11Rik	current symbol	2610507B11Rik	-0.218615	8.37467	0.0161396	0.0473441	RIKEN cDNA 2610507B11 gene	protein coding gene	ENSMUSG00000010277
P14_HC	2610507I01Rik	current symbol	2610507I01Rik	-0.947236	3.63717	6.02e-07	6.96e-05	RIKEN cDNA 2610507I01 gene	lncRNA gene	ENSMUSG00000085882
P14_CB	2610507I01Rik	current symbol	2610507I01Rik	-1.0321	3.4005	7.73e-11	2.32e-08	RIKEN cDNA 2610507I01 gene	lncRNA gene	ENSMUSG00000085882
P35_CB	2610507I01Rik	current symbol	2610507I01Rik	-0.7711	4.03967	7.61e-06	7.04e-05	RIKEN cDNA 2610507I01 gene	lncRNA gene	ENSMUSG00000085882
P35_CB	2700007P21Rik	old symbol	Arl14ep	-0.285964	5.55387	0.00838843	0.0278966	ADP-ribosylation factor-like 14 effector protein	protein coding gene	ENSMUSG00000027122
P35_CB	2700023E23Rik	old symbol	Dancr	-1.15436	1.91078	0.000896987	0.0043371	differentiation antagonizing non-protein coding RNA	lncRNA gene	ENSMUSG00000106943
P35_CB	2700046G09Rik	current symbol	2700046G09Rik	-1.06809	1.69198	0.00425725	0.0159656	RIKEN cDNA 2700046G09 gene	bidirectional promoter lncRNA gene	ENSMUSG00000097787
P35_CB	2700089E24Rik	old symbol	Smim10l1	-0.297032	7.43052	0.000525959	0.00276451	small integral membrane protein 10 like 1	protein coding gene	ENSMUSG00000072704
P35_CB	2700097O09Rik	current symbol	2700097O09Rik	-0.780644	2.58071	0.00512474	0.0185881	RIKEN cDNA 2700097O09 gene	protein coding gene	ENSMUSG00000062198
P35_CB	2810008D09Rik	old symbol	Snhg20	-1.3929	3.68177	2.02e-12	6.61e-11	small nucleolar RNA host gene 20	lincRNA gene	ENSMUSG00000086859
P35_CB	2810008M24Rik	old symbol	Smim15	-0.442919	5.58955	4.93e-05	0.000361133	small integral membrane protein 15	protein coding gene	ENSMUSG00000071180
P35_CB	2810011L19Rik	old symbol	Tunar	0.460289	6.19433	1.44e-06	1.61e-05	Tcl1 upstream neural differentiation associated RNA	lincRNA gene	ENSMUSG00000097929
P35_CB	2810021G02Rik	old symbol	Zfp931	-0.667454	2.6953	0.0115704	0.036252	zinc finger protein 931	protein coding gene	ENSMUSG00000078861
P35_CB	2810026P18Rik	old symbol	Snhg5	-0.952855	2.71943	0.000390935	0.00215181	small nucleolar RNA host gene 5	lncRNA gene	ENSMUSG00000097195
P35_CB	2810030E01Rik	old symbol	Skida1	-0.621439	3.55898	0.0018269	0.00785905	SKI/DACH domain containing 1	protein coding gene	ENSMUSG00000054074
P35_CB	2810046L04Rik	old symbol	Proser1	0.353828	5.41682	0.00211879	0.00891557	proline and serine rich 1	protein coding gene	ENSMUSG00000049504
P35_CB	2810403A07Rik	old symbol	Khdc4	-0.696273	6.49796	3.54e-14	1.55e-12	KH domain containing 4, pre-mRNA splicing factor	protein coding gene	ENSMUSG00000028060
P35_CB	2810405K02Rik	old symbol	Prxl2b	0.408788	5.80445	7.26e-05	0.000505404	peroxiredoxin like 2B	protein coding gene	ENSMUSG00000029059
P35_CB	2810408P10Rik	old symbol	Zfp933	-0.627931	4.42199	2.2e-05	0.000177597	zinc finger protein 933	protein coding gene	ENSMUSG00000059423
P35_CB	2810410L24Rik	current symbol	2810410L24Rik	-1.15847	2.9066	4e-06	4e-05	RIKEN cDNA 2810410L24 gene	lncRNA gene	ENSMUSG00000075389
P14_CB	2810417H13Rik	old symbol	Pclaf	0.63775	3.36701	8.89e-05	0.00648812	PCNA clamp associated factor	protein coding gene	ENSMUSG00000040204
P35_CB	2810453I06Rik	old symbol	Fam220a	0.295798	5.53184	0.00708244	0.0242931	family with sequence similarity 220, member A	protein coding gene	ENSMUSG00000083012
P35_CB	2810453I06Rik	old symbol	Fam220a	0.295798	5.53184	0.00708244	0.0242931	family with sequence similarity 220, member A	protein coding gene	ENSMUSG00000118332
P14_HC	2810459M11Rik	current symbol	2810459M11Rik	0.652928	4.18108	6.88e-05	0.00353485	RIKEN cDNA 2810459M11 gene	protein coding gene	ENSMUSG00000026227
P35_CB	2810474O19Rik	old symbol	Resf1	-0.434776	4.32774	0.00559941	0.0200295	retroelement silencing factor 1	protein coding gene	ENSMUSG00000032712
P35_CB	2900002K06Rik	old symbol	Rbm3os	-0.703941	4.74472	3.17e-07	4.14e-06	RNA binding motif protein 3, opposite strand	antisense lncRNA gene	ENSMUSG00000055188
P35_CB	2900006K08Rik	old symbol	Bbof1	-0.604756	3.17916	0.00804912	0.0270147	basal body orientation factor 1	protein coding gene	ENSMUSG00000057265
P35_CB	2900010M23Rik	old symbol	Uqcc2	0.407591	5.40779	0.000293959	0.00167788	ubiquinol-cytochrome c reductase complex assembly factor 2	protein coding gene	ENSMUSG00000024208
P35_CB	2900011O08Rik	old symbol	Bmerb1	0.305136	6.78964	0.000446429	0.00240943	bMERB domain containing 1	protein coding gene	ENSMUSG00000044117
P35_CB	2900064A13Rik	old symbol	Emc7	-0.328046	6.25493	0.000520396	0.00274169	ER membrane protein complex subunit 7	protein coding gene	ENSMUSG00000055943
P35_CB	2900092E17Rik	old symbol	Pagr1a	-0.959219	7.21066	5.22e-29	6.76e-27	PAXIP1 associated glutamate rich protein 1A	protein coding gene	ENSMUSG00000030680
P35_CB	3000002C10Rik	current symbol	3000002C10Rik	-0.974984	1.47926	0.0131586	0.0399559	RIKEN cDNA 3000002C10 gene	pseudogene	ENSMUSG00000070282
P14_HC	3110035E14Rik	old symbol	Vxn	0.587285	8.29217	1.47e-07	2.02e-05	vexin	protein coding gene	ENSMUSG00000067879
P35_CB	3110048L19Rik	old symbol	Zfp942	-1.28504	4.03517	2.49e-13	9.5e-12	zinc finger protein 942	protein coding gene	ENSMUSG00000071267
P35_CB	3110052M02Rik	old symbol	Zfp983	-0.605731	4.22422	0.000145222	0.000916614	zinc finger protein 983	protein coding gene	ENSMUSG00000035868
P35_CB	3110056K07Rik	current symbol	3110056K07Rik	-0.913654	2.99546	0.000174868	0.00107162	RIKEN cDNA 3110056K07 gene	lncRNA gene	ENSMUSG00000085622
P35_CB	3110056O03Rik	old symbol	Sppl2b	-0.403579	5.76278	0.000118887	0.000777318	signal peptide peptidase like 2B	protein coding gene	ENSMUSG00000035206
P35_CB	3110057O12Rik	old symbol	Abhd18	-0.559188	3.72876	0.00320185	0.0125669	abhydrolase domain containing 18	protein coding gene	ENSMUSG00000037818
P35_CB	3632451O06Rik	old symbol	Armh4	0.290688	6.90095	0.000779371	0.00385737	armadillo-like helical domain containing 4	protein coding gene	ENSMUSG00000036242
P35_CB	3632454L22Rik	current symbol	3632454L22Rik	-1.08585	2.67359	6.02e-05	0.00043028	RIKEN cDNA 3632454L22 gene	lncRNA gene	ENSMUSG00000089759
P35_CB	3830406C13Rik	current symbol	3830406C13Rik	-0.366493	4.28894	0.0171077	0.0497006	RIKEN cDNA 3830406C13 gene	protein coding gene	ENSMUSG00000033111
P35_CB	3830431G21Rik	old symbol	Plekhd1	0.223774	6.79101	0.0100124	0.0323167	pleckstrin homology domain containing, family D (with coiled-coil domains) member 1	protein coding gene	ENSMUSG00000066438
P35_CB	4430402I18Rik	current symbol	4430402I18Rik	-0.628135	3.00722	0.00951761	0.0309569	RIKEN cDNA 4430402I18 gene	protein coding gene	ENSMUSG00000064202
P14_HC	4632415L05Rik	current symbol	4632415L05Rik	0.450514	5.00511	0.000707724	0.0215477	RIKEN cDNA 4632415L05 gene	lincRNA gene	ENSMUSG00000048106
P14_CB	4632415L05Rik	current symbol	4632415L05Rik	0.404786	6.00098	2.03e-05	0.0019312	RIKEN cDNA 4632415L05 gene	lincRNA gene	ENSMUSG00000048106
P35_CB	4632415L05Rik	current symbol	4632415L05Rik	0.259139	5.63676	0.0136759	0.0412018	RIKEN cDNA 4632415L05 gene	lincRNA gene	ENSMUSG00000048106
P35_CB	4732471J01Rik	current symbol	4732471J01Rik	-0.89855	1.71679	0.0125094	0.0384174	RIKEN cDNA 4732471J01 gene	antisense lncRNA gene	ENSMUSG00000053714
P35_CB	4831440D22Rik	current symbol	4831440D22Rik	0.453846	3.89452	0.0124156	0.03819	RIKEN cDNA 4831440D22 gene	antisense lncRNA gene	ENSMUSG00000110138
P35_CB	4831440E17Rik	current symbol	4831440E17Rik	-1.11297	2.6636	4.7e-05	0.000346437	RIKEN cDNA 4831440E17 gene	lincRNA gene	ENSMUSG00000097236
P35_CB	4833420G17Rik	current symbol	4833420G17Rik	-0.33703	5.37218	0.00389047	0.0148126	RIKEN cDNA 4833420G17 gene	protein coding gene	ENSMUSG00000062822
P35_CB	4930404I05Rik	current symbol	4930404I05Rik	-1.83677	1.05769	0.000117152	0.000769336	RIKEN cDNA 4930404I05 gene	lncRNA gene	ENSMUSG00000087354
P35_CB	4930422G04Rik	old symbol	Zgrf1	-2.3058	2.8711	3.78e-17	2.29e-15	zinc finger, GRF-type containing 1	protein coding gene	ENSMUSG00000051278
P35_CB	4930430F08Rik	current symbol	4930430F08Rik	-0.461056	4.92788	0.000302971	0.00172131	RIKEN cDNA 4930430F08 gene	protein coding gene	ENSMUSG00000046567
P35_CB	4930432O21Rik	old symbol	Zfp943	-0.760621	4.60609	9.12e-08	1.37e-06	zinc finger prtoein 943	protein coding gene	ENSMUSG00000053347
P35_CB	4930503L19Rik	current symbol	4930503L19Rik	-1.39898	3.41025	1.06e-10	2.74e-09	RIKEN cDNA 4930503L19 gene	protein coding gene	ENSMUSG00000044906
P35_CB	4930506M07Rik	old symbol	Shtn1	-0.529742	4.58979	0.000202021	0.00121374	shootin 1	protein coding gene	ENSMUSG00000041362
P35_CB	4930518I15Rik	current symbol	4930518I15Rik	-1.63268	1.1246	0.000288693	0.00165132	RIKEN cDNA 4930518I15 gene	protein coding gene	ENSMUSG00000074629
P35_CB	4930523C07Rik	current symbol	4930523C07Rik	-0.975364	2.87549	0.000118385	0.000775331	RIKEN cDNA 4930523C07 gene	protein coding gene	ENSMUSG00000090394
P35_CB	4930528A17Rik	current symbol	4930528A17Rik	-1.48892	2.79022	2.22e-08	3.75e-07	RIKEN cDNA 4930528A17 gene	lncRNA gene
P35_CB	4930570G19Rik	current symbol	4930570G19Rik	-1.42795	3.81777	3.23e-14	1.42e-12	RIKEN cDNA 4930570G19 gene	lincRNA gene	ENSMUSG00000085084
P35_CB	4930581F22Rik	current symbol	4930581F22Rik	-0.64149	2.7035	0.015628	0.0460337	RIKEN cDNA 4930581F22 gene	lncRNA gene	ENSMUSG00000070315
P35_CB	4931406C07Rik	current symbol	4931406C07Rik	-0.500184	4.44169	0.000828184	0.00405431	RIKEN cDNA 4931406C07 gene	protein coding gene	ENSMUSG00000031938
P35_CB	4931406P16Rik	current symbol	4931406P16Rik	-0.246668	5.92784	0.0146552	0.0436451	RIKEN cDNA 4931406P16 gene	protein coding gene	ENSMUSG00000066571
P35_CB	4932415G12Rik	old symbol	Cep83os	-0.454262	4.75581	0.000906241	0.00437136	centrosomal protein 83, opposite strand	bidirectional promoter lncRNA gene	ENSMUSG00000097164
P35_CB	4932422M17Rik	current symbol	4932422M17Rik	-2.37889	3.8988	1.74e-33	2.7e-31	RIKEN cDNA 4932422M17 gene	lincRNA gene	ENSMUSG00000105881
P14_HC	4932425I24Rik	old symbol	Maats1	1.61082	1.15392	8.66e-06	0.000667398	MYCBP-associated, testis expressed 1	protein coding gene	ENSMUSG00000022805
P14_HC	4932438A13Rik	current symbol	4932438A13Rik	0.335328	6.93703	0.00139976	0.0357699	RIKEN cDNA 4932438A13 gene	protein coding gene	ENSMUSG00000037270
P35_CB	4932441K18Rik	old symbol	Txlng	-0.599242	4.42977	6.82e-05	0.000479007	taxilin gamma	protein coding gene	ENSMUSG00000038344
P35_CB	4933404O12Rik	current symbol	4933404O12Rik	0.772265	3.48215	0.000159535	0.000989355	RIKEN cDNA 4933404O12 gene	lincRNA gene	ENSMUSG00000097908
P35_CB	4933407C03Rik	old symbol	Cmip	0.573918	6.50511	3.69e-10	8.4e-09	c-Maf inducing protein	protein coding gene	ENSMUSG00000034390
P35_CB	4933407H18Rik	old symbol	Uvssa	-1.09973	4.05277	1.72e-10	4.22e-09	UV stimulated scaffold protein A	protein coding gene	ENSMUSG00000037355
P35_CB	4933407L21Rik	current symbol	4933407L21Rik	-1.01241	1.44184	0.0120763	0.0374283	RIKEN cDNA 4933407L21 gene	protein coding gene	ENSMUSG00000026224
P14_CB	4933409K07Rik	current symbol	4933409K07Rik	-0.46559	4.58192	0.000114043	0.00802953	RIKEN cDNA 4933409K07 gene	unclassified gene
P35_CB	4933409K07Rik	current symbol	4933409K07Rik	-0.888417	8.06118	3.14e-23	2.87e-21	RIKEN cDNA 4933409K07 gene	unclassified gene
P35_CB	4933421E11Rik	old symbol	Lrif1	-0.643087	4.28545	3.83e-05	0.000290824	ligand dependent nuclear receptor interacting factor 1	protein coding gene	ENSMUSG00000056260
P35_CB	4933424B01Rik	old symbol	Ints13	-0.526301	4.72719	0.00011772	0.000772312	integrator complex subunit 13	protein coding gene	ENSMUSG00000040250
P35_CB	4933429F08Rik	old symbol	Arhgef37	-0.461584	4.22032	0.00353335	0.013673	Rho guanine nucleotide exchange factor (GEF) 37	protein coding gene	ENSMUSG00000045094
P35_CB	4933432B09Rik	old symbol	Fam227a	-0.790899	2.53985	0.00445665	0.0165796	family with sequence similarity 227, member A	protein coding gene	ENSMUSG00000042564
P35_CB	4933434E20Rik	current symbol	4933434E20Rik	-0.28221	5.68679	0.00787002	0.0265325	RIKEN cDNA 4933434E20 gene	protein coding gene	ENSMUSG00000027942
P14_HC	4933439C10Rik	current symbol	4933439C10Rik	-1.00825	4.59482	9.21e-12	3.2e-09	RIKEN cDNA 4933439C10 gene	lncRNA gene	ENSMUSG00000072893
P35_CB	4933439C10Rik	current symbol	4933439C10Rik	-0.8648	3.78302	3.81e-06	3.83e-05	RIKEN cDNA 4933439C10 gene	lncRNA gene	ENSMUSG00000072893
P35_CB	5031439G07Rik	current symbol	5031439G07Rik	-0.319436	6.86005	0.000249637	0.00145634	RIKEN cDNA 5031439G07 gene	protein coding gene	ENSMUSG00000036046
P35_CB	5033414D02Rik	old symbol	Plgrkt	-0.545507	3.28452	0.0109365	0.0346118	plasminogen receptor, C-terminal lysine transmembrane protein	protein coding gene	ENSMUSG00000016495
P35_CB	5330426P16Rik	old symbol	Dubr	-1.99592	1.45321	1.55e-06	1.72e-05	Dppa2 upstream binding RNA	lincRNA gene	ENSMUSG00000022639
P35_CB	5430435G22Rik	old symbol	Rab7b	-0.896096	2.39581	0.00209111	0.00881838	RAB7B, member RAS oncogene family	protein coding gene	ENSMUSG00000052688
P35_CB	5430437P03Rik	old symbol	Babam1	0.381402	5.91665	0.000153078	0.000955021	BRISC and BRCA1 A complex member 1	protein coding gene	ENSMUSG00000031820
P35_CB	5530601H04Rik	current symbol	5530601H04Rik	-0.779714	3.06775	0.000931585	0.00447439	RIKEN cDNA 5530601H04 gene	lncRNA gene	ENSMUSG00000087174
P35_CB	5730403B10Rik	old symbol	Cdip1	0.3377	8.19498	0.000165606	0.0010209	cell death inducing Trp53 target 1	protein coding gene	ENSMUSG00000004071
P35_CB	5730409E04Rik	current symbol	5730409E04Rik	0.439898	6.50835	1.45e-06	1.62e-05	RIKEN cDNA 5730409E04Rik gene	protein coding gene	ENSMUSG00000073755
P35_CB	5730410E15Rik	old symbol	Sybu	0.328335	7.13128	0.000115355	0.000758644	syntabulin (syntaxin-interacting)	protein coding gene	ENSMUSG00000022340
P35_CB	5730419I09Rik	old symbol	C2cd5	-0.312629	5.89268	0.00197367	0.00838606	C2 calcium-dependent domain containing 5	protein coding gene	ENSMUSG00000030279
P35_CB	5730455P16Rik	current symbol	5730455P16Rik	-0.220241	6.81096	0.0121924	0.0377015	RIKEN cDNA 5730455P16 gene	protein coding gene	ENSMUSG00000057181
P14_CB	5730469M10Rik	old symbol	Prxl2a	-0.379055	6.58502	3.03e-05	0.00269863	peroxiredoxin like 2A	protein coding gene	ENSMUSG00000021792
P35_CB	5830416P10Rik	old symbol	Mirt1	-1.38626	3.16633	3.51e-09	6.89e-08	myocardial infarction associated transcript 1	lincRNA gene	ENSMUSG00000097636
P35_CB	5830418K08Rik	old symbol	Cep295	-0.5979	5.36237	2.56e-07	3.43e-06	centrosomal protein 295	protein coding gene	ENSMUSG00000046111
P35_CB	5930403L14Rik	current symbol	5930403L14Rik	-0.670361	2.65301	0.0117364	0.0365931	RIKEN cDNA 5930403L14 gene	lncRNA gene
P35_CB	5930434B04Rik	old symbol	Cacfd1	0.351186	4.5263	0.0163909	0.0479666	calcium channel flower domain containing 1	protein coding gene	ENSMUSG00000015488
P35_HC	6330403A02Rik	old symbol	Stum	-0.575091	8.74548	5.31e-05	0.00709831	mechanosensory transduction mediator	protein coding gene	ENSMUSG00000053963
P35_CB	6330403K07Rik	current symbol	6330403K07Rik	0.548027	4.91577	3.47e-05	0.000266423	RIKEN cDNA 6330403K07 gene	protein coding gene	ENSMUSG00000018451
P35_CB	6330403M23Rik	old symbol	Igip	-0.402516	7.51687	3.27e-06	3.35e-05	IgA inducing protein	protein coding gene	ENSMUSG00000110185
P35_CB	6330407J23Rik	old symbol	Soga3	0.326784	5.9851	0.00103688	0.00488957	SOGA family member 3	protein coding gene	ENSMUSG00000038916
P35_CB	6330416L07Rik	old symbol	Zfp944	-0.76916	4.18547	2.16e-06	2.32e-05	zinc finger protein 944	protein coding gene	ENSMUSG00000033972
P35_CB	6330439K17Rik	old symbol	Dzank1	0.363801	7.58131	2.54e-05	0.000201551	double zinc ribbon and ankyrin repeat domains 1	protein coding gene	ENSMUSG00000037259
P35_CB	6330503K22Rik	old symbol	Ccp110	-0.346916	6.52982	0.000126074	0.000816391	centriolar coiled coil protein 110	protein coding gene	ENSMUSG00000033904
P14_HC	6330527O06Rik	old symbol	Lamp5	-0.8314	5.2178	6.75e-11	2.05e-08	lysosomal-associated membrane protein family, member 5	protein coding gene	ENSMUSG00000027270
P35_CB	6430527G18Rik	old symbol	Irf2bpl	0.493559	7.10396	6.87e-09	1.28e-07	interferon regulatory factor 2 binding protein-like	protein coding gene	ENSMUSG00000034168
P35_CB	6430548M08Rik	current symbol	6430548M08Rik	0.589449	8.91003	4.81e-10	1.07e-08	RIKEN cDNA 6430548M08 gene	protein coding gene	ENSMUSG00000031824
P35_HC	6430704M03Rik	old symbol	Frrs1l	-0.658619	7.5021	3.97e-06	0.000817121	ferric-chelate reductase 1 like	protein coding gene	ENSMUSG00000045589
P14_CB	6530418L21Rik	old symbol	Inka2	0.381138	5.73974	9.84e-05	0.00703416	inka box actin regulator 2	protein coding gene	ENSMUSG00000048458
P35_CB	6530418L21Rik	old symbol	Inka2	0.640198	5.31912	4.99e-08	7.89e-07	inka box actin regulator 2	protein coding gene	ENSMUSG00000048458
P35_CB	6720401G13Rik	old symbol	Firre	-1.52849	6.62661	7.15e-63	4.38e-60	functional intergenic repeating RNA element	lncRNA gene	ENSMUSG00000085396
P14_CB	6720456H20Rik	old symbol	Tmem260	0.409404	4.99171	0.000208344	0.013455	transmembrane protein 260	protein coding gene	ENSMUSG00000036339
P35_CB	6720456H20Rik	old symbol	Tmem260	0.363225	4.7119	0.00849436	0.0281655	transmembrane protein 260	protein coding gene	ENSMUSG00000036339
P35_CB	6720463M24Rik	old symbol	Bora	-0.925934	2.42702	0.00130599	0.00591445	bora, aurora kinase A activator	protein coding gene	ENSMUSG00000022070
P14_HC	6820431F20Rik	current symbol	6820431F20Rik	0.553006	5.94117	9.07e-07	9.84e-05	RIKEN cDNA 6820431F20 gene	pseudogene	ENSMUSG00000071796
P35_CB	6820431F20Rik	current symbol	6820431F20Rik	-0.753134	6.13265	8.4e-15	3.91e-13	RIKEN cDNA 6820431F20 gene	pseudogene	ENSMUSG00000071796
P35_CB	8430419L09Rik	old symbol	Fam234b	0.620966	7.42165	4.05e-13	1.51e-11	family with sequence similarity 234, member B	protein coding gene	ENSMUSG00000030207
P35_CB	9030025P20Rik	current symbol	9030025P20Rik	-1.45107	2.43828	1.22e-06	1.39e-05	RIKEN cDNA 9030025P20 gene	protein coding gene	ENSMUSG00000116953
P35_CB	9030425E11Rik	old symbol	Clmp	-0.546704	5.31686	3.24e-06	3.32e-05	CXADR-like membrane protein	protein coding gene	ENSMUSG00000032024
P35_CB	9030607L17Rik	old symbol	Izumo4	-1.62504	4.06277	3.03e-20	2.32e-18	IZUMO family member 4	protein coding gene	ENSMUSG00000055862
P35_CB	9130401M01Rik	current symbol	9130401M01Rik	0.338652	5.15205	0.00499608	0.018249	RIKEN cDNA 9130401M01 gene	protein coding gene	ENSMUSG00000101892
P35_CB	9230105E10Rik	old symbol	Trim12c	-1.01054	2.08571	0.00235353	0.00970938	tripartite motif-containing 12C	protein coding gene	ENSMUSG00000057143
P35_CB	9330101J02Rik	old symbol	Cfap46	-1.20243	1.62412	0.00149951	0.00666547	cilia and flagella associated protein 46	protein coding gene	ENSMUSG00000049571
P35_CB	9330151L19Rik	current symbol	9330151L19Rik	-0.729974	4.72189	1.15e-07	1.68e-06	RIKEN cDNA 9330151L19 gene	bidirectional promoter lncRNA gene	ENSMUSG00000097061
P35_CB	9330188P03Rik	current symbol	9330188P03Rik	-0.938812	3.29641	1.7e-05	0.000143153	RIKEN cDNA 9330188P03 gene	lncRNA gene	ENSMUSG00000115149
P35_CB	9430008C03Rik	old symbol	Snhg17	-0.686543	3.04421	0.00392169	0.0149062	small nucleolar RNA host gene 17	lncRNA gene	ENSMUSG00000085385
P35_CB	9430015G10Rik	current symbol	9430015G10Rik	-0.50437	4.27131	0.00119431	0.00547863	RIKEN cDNA 9430015G10 gene	protein coding gene	ENSMUSG00000059939
P35_CB	9430020K01Rik	old symbol	Jcad	-0.53885	5.55908	7.05e-07	8.46e-06	junctional cadherin 5 associated	protein coding gene	ENSMUSG00000033960
P35_CB	9430023L20Rik	old symbol	Atg101	0.749035	4.2929	1.56e-06	1.74e-05	autophagy related 101	protein coding gene	ENSMUSG00000037204
P35_CB	9430025M13Rik	old symbol	Zfp939	-0.61881	3.34705	0.00396199	0.0150297	zinc finger protein 939	protein coding gene	ENSMUSG00000030424
P35_CB	9530082P21Rik	current symbol	9530082P21Rik	0.380655	6.59133	2.26e-05	0.000182084	RIKEN cDNA 9530082P21 gene	antisense lncRNA gene	ENSMUSG00000097006
P14_HC	9630013A20Rik	current symbol	9630013A20Rik	0.682025	4.64147	2.94e-06	0.000279054	RIKEN cDNA 9630013A20 gene	antisense lncRNA gene	ENSMUSG00000115529
P35_CB	9630033F20Rik	old symbol	Tigar	0.40094	4.70947	0.00383517	0.0146357	Trp53 induced glycolysis regulatory phosphatase	protein coding gene	ENSMUSG00000038028
P35_CB	9830001H06Rik	old symbol	Soga1	0.244606	9.15409	0.0109749	0.0347087	suppressor of glucose, autophagy associated 1	protein coding gene	ENSMUSG00000055485
P35_CB	9930013L23Rik	old symbol	Cemip	0.467004	5.98968	2.73e-06	2.87e-05	cell migration inducing protein, hyaluronan binding	protein coding gene	ENSMUSG00000052353
P35_CB	9930021J03Rik	current symbol	9930021J03Rik	-0.300891	6.26179	0.00142546	0.0063699	RIKEN cDNA 9930021J03 gene	protein coding gene	ENSMUSG00000046138
P35_CB	A030001D20Rik	current symbol	A030001D20Rik	-0.649638	2.74975	0.013681	0.0412081	RIKEN cDNA A030001D20 gene	antisense lncRNA gene	ENSMUSG00000110357
P35_CB	A130022J15Rik	old symbol	Eogt	-0.872856	3.76966	2.89e-06	3e-05	EGF domain-specific O-linked N-acetylglucosamine (GlcNAc) transferase	protein coding gene	ENSMUSG00000035245
P14_HC	A130040M12Rik	current symbol	A130040M12Rik	-0.479303	4.48989	0.00147094	0.0372026	RIKEN cDNA A130040M12 gene	unclassified non-coding RNA gene
P14_CB	A130040M12Rik	current symbol	A130040M12Rik	-0.731965	5.16013	7.2e-12	2.61e-09	RIKEN cDNA A130040M12 gene	unclassified non-coding RNA gene
P14_CB	A230006K03Rik	current symbol	A230006K03Rik	-1.37049	1.16605	3.42e-06	0.00042941	RIKEN cDNA A230006K03 gene	lincRNA gene	ENSMUSG00000068151
P35_CB	A230046K03Rik	old symbol	Washc4	-0.376499	6.66152	2.61e-05	0.000206919	WASH complex subunit 4	protein coding gene	ENSMUSG00000034560
P35_CB	A230050P20Rik	old symbol	Shfl	-0.561312	4.68599	5.64e-05	0.000405455	shiftless antiviral inhibitor of ribosomal frameshifting	protein coding gene	ENSMUSG00000038884
P35_CB	A230056P14Rik	current symbol	A230056P14Rik	-0.360661	4.42453	0.0151908	0.0449522	RIKEN cDNA A230056P14 gene	lncRNA gene	ENSMUSG00000087178
P35_CB	A230057D06Rik	current symbol	A230057D06Rik	-2.79689	4.17894	6.8e-51	2.29e-48	RIKEN cDNA A230057D06 gene	lincRNA gene	ENSMUSG00000109394
P35_CB	A330008L17Rik	current symbol	A330008L17Rik	-0.85559	1.97774	0.0110086	0.0347828	RIKEN cDNA A330008L17 gene	lincRNA gene	ENSMUSG00000052479
P35_CB	A330021E22Rik	old symbol	Cfap69	-0.987133	2.6233	0.000329391	0.00185035	cilia and flagella associated protein 69	protein coding gene	ENSMUSG00000040473
P35_CB	A330023F24Rik	current symbol	A330023F24Rik	-1.1761	1.3005	0.00405144	0.0153173	RIKEN cDNA A330023F24 gene	lncRNA gene	ENSMUSG00000096929
P35_CB	A330076H08Rik	current symbol	A330076H08Rik	-1.45767	3.2261	3.24e-10	7.47e-09	RIKEN cDNA A330076H08 gene	lncRNA gene	ENSMUSG00000109321
P14_HC	A430078G23Rik	old symbol	Arhgef18	-0.789903	2.79327	0.000728589	0.0219304	rho/rac guanine nucleotide exchange factor (GEF) 18	protein coding gene	ENSMUSG00000004568
P14_HC	A430078G23Rik	old symbol	Arhgef18	-0.789903	2.79327	0.000728589	0.0219304	rho/rac guanine nucleotide exchange factor (GEF) 18	protein coding gene	ENSMUSG00000074497
P35_CB	A430078G23Rik	old symbol	Arhgef18	-1.4631	2.58536	2.19e-07	2.98e-06	rho/rac guanine nucleotide exchange factor (GEF) 18	protein coding gene	ENSMUSG00000004568
P35_CB	A430078G23Rik	old symbol	Arhgef18	-1.4631	2.58536	2.19e-07	2.98e-06	rho/rac guanine nucleotide exchange factor (GEF) 18	protein coding gene	ENSMUSG00000074497
P35_CB	A430105I19Rik	old symbol	Ccdc9b	-0.590255	4.00088	0.000629408	0.00321793	coiled-coil domain containing 9B	protein coding gene	ENSMUSG00000045838
P35_CB	A430107O13Rik	old symbol	Cped1	-0.828461	2.18801	0.00879716	0.0289629	cadherin-like and PC-esterase domain containing 1	protein coding gene	ENSMUSG00000062980
P35_CB	A530054K11Rik	old symbol	Zfp729a	-1.22075	4.75572	1.83e-18	1.25e-16	zinc finger protein 729a	protein coding gene	ENSMUSG00000021510
P35_CB	A530058N18Rik	current symbol	A530058N18Rik	-1.97669	1.21788	9.32e-06	8.38e-05	RIKEN cDNA A530058N18 gene	lncRNA gene	ENSMUSG00000092201
P35_CB	A530058N18Rik	current symbol	A530058N18Rik	-1.97669	1.21788	9.32e-06	8.38e-05	RIKEN cDNA A530058N18 gene	lncRNA gene	ENSMUSG00000087694
P14_HC	A630007B06Rik	old symbol	Ccdc186	0.509942	4.3811	0.00104589	0.0286249	coiled-coil domain containing 186	protein coding gene	ENSMUSG00000035173
P35_CB	A630033E08Rik	old symbol	Zfp945	-1.13594	3.64149	1.18e-08	2.09e-07	zinc finger protein 945	protein coding gene	ENSMUSG00000059142
P14_HC	A630089N07Rik	current symbol	A630089N07Rik	1.17231	1.05283	0.00138063	0.0354115	RIKEN cDNA A630089N07 gene	lncRNA gene	ENSMUSG00000116673
P35_CB	A730011C13Rik	current symbol	A730011C13Rik	-0.544545	3.83678	0.00295046	0.0117339	RIKEN cDNA A730011C13 gene	antisense lncRNA gene	ENSMUSG00000084846
P35_CB	A730090H04Rik	old symbol	Dlx4os	0.932591	3.1877	3.59e-05	0.000274892	distal-less homeobox 4, opposite strand	antisense lncRNA gene	ENSMUSG00000086552
P14_CB	A830018L16Rik	current symbol	A830018L16Rik	0.412417	5.40124	5.44e-05	0.00446974	RIKEN cDNA A830018L16 gene	protein coding gene	ENSMUSG00000057715
P14_CB	A830039N20Rik	current symbol	A830039N20Rik	-0.443444	6.50468	1.12e-06	0.0001559	RIKEN cDNA A830039N20 gene	lincRNA gene
P35_CB	A830039N20Rik	current symbol	A830039N20Rik	-0.239848	6.41932	0.00989426	0.0320275	RIKEN cDNA A830039N20 gene	lincRNA gene
P35_CB	A830080D01Rik	old symbol	Bclaf3	-0.875545	3.38683	4.05e-05	0.000304864	Bclaf1 and Thrap3 family member 3	protein coding gene	ENSMUSG00000044150
P35_CB	A830093I24Rik	old symbol	Fam228b	-1.38484	1.78818	0.000194591	0.00117486	family with sequence similarity 228, member B	protein coding gene	ENSMUSG00000050545
P35_CB	A930012L18Rik	current symbol	A930012L18Rik	-1.18348	2.63448	1.9e-05	0.000156994	RIKEN cDNA A930012L18 gene	antisense lncRNA gene	ENSMUSG00000097610
P35_CB	A930013F10Rik	current symbol	A930013F10Rik	-1.38564	3.55452	1.26e-11	3.71e-10	RIKEN cDNA A930013F10 gene	lncRNA gene
P35_CB	A930015D03Rik	current symbol	A930015D03Rik	0.732985	2.36758	0.0139464	0.0418418	RIKEN cDNA A930015D03 gene	antisense lncRNA gene	ENSMUSG00000092368
P35_CB	Aamp	current symbol	Aamp	0.254704	7.04747	0.00294125	0.0117042	angio-associated migratory protein	protein coding gene	ENSMUSG00000006299
P35_CB	Aard	current symbol	Aard	-0.605721	2.88714	0.0156334	0.0460397	alanine and arginine rich domain containing protein	protein coding gene	ENSMUSG00000068522
P35_CB	Aars	current symbol	Aars	0.557494	7.87168	2.76e-10	6.48e-09	alanyl-tRNA synthetase	protein coding gene	ENSMUSG00000031960
P35_CB	Aars2	current symbol	Aars2	-0.474928	5.23913	8.04e-05	0.000552025	alanyl-tRNA synthetase 2, mitochondrial	protein coding gene	ENSMUSG00000023938
P35_CB	Abca3	current symbol	Abca3	0.262734	6.89804	0.00229016	0.00950028	ATP-binding cassette, sub-family A (ABC1), member 3	protein coding gene	ENSMUSG00000024130
P35_CB	Abca4	current symbol	Abca4	-0.849465	2.47337	0.00244405	0.0100124	ATP-binding cassette, sub-family A (ABC1), member 4	protein coding gene	ENSMUSG00000028125
P35_CB	Abca7	current symbol	Abca7	-0.649905	6.23799	8.04e-12	2.44e-10	ATP-binding cassette, sub-family A (ABC1), member 7	protein coding gene	ENSMUSG00000035722
P35_CB	Abca8b	current symbol	Abca8b	-0.512843	5.51082	3.89e-06	3.9e-05	ATP-binding cassette, sub-family A (ABC1), member 8b	protein coding gene	ENSMUSG00000020620
P35_CB	Abca9	current symbol	Abca9	-0.605462	2.99225	0.0114113	0.0358044	ATP-binding cassette, sub-family A (ABC1), member 9	protein coding gene	ENSMUSG00000041797
P35_CB	Abcb1a	current symbol	Abcb1a	-0.926866	4.69437	2.4e-11	6.83e-10	ATP-binding cassette, sub-family B (MDR/TAP), member 1A	protein coding gene	ENSMUSG00000040584
P35_CB	Abcc10	current symbol	Abcc10	-0.898005	3.9343	3.46e-07	4.46e-06	ATP-binding cassette, sub-family C (CFTR/MRP), member 10	protein coding gene	ENSMUSG00000032842
P35_CB	Abcc12	current symbol	Abcc12	-0.795144	2.90395	0.0014661	0.00653205	ATP-binding cassette, sub-family C (CFTR/MRP), member 12	protein coding gene	ENSMUSG00000036872
P35_CB	Abcc5	current symbol	Abcc5	-0.659394	6.74355	8.67e-14	3.5e-12	ATP-binding cassette, sub-family C (CFTR/MRP), member 5	protein coding gene	ENSMUSG00000022822
P35_CB	Abcc6	current symbol	Abcc6	-3.96484	0.773651	9.19e-10	1.97e-08	ATP-binding cassette, sub-family C (CFTR/MRP), member 6	protein coding gene	ENSMUSG00000030834
P14_HC	Abcc8	current symbol	Abcc8	-0.676403	5.22866	9.81e-08	1.46e-05	ATP-binding cassette, sub-family C (CFTR/MRP), member 8	protein coding gene	ENSMUSG00000040136
P35_CB	Abcc8	current symbol	Abcc8	-0.447757	5.91355	8.57e-06	7.8e-05	ATP-binding cassette, sub-family C (CFTR/MRP), member 8	protein coding gene	ENSMUSG00000040136
P35_CB	Abcc9	current symbol	Abcc9	-0.694388	2.84838	0.00640421	0.0223911	ATP-binding cassette, sub-family C (CFTR/MRP), member 9	protein coding gene	ENSMUSG00000030249
P35_CB	Abcd4	current symbol	Abcd4	-0.77208	4.11352	3.96e-06	3.96e-05	ATP-binding cassette, sub-family D (ALD), member 4	protein coding gene	ENSMUSG00000021240
P35_CB	Abce1	current symbol	Abce1	-0.243878	6.66419	0.00644882	0.0224891	ATP-binding cassette, sub-family E (OABP), member 1	protein coding gene	ENSMUSG00000058355
P35_CB	Abcf1	current symbol	Abcf1	0.452015	6.66924	4.43e-07	5.62e-06	ATP-binding cassette, sub-family F (GCN20), member 1	protein coding gene	ENSMUSG00000038762
P35_CB	Abcf2	current symbol	Abcf2	0.460466	6.72845	2.16e-07	2.94e-06	ATP-binding cassette, sub-family F (GCN20), member 2	protein coding gene	ENSMUSG00000028953
P35_CB	Abcg1	current symbol	Abcg1	0.297293	6.81464	0.000724155	0.00362535	ATP binding cassette subfamily G member 1	protein coding gene	ENSMUSG00000024030
P35_CB	Abcg2	current symbol	Abcg2	-1.12779	3.66844	9.34e-09	1.7e-07	ATP binding cassette subfamily G member 2 (Junior blood group)	protein coding gene	ENSMUSG00000029802
P14_CB	Abhd1	current symbol	Abhd1	0.866981	3.16347	9.64e-07	0.000138645	abhydrolase domain containing 1	protein coding gene	ENSMUSG00000006638
P35_CB	Abhd1	current symbol	Abhd1	0.999787	4.24358	3.63e-10	8.29e-09	abhydrolase domain containing 1	protein coding gene	ENSMUSG00000006638
P35_CB	Abhd13	current symbol	Abhd13	-0.383742	6.03732	0.000102486	0.000685716	abhydrolase domain containing 13	protein coding gene	ENSMUSG00000040396
P35_CB	Abhd14b	current symbol	Abhd14b	-1.49862	4.51174	4.63e-23	4.13e-21	abhydrolase domain containing 14b	protein coding gene	ENSMUSG00000042073
P35_CB	Abhd3	current symbol	Abhd3	-0.247692	6.48924	0.00673003	0.0232951	abhydrolase domain containing 3	protein coding gene	ENSMUSG00000002475
P35_CB	Abhd4	current symbol	Abhd4	0.243431	6.42488	0.00958605	0.0311495	abhydrolase domain containing 4	protein coding gene	ENSMUSG00000040997
P35_CB	Abi3	current symbol	Abi3	0.27051	5.48471	0.0156742	0.0461397	ABI gene family, member 3	protein coding gene	ENSMUSG00000018381
P14_HC	Ablim3	current symbol	Ablim3	-0.552832	6.04634	6.36e-07	7.24e-05	actin binding LIM protein family, member 3	protein coding gene	ENSMUSG00000032735
P35_CB	Acaca	current symbol	Acaca	0.232973	6.59482	0.0100231	0.0323357	acetyl-Coenzyme A carboxylase alpha	protein coding gene	ENSMUSG00000020532
P35_CB	Acadsb	current symbol	Acadsb	-0.241899	5.93218	0.0166058	0.0484903	acyl-Coenzyme A dehydrogenase, short/branched chain	protein coding gene	ENSMUSG00000030861
P35_CB	Acap2	current symbol	Acap2	-0.461799	6.63864	2.48e-07	3.34e-06	ArfGAP with coiled-coil, ankyrin repeat and PH domains 2	protein coding gene	ENSMUSG00000049076
P35_CB	Acbd5	current symbol	Acbd5	-0.394352	6.64028	1.09e-05	9.63e-05	acyl-Coenzyme A binding domain containing 5	protein coding gene	ENSMUSG00000026781
P35_CB	Accn1	old symbol	Asic2	-0.277847	5.8543	0.00746865	0.0253889	acid-sensing (proton-gated) ion channel 2	protein coding gene	ENSMUSG00000020704
P14_HC	Accn4	old symbol	Asic4	-0.965434	4.82067	4.5e-12	1.6e-09	acid-sensing (proton-gated) ion channel family member 4	protein coding gene	ENSMUSG00000033007
P35_CB	Accs	current symbol	Accs	-1.11164	1.61898	0.00424118	0.0159186	1-aminocyclopropane-1-carboxylate synthase (non-functional)	protein coding gene	ENSMUSG00000040272
P35_CB	Ace	current symbol	Ace	-0.509774	4.50904	0.000408697	0.00223464	angiotensin I converting enzyme (peptidyl-dipeptidase A) 1	protein coding gene	ENSMUSG00000020681
P35_HC	Ace	current symbol	Ace	1.51974	3.94213	1.99e-08	7.03e-06	angiotensin I converting enzyme (peptidyl-dipeptidase A) 1	protein coding gene	ENSMUSG00000020681
P14_HC	Acer2	current symbol	Acer2	-0.986325	2.01926	0.000558543	0.0180241	alkaline ceramidase 2	protein coding gene	ENSMUSG00000038007
P14_CB	Acer2	current symbol	Acer2	-0.952266	1.92254	0.000140063	0.00961628	alkaline ceramidase 2	protein coding gene	ENSMUSG00000038007
P35_CB	Acly	current symbol	Acly	0.307248	7.63474	0.00039592	0.00217249	ATP citrate lyase	protein coding gene	ENSMUSG00000020917
P35_CB	Aco1	current symbol	Aco1	0.35974	5.62333	0.000851002	0.00414794	aconitase 1	protein coding gene	ENSMUSG00000028405
P35_CB	Aco2	current symbol	Aco2	0.280655	9.24864	0.00385451	0.0146923	aconitase 2, mitochondrial	protein coding gene	ENSMUSG00000022477
P14_HC	Acot11	current symbol	Acot11	-0.462594	5.66924	8.09e-05	0.00398697	acyl-CoA thioesterase 11	protein coding gene	ENSMUSG00000034853
P35_CB	Acot11	current symbol	Acot11	0.339563	6.31973	0.000401329	0.00219948	acyl-CoA thioesterase 11	protein coding gene	ENSMUSG00000034853
P35_CB	Acot7	current symbol	Acot7	0.52619	7.85415	2.33e-09	4.7e-08	acyl-CoA thioesterase 7	protein coding gene	ENSMUSG00000028937
P35_CB	Acp1	current symbol	Acp1	-0.403334	5.67025	0.000162255	0.00100345	acid phosphatase 1, soluble	protein coding gene	ENSMUSG00000044573
P35_CB	Acp2	current symbol	Acp2	-0.236209	6.39268	0.0104821	0.033504	acid phosphatase 2, lysosomal	protein coding gene	ENSMUSG00000002103
P35_CB	Acp6	current symbol	Acp6	-0.657291	3.36974	0.00211174	0.00889317	acid phosphatase 6, lysophosphatidic	protein coding gene	ENSMUSG00000028093
P14_HC	Acsbg1	current symbol	Acsbg1	-0.35717	7.41904	0.000774568	0.0227228	acyl-CoA synthetase bubblegum family member 1	protein coding gene	ENSMUSG00000032281
P35_CB	Acsl6	current symbol	Acsl6	-0.212401	7.62534	0.0140062	0.0419813	acyl-CoA synthetase long-chain family member 6	protein coding gene	ENSMUSG00000020333
P35_CB	Acta2	current symbol	Acta2	-1.61966	1.81251	9.18e-06	8.28e-05	actin, alpha 2, smooth muscle, aorta	protein coding gene	ENSMUSG00000035783
P35_CB	Actb	current symbol	Actb	0.400163	9.12753	3.19e-05	0.00024717	actin, beta	protein coding gene	ENSMUSG00000029580
P35_CB	Actg1	current symbol	Actg1	0.424223	7.6722	1.04e-06	1.21e-05	actin, gamma, cytoplasmic 1	protein coding gene	ENSMUSG00000062825
P14_HC	Actl6b	current symbol	Actl6b	-0.408227	6.52407	0.000133763	0.00598741	actin-like 6B	protein coding gene	ENSMUSG00000029712
P35_CB	Actr10	current symbol	Actr10	0.263396	7.2943	0.00204163	0.00864488	ARP10 actin-related protein 10	protein coding gene	ENSMUSG00000021076
P35_CB	Actr1a	current symbol	Actr1a	0.291733	7.55797	0.000750108	0.00373585	ARP1 actin-related protein 1A, centractin alpha	protein coding gene	ENSMUSG00000025228
P35_CB	Actr1b	current symbol	Actr1b	0.233855	7.75138	0.00712671	0.024436	ARP1 actin-related protein 1B, centractin beta	protein coding gene	ENSMUSG00000037351
P35_CB	Actr8	current symbol	Actr8	0.32224	5.5858	0.00308002	0.0121524	ARP8 actin-related protein 8	protein coding gene	ENSMUSG00000015971
P35_CB	Acvr2a	current symbol	Acvr2a	-0.866038	5.40396	5.76e-14	2.38e-12	activin receptor IIA	protein coding gene	ENSMUSG00000052155
P35_CB	Acvrl1	current symbol	Acvrl1	-0.866162	3.04909	0.000244826	0.0014351	activin A receptor, type II-like 1	protein coding gene	ENSMUSG00000000530
P35_CB	Adam10	current symbol	Adam10	-0.217717	6.97094	0.0115962	0.0362949	a disintegrin and metallopeptidase domain 10	protein coding gene	ENSMUSG00000054693
P35_CB	Adam11	current symbol	Adam11	-0.686527	8.29652	3.81e-14	1.65e-12	a disintegrin and metallopeptidase domain 11	protein coding gene	ENSMUSG00000020926
P35_CB	Adam17	current symbol	Adam17	-0.393729	4.97595	0.00186408	0.00800621	a disintegrin and metallopeptidase domain 17	protein coding gene	ENSMUSG00000052593
P35_CB	Adam1a	current symbol	Adam1a	-1.14402	3.41272	6.74e-08	1.04e-06	a disintegrin and metallopeptidase domain 1a	protein coding gene	ENSMUSG00000072647
P35_CB	Adam22	current symbol	Adam22	-0.299912	8.28084	0.000911687	0.00439605	a disintegrin and metallopeptidase domain 22	protein coding gene	ENSMUSG00000040537
P14_HC	Adam8	current symbol	Adam8	-0.956972	1.8073	0.00147191	0.0372026	a disintegrin and metallopeptidase domain 8	protein coding gene	ENSMUSG00000025473
P35_CB	Adamts10	current symbol	Adamts10	-1.31806	7.14699	1.81e-52	6.76e-50	a disintegrin-like and metallopeptidase (reprolysin type) with thrombospondin type 1 motif, 10	protein coding gene	ENSMUSG00000024299
P14_HC	Adamts15	current symbol	Adamts15	-0.833964	3.11757	0.000116438	0.00538566	a disintegrin-like and metallopeptidase (reprolysin type) with thrombospondin type 1 motif, 15	protein coding gene	ENSMUSG00000033453
P14_CB	Adamts16	current symbol	Adamts16	-0.49842	3.56228	0.00101924	0.0480052	a disintegrin-like and metallopeptidase (reprolysin type) with thrombospondin type 1 motif, 16	protein coding gene	ENSMUSG00000049538
P35_CB	Adamts16	current symbol	Adamts16	-1.83138	3.46936	1.01e-16	5.94e-15	a disintegrin-like and metallopeptidase (reprolysin type) with thrombospondin type 1 motif, 16	protein coding gene	ENSMUSG00000049538
P35_CB	Adamts18	current symbol	Adamts18	-0.454121	5.10897	0.000236049	0.00138909	a disintegrin-like and metallopeptidase (reprolysin type) with thrombospondin type 1 motif, 18	protein coding gene	ENSMUSG00000053399
P35_CB	Adamts2	current symbol	Adamts2	-0.522864	4.00108	0.00250797	0.0102276	a disintegrin-like and metallopeptidase (reprolysin type) with thrombospondin type 1 motif, 2	protein coding gene	ENSMUSG00000036545
P35_CB	Adamts20	current symbol	Adamts20	-0.960613	2.94647	9.04e-05	0.000612199	a disintegrin-like and metallopeptidase (reprolysin type) with thrombospondin type 1 motif, 20	protein coding gene	ENSMUSG00000022449
P35_CB	Adamts6	current symbol	Adamts6	-1.02798	1.88804	0.00281319	0.0112745	a disintegrin-like and metallopeptidase (reprolysin type) with thrombospondin type 1 motif, 6	protein coding gene	ENSMUSG00000046169
P35_CB	Adamts8	current symbol	Adamts8	-0.926517	1.77406	0.0122325	0.0377906	a disintegrin-like and metallopeptidase (reprolysin type) with thrombospondin type 1 motif, 8	protein coding gene	ENSMUSG00000031994
P35_CB	Adap1	current symbol	Adap1	0.216771	7.21713	0.0108707	0.0345007	ArfGAP with dual PH domains 1	protein coding gene	ENSMUSG00000056413
P35_CB	Adap2	current symbol	Adap2	-1.25441	1.2578	0.00435158	0.016256	ArfGAP with dual PH domains 2	protein coding gene	ENSMUSG00000020709
P35_CB	Adar	current symbol	Adar	0.40848	7.4284	2.18e-06	2.34e-05	adenosine deaminase, RNA-specific	protein coding gene	ENSMUSG00000027951
P35_CB	Adck5	current symbol	Adck5	-0.53952	3.80481	0.00347808	0.0134823	aarF domain containing kinase 5	protein coding gene	ENSMUSG00000022550
P35_HC	Adcy1	current symbol	Adcy1	-0.577708	10.2987	5.85e-05	0.00768678	adenylate cyclase 1	protein coding gene	ENSMUSG00000020431
P35_CB	Adcy6	current symbol	Adcy6	-0.506138	5.42666	8.59e-06	7.81e-05	adenylate cyclase 6	protein coding gene	ENSMUSG00000022994
P35_CB	Add1	current symbol	Add1	0.452827	8.39001	6.57e-07	7.98e-06	adducin 1 (alpha)	protein coding gene	ENSMUSG00000029106
P35_CB	Add2	current symbol	Add2	0.408852	5.99914	4.09e-05	0.000306898	adducin 2 (beta)	protein coding gene	ENSMUSG00000030000
P35_HC	Add2	current symbol	Add2	-0.497484	7.24999	0.000503695	0.0413839	adducin 2 (beta)	protein coding gene	ENSMUSG00000030000
P35_CB	Adora1	current symbol	Adora1	0.247151	8.32997	0.00637264	0.02231	adenosine A1 receptor	protein coding gene	ENSMUSG00000042429
P14_HC	Adora2a	current symbol	Adora2a	-1.63087	3.46511	1.43e-15	1.04e-12	adenosine A2a receptor	protein coding gene	ENSMUSG00000020178
P35_CB	Adprh	current symbol	Adprh	0.287435	6.32801	0.00195351	0.00832142	ADP-ribosylarginine hydrolase	protein coding gene	ENSMUSG00000002844
P35_CB	Adrb1	current symbol	Adrb1	-0.917658	2.11637	0.00410908	0.0155221	adrenergic receptor, beta 1	protein coding gene	ENSMUSG00000035283
P35_CB	Adrbk1	old symbol	Grk2	0.287115	8.39498	0.00157519	0.00692424	G protein-coupled receptor kinase 2	protein coding gene	ENSMUSG00000024858
P35_CB	Adrbk2	old symbol	Grk3	-0.581553	7.02216	1.47e-11	4.31e-10	G protein-coupled receptor kinase 3	protein coding gene	ENSMUSG00000042249
P35_CB	AF357359	current symbol	AF357359	-1.27768	2.87404	7.49e-07	8.92e-06	snoRNA AF357359	snoRNA gene
P35_CB	Afap1l1	current symbol	Afap1l1	-0.558306	4.60226	8.04e-05	0.000552174	actin filament associated protein 1-like 1	protein coding gene	ENSMUSG00000033032
P35_CB	Afap1l2	current symbol	Afap1l2	0.296315	6.92685	0.00061306	0.00314388	actin filament associated protein 1-like 2	protein coding gene	ENSMUSG00000025083
P35_CB	Aff1	current symbol	Aff1	0.346299	5.82708	0.000734538	0.00367051	AF4/FMR2 family, member 1	protein coding gene	ENSMUSG00000029313
P35_CB	Aff4	current symbol	Aff4	0.232998	8.39121	0.0105483	0.0336915	AF4/FMR2 family, member 4	protein coding gene	ENSMUSG00000049470
P35_CB	Aga	current symbol	Aga	-0.658001	2.84133	0.00939487	0.0306094	aspartylglucosaminidase	protein coding gene	ENSMUSG00000031521
P35_CB	Agap1	current symbol	Agap1	0.357506	7.64254	4.03e-05	0.000303585	ArfGAP with GTPase domain, ankyrin repeat and PH domain 1	protein coding gene	ENSMUSG00000055013
P35_CB	Agbl3	current symbol	Agbl3	-1.13024	2.94391	5.82e-06	5.55e-05	ATP/GTP binding protein-like 3	protein coding gene	ENSMUSG00000038836
P35_CB	Agk	current symbol	Agk	0.34081	5.18751	0.00512777	0.018589	acylglycerol kinase	protein coding gene	ENSMUSG00000029916
P35_CB	Agpat1	current symbol	Agpat1	0.271893	6.37957	0.00368047	0.0141416	1-acylglycerol-3-phosphate O-acyltransferase 1 (lysophosphatidic acid acyltransferase, alpha)	protein coding gene	ENSMUSG00000034254
P35_CB	Agpat5	current symbol	Agpat5	-0.224308	6.382	0.0153118	0.0452308	1-acylglycerol-3-phosphate O-acyltransferase 5 (lysophosphatidic acid acyltransferase, epsilon)	protein coding gene	ENSMUSG00000031467
P35_CB	Agpat6	old symbol	Gpat4	0.299842	6.83403	0.000635391	0.00324477	glycerol-3-phosphate acyltransferase 4	protein coding gene	ENSMUSG00000031545
P35_CB	Agrn	current symbol	Agrn	-1.17996	6.2471	4.66e-34	7.56e-32	agrin	protein coding gene	ENSMUSG00000041936
P14_HC	Agt	current symbol	Agt	-0.67698	5.23123	1.05e-07	1.53e-05	angiotensinogen (serpin peptidase inhibitor, clade A, member 8)	protein coding gene	ENSMUSG00000031980
P14_CB	Agt	current symbol	Agt	-0.362027	6.24326	8.44e-05	0.0062281	angiotensinogen (serpin peptidase inhibitor, clade A, member 8)	protein coding gene	ENSMUSG00000031980
P35_CB	Agt	current symbol	Agt	0.255825	6.22307	0.0080117	0.0269361	angiotensinogen (serpin peptidase inhibitor, clade A, member 8)	protein coding gene	ENSMUSG00000031980
P14_HC	Agxt2l1	old symbol	Etnppl	-2.45792	0.804974	2.88e-09	6.44e-07	ethanolamine phosphate phospholyase	protein coding gene	ENSMUSG00000019232
P14_CB	Agxt2l1	old symbol	Etnppl	-2.26292	2.16292	1.98e-19	1.05e-16	ethanolamine phosphate phospholyase	protein coding gene	ENSMUSG00000019232
P35_CB	Agxt2l1	old symbol	Etnppl	-1.17595	4.67314	3.42e-17	2.1e-15	ethanolamine phosphate phospholyase	protein coding gene	ENSMUSG00000019232
P35_HC	Agxt2l1	old symbol	Etnppl	-2.72573	2.5676	1.97e-09	8.77e-07	ethanolamine phosphate phospholyase	protein coding gene	ENSMUSG00000019232
P35_CB	Ahcy	current symbol	Ahcy	0.31481	5.40534	0.00581588	0.0206559	S-adenosylhomocysteine hydrolase	protein coding gene	ENSMUSG00000027597
P35_CB	Ahdc1	current symbol	Ahdc1	0.473708	6.41015	2.97e-07	3.91e-06	AT hook, DNA binding motif, containing 1	protein coding gene	ENSMUSG00000037692
P35_CB	Ahnak	current symbol	Ahnak	-0.930235	4.9647	4.67e-13	1.73e-11	AHNAK nucleoprotein (desmoyokin)	protein coding gene	ENSMUSG00000069833
P35_CB	Ahsa1	current symbol	Ahsa1	0.488518	6.90062	1.81e-08	3.11e-07	AHA1, activator of heat shock protein ATPase 1	protein coding gene	ENSMUSG00000021037
P35_CB	Ahsa2	current symbol	Ahsa2	-0.24802	5.86531	0.0144389	0.0431056	AHA1, activator of heat shock protein ATPase 2	protein coding gene	ENSMUSG00000020288
P35_CB	AI118078	old symbol	Tmem266	0.232568	6.24582	0.0131919	0.0400208	transmembrane protein 266	protein coding gene	ENSMUSG00000032313
P35_CB	AI314976	old symbol	Oard1	-0.474469	3.8755	0.00991621	0.03206	O-acyl-ADP-ribose deacylase 1	protein coding gene	ENSMUSG00000040771
P35_CB	AI414108	old symbol	Igsf9b	-0.324577	6.56645	0.000363865	0.00201546	immunoglobulin superfamily, member 9B	protein coding gene	ENSMUSG00000034275
P35_CB	AI428936	old symbol	Syne4	-0.963652	3.30773	1.11e-05	9.75e-05	spectrin repeat containing, nuclear envelope family member 4	protein coding gene	ENSMUSG00000019737
P14_CB	AI429214	current symbol	AI429214	-0.919204	1.77344	0.000371924	0.0215654	expressed sequence AI429214	protein coding gene	ENSMUSG00000074384
P35_CB	AI450353	current symbol	AI450353	-1.40605	1.79496	0.000105559	0.000703233	expressed sequence AI450353	lncRNA gene
P35_CB	AI452195	old symbol	Pde4d	0.537013	4.61764	0.00012809	0.00082746	phosphodiesterase 4D, cAMP specific	protein coding gene	ENSMUSG00000021699
P35_CB	AI464131	old symbol	Myorg	0.478777	5.55463	1.51e-05	0.00012879	myogenesis regulating glycosidase (putative)	protein coding gene	ENSMUSG00000046312
P35_CB	AI504432	current symbol	AI504432	-1.0418	4.16495	2.76e-10	6.48e-09	expressed sequence AI504432	lincRNA gene	ENSMUSG00000056145
P14_HC	AI593442	current symbol	AI593442	-0.437168	7.06008	3.07e-05	0.0018708	expressed sequence AI593442	protein coding gene	ENSMUSG00000078307
P35_CB	AI836003	old symbol	Ccdc184	0.638626	3.6275	0.00123247	0.00563071	coiled-coil domain containing 184	protein coding gene	ENSMUSG00000029875
P35_CB	AI837181	current symbol	AI837181	0.389038	5.92768	0.000111543	0.000738256	expressed sequence AI837181	protein coding gene	ENSMUSG00000047423
P35_CB	AI848100	old symbol	Suco	-0.491998	5.68363	4.03e-06	4.02e-05	SUN domain containing ossification factor	protein coding gene	ENSMUSG00000040297
P14_CB	AI854517	old symbol	Mir9-3hg	-0.412796	4.62437	0.000545676	0.0298822	Mir9-3 host gene	lincRNA gene	ENSMUSG00000097023
P35_CB	AI854517	old symbol	Mir9-3hg	-0.987432	4.95778	3.74e-14	1.62e-12	Mir9-3 host gene	lincRNA gene	ENSMUSG00000097023
P35_CB	AI987944	current symbol	AI987944	-0.592483	3.05571	0.0124289	0.0382136	expressed sequence AI987944	protein coding gene	ENSMUSG00000056383
P14_HC	Aifm3	current symbol	Aifm3	-0.408582	5.21182	0.00133803	0.0345425	apoptosis-inducing factor, mitochondrion-associated 3	protein coding gene	ENSMUSG00000022763
P35_CB	Aifm3	current symbol	Aifm3	-1.01941	7.39875	3.91e-32	5.73e-30	apoptosis-inducing factor, mitochondrion-associated 3	protein coding gene	ENSMUSG00000022763
P35_CB	Aip	current symbol	Aip	0.495239	6.20449	2.26e-07	3.07e-06	aryl-hydrocarbon receptor-interacting protein	protein coding gene	ENSMUSG00000024847
P35_CB	Airn	current symbol	Airn	-0.596851	3.21191	0.00708325	0.0242931	antisense Igf2r RNA	antisense lncRNA gene	ENSMUSG00000078247
P35_CB	Ak1	current symbol	Ak1	0.32923	6.81357	0.000174487	0.00106977	adenylate kinase 1	protein coding gene	ENSMUSG00000026817
P35_CB	Ak2	current symbol	Ak2	-0.3645	4.50116	0.0126789	0.0388316	adenylate kinase 2	protein coding gene	ENSMUSG00000028792
P14_HC	Ak3l1	old symbol	Ak4	0.393816	6.29984	0.000275401	0.0106447	adenylate kinase 4	protein coding gene	ENSMUSG00000028527
P14_CB	Ak3l1	old symbol	Ak4	0.524405	6.50309	8.23e-09	1.72e-06	adenylate kinase 4	protein coding gene	ENSMUSG00000028527
P35_CB	Ak3l1	old symbol	Ak4	0.450526	7.43374	1.45e-07	2.07e-06	adenylate kinase 4	protein coding gene	ENSMUSG00000028527
P14_HC	Ak7	current symbol	Ak7	1.67924	2.15698	4.7e-09	1e-06	adenylate kinase 7	protein coding gene	ENSMUSG00000041323
P35_CB	Akap1	current symbol	Akap1	0.336461	5.88781	0.000643416	0.00327751	A kinase (PRKA) anchor protein 1	protein coding gene	ENSMUSG00000018428
P35_CB	Akap12	current symbol	Akap12	0.378978	6.41379	4.06e-05	0.000305301	A kinase (PRKA) anchor protein (gravin) 12	protein coding gene	ENSMUSG00000038587
P35_CB	Akap2	current symbol	Akap2	0.233269	6.46235	0.011147	0.0351623	A kinase (PRKA) anchor protein 2	protein coding gene	ENSMUSG00000038729
P35_CB	Akap6	current symbol	Akap6	0.228451	7.21685	0.0075467	0.0256026	A kinase (PRKA) anchor protein 6	protein coding gene	ENSMUSG00000061603
P35_CB	Akap7	current symbol	Akap7	-0.620486	6.46268	2.23e-11	6.42e-10	A kinase (PRKA) anchor protein 7	protein coding gene	ENSMUSG00000039166
P35_CB	Akap8	current symbol	Akap8	-0.810701	6.73573	5.89e-20	4.46e-18	A kinase (PRKA) anchor protein 8	protein coding gene	ENSMUSG00000024045
P14_HC	Akap8l	current symbol	Akap8l	-0.413639	6.28217	0.00013237	0.00594423	A kinase (PRKA) anchor protein 8-like	protein coding gene	ENSMUSG00000002625
P35_CB	Akap8l	current symbol	Akap8l	-1.18289	5.8601	1.15e-29	1.54e-27	A kinase (PRKA) anchor protein 8-like	protein coding gene	ENSMUSG00000002625
P35_CB	Akr7a5	current symbol	Akr7a5	0.523219	4.78679	0.000114111	0.000752293	aldo-keto reductase family 7, member A5 (aflatoxin aldehyde reductase)	protein coding gene	ENSMUSG00000028743
P35_CB	Akt1s1	current symbol	Akt1s1	0.308887	5.2229	0.00885642	0.0290941	AKT1 substrate 1 (proline-rich)	protein coding gene	ENSMUSG00000011096
P35_CB	Akt2	current symbol	Akt2	0.242533	7.09169	0.00456268	0.0169088	thymoma viral proto-oncogene 2	protein coding gene	ENSMUSG00000004056
P35_CB	Alad	current symbol	Alad	0.810472	5.66841	1.31e-14	5.96e-13	aminolevulinate, delta-, dehydratase	protein coding gene	ENSMUSG00000028393
P35_CB	Alas1	current symbol	Alas1	0.333081	5.62657	0.00181563	0.00782056	aminolevulinic acid synthase 1	protein coding gene	ENSMUSG00000032786
P14_CB	Alas2	current symbol	Alas2	-0.80507	3.60051	1.1e-07	1.84e-05	aminolevulinic acid synthase 2, erythroid	protein coding gene	ENSMUSG00000025270
P35_CB	Alas2	current symbol	Alas2	0.561725	3.7622	0.00296209	0.0117663	aminolevulinic acid synthase 2, erythroid	protein coding gene	ENSMUSG00000025270
P35_CB	Aldh18a1	current symbol	Aldh18a1	0.454104	4.83525	0.000696954	0.00350609	aldehyde dehydrogenase 18 family, member A1	protein coding gene	ENSMUSG00000025007
P35_CB	Aldh1l1	current symbol	Aldh1l1	0.603175	6.28499	1.73e-10	4.24e-09	aldehyde dehydrogenase 1 family, member L1	protein coding gene	ENSMUSG00000030088
P35_CB	Aldh1l2	current symbol	Aldh1l2	-0.610518	4.30957	6.3e-05	0.000447781	aldehyde dehydrogenase 1 family, member L2	protein coding gene	ENSMUSG00000020256
P35_CB	Aldh4a1	current symbol	Aldh4a1	-0.351651	4.93633	0.00509029	0.0184979	aldehyde dehydrogenase 4 family, member A1	protein coding gene	ENSMUSG00000028737
P35_CB	Aldoa	current symbol	Aldoa	0.639758	10.0883	1.28e-10	3.25e-09	aldolase A, fructose-bisphosphate	protein coding gene	ENSMUSG00000030695
P35_CB	Aldoa	current symbol	Aldoa	0.639758	10.0883	1.28e-10	3.25e-09	aldolase A, fructose-bisphosphate	protein coding gene	ENSMUSG00000114515
P14_HC	Aldoc	current symbol	Aldoc	-0.397623	9.49887	0.000890412	0.0252666	aldolase C, fructose-bisphosphate	protein coding gene	ENSMUSG00000017390
P35_CB	Aldoc	current symbol	Aldoc	0.309106	10.8109	0.0017524	0.00759429	aldolase C, fructose-bisphosphate	protein coding gene	ENSMUSG00000017390
P35_CB	Alg6	current symbol	Alg6	-0.581011	4.00433	0.000792758	0.00391357	asparagine-linked glycosylation 6 (alpha-1,3,-glucosyltransferase)	protein coding gene	ENSMUSG00000073792
P35_CB	Alkbh5	current symbol	Alkbh5	0.443425	6.87964	3.5e-07	4.51e-06	alkB homolog 5, RNA demethylase	protein coding gene	ENSMUSG00000042650
P14_HC	Alpk1	current symbol	Alpk1	1.15731	3.84756	1.69e-10	4.79e-08	alpha-kinase 1	protein coding gene	ENSMUSG00000028028
P35_HC	Alpk1	current symbol	Alpk1	1.52885	3.69523	1.45e-07	4.16e-05	alpha-kinase 1	protein coding gene	ENSMUSG00000028028
P35_CB	Als2	current symbol	Als2	0.394567	8.37515	1.4e-05	0.000120236	alsin Rho guanine nucleotide exchange factor	protein coding gene	ENSMUSG00000026024
P35_CB	Als2cl	current symbol	Als2cl	-0.826051	3.93434	2.86e-06	2.97e-05	ALS2 C-terminal like	protein coding gene	ENSMUSG00000044037
P35_CB	Ambra1	current symbol	Ambra1	0.318896	6.45891	0.000523716	0.00275487	autophagy/beclin 1 regulator 1	protein coding gene	ENSMUSG00000040506
P35_CB	Amd2	current symbol	Amd2	2.72593	0.78153	1.14e-06	1.31e-05	S-adenosylmethionine decarboxylase 2	protein coding gene	ENSMUSG00000063953
P35_HC	Amd2	current symbol	Amd2	2.2202	1.34599	0.0002152	0.0218412	S-adenosylmethionine decarboxylase 2	protein coding gene	ENSMUSG00000063953
P35_CB	Amigo3	current symbol	Amigo3	-0.970536	3.09493	3.65e-05	0.000279295	adhesion molecule with Ig like domain 3	protein coding gene	ENSMUSG00000032593
P14_CB	Amotl1	current symbol	Amotl1	-0.35863	5.63621	0.00027834	0.0167004	angiomotin-like 1	protein coding gene	ENSMUSG00000013076
P35_CB	Amotl1	current symbol	Amotl1	-0.806479	5.56881	2.16e-13	8.33e-12	angiomotin-like 1	protein coding gene	ENSMUSG00000013076
P35_HC	Amotl1	current symbol	Amotl1	-0.825125	5.12565	1.79e-05	0.00300778	angiomotin-like 1	protein coding gene	ENSMUSG00000013076
P35_CB	Amotl2	current symbol	Amotl2	0.31293	5.6064	0.00371285	0.0142444	angiomotin-like 2	protein coding gene	ENSMUSG00000032531
P35_CB	Amph	current symbol	Amph	0.414557	7.95455	2.79e-06	2.91e-05	amphiphysin	protein coding gene	ENSMUSG00000021314
P14_HC	Amy1	current symbol	Amy1	-0.566418	3.93718	0.00111908	0.0300938	amylase 1, salivary	protein coding gene	ENSMUSG00000074264
P35_CB	Amy1	current symbol	Amy1	-2.63751	3.72715	9.5e-35	1.62e-32	amylase 1, salivary	protein coding gene	ENSMUSG00000074264
P35_CB	Anapc11	current symbol	Anapc11	0.369347	5.44	0.000905029	0.00436707	anaphase promoting complex subunit 11	protein coding gene	ENSMUSG00000025135
P35_CB	Anapc2	current symbol	Anapc2	0.318349	6.52628	0.000496404	0.00263695	anaphase promoting complex subunit 2	protein coding gene	ENSMUSG00000026965
P35_CB	Anapc4	current symbol	Anapc4	-0.303358	5.76808	0.00354324	0.0137073	anaphase promoting complex subunit 4	protein coding gene	ENSMUSG00000029176
P35_CB	Anapc7	current symbol	Anapc7	0.340528	5.44662	0.00242442	0.00994704	anaphase promoting complex subunit 7	protein coding gene	ENSMUSG00000029466
P35_CB	Angptl2	current symbol	Angptl2	-0.891148	2.92489	0.00032662	0.00183939	angiopoietin-like 2	protein coding gene	ENSMUSG00000004105
P35_CB	Ank1	current symbol	Ank1	0.293274	9.34517	0.00272405	0.0109661	ankyrin 1, erythroid	protein coding gene	ENSMUSG00000031543
P35_CB	Ankdd1b	current symbol	Ankdd1b	0.572333	3.26671	0.00925439	0.0302321	ankyrin repeat and death domain containing 1B	protein coding gene	ENSMUSG00000047117
P35_CB	Ankhd1	current symbol	Ankhd1	-0.283658	6.79127	0.00116016	0.00534745	ankyrin repeat and KH domain containing 1	protein coding gene	ENSMUSG00000024483
P35_CB	Ankra2	current symbol	Ankra2	-0.465718	4.8762	0.000413905	0.00225647	ankyrin repeat, family A (RFXANK-like), 2	protein coding gene	ENSMUSG00000021661
P35_CB	Ankrd10	current symbol	Ankrd10	-0.640699	5.24242	7.7e-08	1.17e-06	ankyrin repeat domain 10	protein coding gene	ENSMUSG00000031508
P35_CB	Ankrd12	current symbol	Ankrd12	-0.28778	6.88039	0.000879596	0.00426573	ankyrin repeat domain 12	protein coding gene	ENSMUSG00000034647
P35_CB	Ankrd13b	current symbol	Ankrd13b	-0.591215	6.16775	9.63e-10	2.05e-08	ankyrin repeat domain 13b	protein coding gene	ENSMUSG00000037907
P35_CB	Ankrd13d	current symbol	Ankrd13d	-0.292414	5.26031	0.014619	0.043547	ankyrin repeat domain 13 family, member D	protein coding gene	ENSMUSG00000005986
P35_CB	Ankrd16	current symbol	Ankrd16	-0.848566	4.10889	3.44e-07	4.44e-06	ankyrin repeat domain 16	protein coding gene	ENSMUSG00000047909
P35_CB	Ankrd17	current symbol	Ankrd17	0.324995	7.46544	0.000152912	0.000954423	ankyrin repeat domain 17	protein coding gene	ENSMUSG00000055204
P35_CB	Ankrd24	current symbol	Ankrd24	-0.656146	4.40129	1.36e-05	0.000117441	ankyrin repeat domain 24	protein coding gene	ENSMUSG00000054708
P35_CB	Ankrd28	current symbol	Ankrd28	-0.344854	6.3094	0.000226413	0.00134031	ankyrin repeat domain 28	protein coding gene	ENSMUSG00000014496
P35_CB	Ankrd32	old symbol	Slf1	-1.00112	4.4427	3.08e-11	8.6e-10	SMC5-SMC6 complex localization factor 1	protein coding gene	ENSMUSG00000021597
P35_CB	Ankrd34a	current symbol	Ankrd34a	0.672458	6.05439	6.63e-12	2.04e-10	ankyrin repeat domain 34A	protein coding gene	ENSMUSG00000049097
P35_CB	Ankrd52	current symbol	Ankrd52	0.283785	6.83616	0.00113214	0.00523798	ankyrin repeat domain 52	protein coding gene	ENSMUSG00000014498
P35_CB	Ankrd53	current symbol	Ankrd53	-0.90857	2.00904	0.00685141	0.0236727	ankyrin repeat domain 53	protein coding gene	ENSMUSG00000014747
P35_CB	Ankrd54	current symbol	Ankrd54	0.382897	4.30184	0.012506	0.0384155	ankyrin repeat domain 54	protein coding gene	ENSMUSG00000033055
P35_CB	Ankrd56	old symbol	Sowahb	0.509899	5.87248	5.12e-07	6.44e-06	sosondowah ankyrin repeat domain family member B	protein coding gene	ENSMUSG00000045314
P35_HC	Ankrd56	old symbol	Sowahb	1.51558	2.80053	7.2e-05	0.00920673	sosondowah ankyrin repeat domain family member B	protein coding gene	ENSMUSG00000045314
P35_CB	Anks3	current symbol	Anks3	-0.35551	5.22939	0.00266572	0.0107635	ankyrin repeat and sterile alpha motif domain containing 3	protein coding gene	ENSMUSG00000022515
P35_CB	Ankzf1	current symbol	Ankzf1	-1.0994	4.47951	2.14e-13	8.25e-12	ankyrin repeat and zinc finger domain containing 1	protein coding gene	ENSMUSG00000026199
P14_CB	Anln	current symbol	Anln	-0.489084	5.05399	7.04e-06	0.000796045	anillin, actin binding protein	protein coding gene	ENSMUSG00000036777
P35_CB	Anln	current symbol	Anln	-0.405099	5.61805	0.000135472	0.000866359	anillin, actin binding protein	protein coding gene	ENSMUSG00000036777
P35_CB	Ano1	current symbol	Ano1	-1.7443	1.41321	4.8e-05	0.000352361	anoctamin 1, calcium activated chloride channel	protein coding gene	ENSMUSG00000031075
P35_CB	Ano3	current symbol	Ano3	-1.45594	3.69356	1.45e-13	5.69e-12	anoctamin 3	protein coding gene	ENSMUSG00000074968
P35_HC	Ano3	current symbol	Ano3	-1.02394	5.78595	1.4e-09	6.46e-07	anoctamin 3	protein coding gene	ENSMUSG00000074968
P35_CB	Ano6	current symbol	Ano6	-0.347909	4.50844	0.0166679	0.0486505	anoctamin 6	protein coding gene	ENSMUSG00000064210
P35_CB	Ano8	current symbol	Ano8	-0.426873	6.24254	7.83e-06	7.23e-05	anoctamin 8	protein coding gene	ENSMUSG00000034863
P35_CB	Anp32a	current symbol	Anp32a	0.227426	7.93801	0.010042	0.0323814	acidic (leucine-rich) nuclear phosphoprotein 32 family, member A	protein coding gene	ENSMUSG00000032249
P35_CB	Anubl1	old symbol	Zfand4	-1.1589	2.72302	1.73e-05	0.000144993	zinc finger, AN1-type domain 4	protein coding gene	ENSMUSG00000042213
P35_CB	Anxa6	current symbol	Anxa6	0.562605	7.13127	4.61e-11	1.25e-09	annexin A6	protein coding gene	ENSMUSG00000018340
P35_CB	Aox1	current symbol	Aox1	-0.892917	3.15669	0.000109767	0.000728281	aldehyde oxidase 1	protein coding gene	ENSMUSG00000063558
P35_CB	Ap1b1	current symbol	Ap1b1	0.395338	7.45838	3.95e-06	3.95e-05	adaptor protein complex AP-1, beta 1 subunit	protein coding gene	ENSMUSG00000009090
P35_CB	Ap1g1	current symbol	Ap1g1	0.287425	6.21768	0.00289915	0.0115537	adaptor protein complex AP-1, gamma 1 subunit	protein coding gene	ENSMUSG00000031731
P14_HC	Ap1g2	current symbol	Ap1g2	-0.701547	3.55711	0.000245667	0.00976755	adaptor protein complex AP-1, gamma 2 subunit	protein coding gene	ENSMUSG00000040701
P35_CB	Ap1g2	current symbol	Ap1g2	-1.80527	3.56608	1.61e-17	1.01e-15	adaptor protein complex AP-1, gamma 2 subunit	protein coding gene	ENSMUSG00000040701
P35_CB	Ap1s1	current symbol	Ap1s1	0.249227	6.12411	0.0104539	0.0334454	adaptor protein complex AP-1, sigma 1	protein coding gene	ENSMUSG00000004849
P35_CB	Ap2a1	current symbol	Ap2a1	0.376336	7.84973	1.83e-05	0.000152125	adaptor-related protein complex 2, alpha 1 subunit	protein coding gene	ENSMUSG00000060279
P35_CB	Ap2a2	current symbol	Ap2a2	0.512573	8.30569	1.55e-08	2.7e-07	adaptor-related protein complex 2, alpha 2 subunit	protein coding gene	ENSMUSG00000002957
P35_CB	Ap2b1	current symbol	Ap2b1	0.65263	8.51052	1.28e-12	4.38e-11	adaptor-related protein complex 2, beta 1 subunit	protein coding gene	ENSMUSG00000035152
P35_CB	Ap2m1	current symbol	Ap2m1	0.437382	8.84224	3.36e-06	3.43e-05	adaptor-related protein complex 2, mu 1 subunit	protein coding gene	ENSMUSG00000022841
P35_CB	Ap2s1	current symbol	Ap2s1	0.492363	6.3991	8.63e-08	1.3e-06	adaptor-related protein complex 2, sigma 1 subunit	protein coding gene	ENSMUSG00000008036
P35_CB	Ap3b1	current symbol	Ap3b1	0.276233	5.4951	0.0142104	0.0424987	adaptor-related protein complex 3, beta 1 subunit	protein coding gene	ENSMUSG00000021686
P35_CB	Ap3b2	current symbol	Ap3b2	0.398364	6.93294	3.89e-06	3.9e-05	adaptor-related protein complex 3, beta 2 subunit	protein coding gene	ENSMUSG00000062444
P35_CB	Ap3d1	current symbol	Ap3d1	0.412942	7.79825	2.43e-06	2.58e-05	adaptor-related protein complex 3, delta 1 subunit	protein coding gene	ENSMUSG00000020198
P35_CB	Ap3m1	current symbol	Ap3m1	-0.505019	6.05381	2.47e-07	3.33e-06	adaptor-related protein complex 3, mu 1 subunit	protein coding gene	ENSMUSG00000021824
P35_CB	Ap3s1	current symbol	Ap3s1	-0.510305	5.7251	1.44e-06	1.61e-05	adaptor-related protein complex 3, sigma 1 subunit	protein coding gene	ENSMUSG00000024480
P35_CB	Ap4b1	current symbol	Ap4b1	-0.501218	4.21666	0.00192943	0.00823931	adaptor-related protein complex AP-4, beta 1	protein coding gene	ENSMUSG00000032952
P35_CB	Ap4e1	current symbol	Ap4e1	-0.794745	4.90603	1.16e-09	2.44e-08	adaptor-related protein complex AP-4, epsilon 1	protein coding gene	ENSMUSG00000001998
P35_CB	Apba2	current symbol	Apba2	0.211059	7.48798	0.0137964	0.0414814	amyloid beta (A4) precursor protein-binding, family A, member 2	protein coding gene	ENSMUSG00000030519
P35_CB	Apba3	current symbol	Apba3	-0.43163	4.18627	0.00780361	0.0263416	amyloid beta (A4) precursor protein-binding, family A, member 3	protein coding gene	ENSMUSG00000004931
P35_CB	Apbb1	current symbol	Apbb1	0.489179	8.60867	1.26e-07	1.82e-06	amyloid beta (A4) precursor protein-binding, family B, member 1	protein coding gene	ENSMUSG00000037032
P35_CB	Apbb2	current symbol	Apbb2	0.330029	5.01844	0.00918738	0.0300496	amyloid beta (A4) precursor protein-binding, family B, member 2	protein coding gene	ENSMUSG00000029207
P35_CB	Apbb3	current symbol	Apbb3	-0.356878	5.54793	0.00129188	0.00586634	amyloid beta (A4) precursor protein-binding, family B, member 3	protein coding gene	ENSMUSG00000117679
P14_HC	Apc	current symbol	Apc	0.490134	9.89135	4.76e-05	0.00267611	APC, WNT signaling pathway regulator	protein coding gene	ENSMUSG00000005871
P35_CB	Apc2	current symbol	Apc2	0.214883	7.67593	0.0130688	0.0397998	adenomatosis polyposis coli 2	protein coding gene	ENSMUSG00000020135
P35_CB	Apcdd1	current symbol	Apcdd1	-0.609356	4.53512	2.53e-05	0.000201375	adenomatosis polyposis coli down-regulated 1	protein coding gene	ENSMUSG00000071847
P35_CB	Aph1b	current symbol	Aph1b	-0.287575	5.82525	0.00504762	0.0183775	aph1 homolog B, gamma secretase subunit	protein coding gene	ENSMUSG00000032375
P14_CB	Aplnr	current symbol	Aplnr	0.597789	3.65702	6.33e-05	0.00504931	apelin receptor	protein coding gene	ENSMUSG00000044338
P35_CB	Aplp1	current symbol	Aplp1	0.243329	9.29441	0.0125617	0.0385339	amyloid beta (A4) precursor-like protein 1	protein coding gene	ENSMUSG00000006651
P35_CB	Aplp2	current symbol	Aplp2	0.30761	9.87567	0.00195719	0.0083318	amyloid beta (A4) precursor-like protein 2	protein coding gene	ENSMUSG00000031996
P14_HC	Apod	current symbol	Apod	-0.423996	5.16774	0.00101442	0.0278736	apolipoprotein D	protein coding gene	ENSMUSG00000022548
P14_CB	Apod	current symbol	Apod	-0.340329	6.75152	0.000166025	0.0112158	apolipoprotein D	protein coding gene	ENSMUSG00000022548
P35_CB	Apod	current symbol	Apod	-0.289186	7.54167	0.000767002	0.00381014	apolipoprotein D	protein coding gene	ENSMUSG00000022548
P35_CB	App	current symbol	App	0.349863	10.3962	0.000410609	0.00224395	amyloid beta (A4) precursor protein	protein coding gene	ENSMUSG00000022892
P35_CB	Appbp2	current symbol	Appbp2	0.334872	5.9251	0.00101681	0.00481173	amyloid beta precursor protein (cytoplasmic tail) binding protein 2	protein coding gene	ENSMUSG00000018481
P35_CB	Appl1	current symbol	Appl1	-0.355937	7.00198	3.34e-05	0.000257352	adaptor protein, phosphotyrosine interaction, PH domain and leucine zipper containing 1	protein coding gene	ENSMUSG00000040760
P35_CB	Appl2	current symbol	Appl2	-0.84629	8.44242	2.97e-20	2.29e-18	adaptor protein, phosphotyrosine interaction, PH domain and leucine zipper containing 2	protein coding gene	ENSMUSG00000020263
P35_CB	Aqp1	current symbol	Aqp1	-1.63452	2.23103	2.71e-07	3.6e-06	aquaporin 1	protein coding gene	ENSMUSG00000004655
P35_HC	Aqp1	current symbol	Aqp1	3.9014	2.10154	1.71e-11	1.03e-08	aquaporin 1	protein coding gene	ENSMUSG00000004655
P35_CB	Aqp11	current symbol	Aqp11	-1.23642	1.89555	0.000393348	0.00216101	aquaporin 11	protein coding gene	ENSMUSG00000042797
P14_HC	Aqp4	current symbol	Aqp4	0.443558	7.74161	4.2e-05	0.00243011	aquaporin 4	protein coding gene	ENSMUSG00000024411
P14_CB	Aqp4	current symbol	Aqp4	0.435351	9.8195	7.74e-05	0.00588024	aquaporin 4	protein coding gene	ENSMUSG00000024411
P35_CB	Aqp4	current symbol	Aqp4	-0.466994	8.94862	8.76e-07	1.03e-05	aquaporin 4	protein coding gene	ENSMUSG00000024411
P35_CB	Araf	current symbol	Araf	-0.360379	7.2084	2.31e-05	0.000186117	Araf proto-oncogene, serine/threonine kinase	protein coding gene	ENSMUSG00000001127
P14_HC	Arap2	current symbol	Arap2	0.426399	6.06187	0.000121315	0.0055926	ArfGAP with RhoGAP domain, ankyrin repeat and PH domain 2	protein coding gene	ENSMUSG00000037999
P35_CB	Arap2	current symbol	Arap2	-0.235111	7.0072	0.00607469	0.0214227	ArfGAP with RhoGAP domain, ankyrin repeat and PH domain 2	protein coding gene	ENSMUSG00000037999
P35_CB	Arap3	current symbol	Arap3	-0.937516	2.43184	0.00112145	0.00519481	ArfGAP with RhoGAP domain, ankyrin repeat and PH domain 3	protein coding gene	ENSMUSG00000024451
P14_HC	Arc	current symbol	Arc	0.399923	6.87724	0.000145853	0.00642495	activity regulated cytoskeletal-associated protein	protein coding gene	ENSMUSG00000022602
P35_HC	Arc	current symbol	Arc	0.845412	8.09043	2.45e-09	1.03e-06	activity regulated cytoskeletal-associated protein	protein coding gene	ENSMUSG00000022602
P35_CB	Arf1	current symbol	Arf1	0.281131	8.43178	0.00204008	0.00864103	ADP-ribosylation factor 1	protein coding gene	ENSMUSG00000048076
P35_CB	Arf3	current symbol	Arf3	0.534698	8.6181	7.67e-09	1.41e-07	ADP-ribosylation factor 3	protein coding gene	ENSMUSG00000051853
P35_CB	Arf5	current symbol	Arf5	0.246194	6.72865	0.00544427	0.0195621	ADP-ribosylation factor 5	protein coding gene	ENSMUSG00000020440
P35_CB	Arf6	current symbol	Arf6	-0.237135	6.23655	0.0126415	0.0387437	ADP-ribosylation factor 6	protein coding gene	ENSMUSG00000044147
P35_CB	Arg1	current symbol	Arg1	1.15907	1.51149	0.00269104	0.0108592	arginase, liver	protein coding gene	ENSMUSG00000019987
P35_CB	Arglu1	current symbol	Arglu1	-1.15424	6.31984	5.14e-34	8.24e-32	arginine and glutamate rich 1	protein coding gene	ENSMUSG00000040459
P35_CB	Arhgap1	current symbol	Arhgap1	0.273617	5.47766	0.0147782	0.0439531	Rho GTPase activating protein 1	protein coding gene	ENSMUSG00000027247
P35_CB	Arhgap11a	current symbol	Arhgap11a	-0.707509	2.34578	0.0172253	0.0499251	Rho GTPase activating protein 11A	protein coding gene	ENSMUSG00000041219
P35_CB	Arhgap21	current symbol	Arhgap21	-0.280282	8.26411	0.00189995	0.00813437	Rho GTPase activating protein 21	protein coding gene	ENSMUSG00000036591
P35_CB	Arhgap26	current symbol	Arhgap26	0.75127	8.08741	4.77e-17	2.84e-15	Rho GTPase activating protein 26	protein coding gene	ENSMUSG00000036452
P35_CB	Arhgap29	current symbol	Arhgap29	-0.920367	4.44994	6.42e-10	1.41e-08	Rho GTPase activating protein 29	protein coding gene	ENSMUSG00000039831
P14_HC	Arhgap5	current symbol	Arhgap5	0.396514	6.39353	0.000231414	0.0094431	Rho GTPase activating protein 5	protein coding gene	ENSMUSG00000035133
P35_CB	Arhgap5	current symbol	Arhgap5	-0.431195	8.51826	2.67e-06	2.81e-05	Rho GTPase activating protein 5	protein coding gene	ENSMUSG00000035133
P35_CB	Arhgdia	current symbol	Arhgdia	0.311668	7.50422	0.000301154	0.00171242	Rho GDP dissociation inhibitor (GDI) alpha	protein coding gene	ENSMUSG00000025132
P14_HC	Arhgef1	current symbol	Arhgef1	-0.434601	5.73658	0.000173797	0.00739758	Rho guanine nucleotide exchange factor (GEF) 1	protein coding gene	ENSMUSG00000040940
P35_CB	Arhgef1	current symbol	Arhgef1	-0.87087	5.53109	5.99e-15	2.87e-13	Rho guanine nucleotide exchange factor (GEF) 1	protein coding gene	ENSMUSG00000040940
P14_CB	Arhgef10	current symbol	Arhgef10	-0.362352	5.59126	0.000266583	0.0162781	Rho guanine nucleotide exchange factor (GEF) 10	protein coding gene	ENSMUSG00000071176
P35_CB	Arhgef11	current symbol	Arhgef11	0.410675	6.74397	3.19e-06	3.28e-05	Rho guanine nucleotide exchange factor (GEF) 11	protein coding gene	ENSMUSG00000041977
P35_CB	Arhgef15	current symbol	Arhgef15	-0.41033	4.21117	0.011342	0.0356192	Rho guanine nucleotide exchange factor (GEF) 15	protein coding gene	ENSMUSG00000052921
P35_CB	Arhgef18	current symbol	Arhgef18	0.611	6.17474	2.5e-10	5.93e-09	rho/rac guanine nucleotide exchange factor (GEF) 18	protein coding gene	ENSMUSG00000004568
P35_CB	Arhgef18	current symbol	Arhgef18	0.611	6.17474	2.5e-10	5.93e-09	rho/rac guanine nucleotide exchange factor (GEF) 18	protein coding gene	ENSMUSG00000074497
P35_CB	Arhgef7	current symbol	Arhgef7	0.295116	8.45834	0.00124053	0.00566367	Rho guanine nucleotide exchange factor (GEF7)	protein coding gene	ENSMUSG00000031511
P35_CB	Arid1a	current symbol	Arid1a	0.488258	7.19713	1e-08	1.81e-07	AT rich interactive domain 1A (SWI-like)	protein coding gene	ENSMUSG00000007880
P35_CB	Arid1b	current symbol	Arid1b	0.389249	6.76941	9.88e-06	8.82e-05	AT rich interactive domain 1B (SWI-like)	protein coding gene	ENSMUSG00000069729
P35_CB	Arid4a	current symbol	Arid4a	0.273987	5.56954	0.0119422	0.0371235	AT rich interactive domain 4A (RBP1-like)	protein coding gene	ENSMUSG00000048118
P35_CB	Arid4b	current symbol	Arid4b	-0.397396	6.36798	2.19e-05	0.000177056	AT rich interactive domain 4B (RBP1-like)	protein coding gene	ENSMUSG00000039219
P35_CB	Arid5a	current symbol	Arid5a	0.442585	3.86883	0.0137095	0.0412753	AT rich interactive domain 5A (MRF1-like)	protein coding gene	ENSMUSG00000037447
P35_CB	Arid5b	current symbol	Arid5b	0.437261	4.22334	0.0086916	0.0286995	AT rich interactive domain 5B (MRF1-like)	protein coding gene	ENSMUSG00000019947
P35_CB	Arl3	current symbol	Arl3	0.457929	6.19692	1.69e-06	1.86e-05	ADP-ribosylation factor-like 3	protein coding gene	ENSMUSG00000025035
P35_CB	Arl4a	current symbol	Arl4a	-0.609186	5.79456	5.13e-09	9.77e-08	ADP-ribosylation factor-like 4A	protein coding gene	ENSMUSG00000047446
P35_CB	Arl4c	current symbol	Arl4c	-0.28213	6.97064	0.00104312	0.00491384	ADP-ribosylation factor-like 4C	protein coding gene	ENSMUSG00000049866
P35_CB	Arl5a	current symbol	Arl5a	-0.387259	7.20917	5.66e-06	5.41e-05	ADP-ribosylation factor-like 5A	protein coding gene	ENSMUSG00000036093
P35_CB	Arl6ip1	current symbol	Arl6ip1	-0.292376	7.5057	0.00066804	0.00338591	ADP-ribosylation factor-like 6 interacting protein 1	protein coding gene	ENSMUSG00000030654
P35_CB	Arl6ip5	current symbol	Arl6ip5	0.219169	7.02887	0.0104427	0.0334257	ADP-ribosylation factor-like 6 interacting protein 5	protein coding gene	ENSMUSG00000035199
P35_CB	Armc7	current symbol	Armc7	0.677483	2.5513	0.0171909	0.049864	armadillo repeat containing 7	protein coding gene	ENSMUSG00000057219
P35_CB	Armc8	current symbol	Armc8	-0.325596	6.55276	0.00032131	0.00181327	armadillo repeat containing 8	protein coding gene	ENSMUSG00000032468
P35_CB	Armcx3	current symbol	Armcx3	-0.22488	6.55057	0.0135773	0.0409598	armadillo repeat containing, X-linked 3	protein coding gene	ENSMUSG00000049047
P35_CB	Arnt	current symbol	Arnt	-0.397317	5.91454	7.13e-05	0.000497983	aryl hydrocarbon receptor nuclear translocator	protein coding gene	ENSMUSG00000015522
P35_CB	Arnt2	current symbol	Arnt2	-0.23672	6.51232	0.00957432	0.0311189	aryl hydrocarbon receptor nuclear translocator 2	protein coding gene	ENSMUSG00000015709
P35_CB	Arntl	current symbol	Arntl	0.28115	5.4242	0.012437	0.0382299	aryl hydrocarbon receptor nuclear translocator-like	protein coding gene	ENSMUSG00000055116
P35_CB	Arntl2	current symbol	Arntl2	-1.3504	1.20352	0.00247131	0.0101046	aryl hydrocarbon receptor nuclear translocator-like 2	protein coding gene	ENSMUSG00000040187
P35_CB	Arpc1a	current symbol	Arpc1a	0.29373	6.71985	0.000971706	0.00464076	actin related protein 2/3 complex, subunit 1A	protein coding gene	ENSMUSG00000029621
P14_HC	Arpc1b	current symbol	Arpc1b	0.455593	5.54614	0.000147715	0.00646589	actin related protein 2/3 complex, subunit 1B	protein coding gene	ENSMUSG00000029622
P35_CB	Arpc2	current symbol	Arpc2	0.226825	6.79957	0.00963283	0.0312789	actin related protein 2/3 complex, subunit 2	protein coding gene	ENSMUSG00000006304
P35_CB	Arpc3	current symbol	Arpc3	0.42996	5.68227	4.77e-05	0.000350983	actin related protein 2/3 complex, subunit 3	protein coding gene	ENSMUSG00000029465
P35_CB	Arpc4	current symbol	Arpc4	0.467816	6.39098	4.45e-07	5.63e-06	actin related protein 2/3 complex, subunit 4	protein coding gene	ENSMUSG00000079426
P35_HC	Arpp19	current symbol	Arpp19	0.522884	7.2327	0.000233139	0.022745	cAMP-regulated phosphoprotein 19	protein coding gene	ENSMUSG00000007656
P35_CB	Arpp21	current symbol	Arpp21	0.246649	6.70209	0.00516407	0.0186805	cyclic AMP-regulated phosphoprotein, 21	protein coding gene	ENSMUSG00000032503
P35_HC	Arpp21	current symbol	Arpp21	0.545094	7.62375	0.000115836	0.013436	cyclic AMP-regulated phosphoprotein, 21	protein coding gene	ENSMUSG00000032503
P35_CB	Arrb1	current symbol	Arrb1	-0.219354	8.24886	0.0143581	0.0428836	arrestin, beta 1	protein coding gene	ENSMUSG00000018909
P35_CB	Arrdc1	current symbol	Arrdc1	-0.958481	3.23837	1.81e-05	0.000150174	arrestin domain containing 1	protein coding gene	ENSMUSG00000026972
P14_CB	Arrdc2	current symbol	Arrdc2	-0.691988	3.01097	0.000155843	0.0106467	arrestin domain containing 2	protein coding gene	ENSMUSG00000002910
P35_CB	Arsk	current symbol	Arsk	-0.653038	3.7215	0.000600265	0.00309238	arylsulfatase K	protein coding gene	ENSMUSG00000021592
P35_CB	Asah1	current symbol	Asah1	-0.53391	6.01363	7.56e-08	1.15e-06	N-acylsphingosine amidohydrolase 1	protein coding gene	ENSMUSG00000031591
P35_CB	Asap2	current symbol	Asap2	0.348278	6.25667	0.000204623	0.00122774	ArfGAP with SH3 domain, ankyrin repeat and PH domain 2	protein coding gene	ENSMUSG00000052632
P35_CB	Asb13	current symbol	Asb13	0.321843	5.95734	0.00118234	0.0054348	ankyrin repeat and SOCS box-containing 13	protein coding gene	ENSMUSG00000033781
P35_CB	Asna1	current symbol	Asna1	0.286467	6.29452	0.00238862	0.0098348	arsA arsenite transporter, ATP-binding, homolog 1 (bacterial)	protein coding gene	ENSMUSG00000052456
P35_CB	Asns	current symbol	Asns	0.319236	6.21587	0.00115183	0.00531268	asparagine synthetase	protein coding gene	ENSMUSG00000029752
P35_CB	Aspa	current symbol	Aspa	-0.575813	4.74712	2.46e-05	0.000196646	aspartoacylase	protein coding gene	ENSMUSG00000020774
P35_CB	Ass1	current symbol	Ass1	1.24922	2.84554	1.38e-06	1.55e-05	argininosuccinate synthetase 1	protein coding gene	ENSMUSG00000076441
P35_CB	Astn1	current symbol	Astn1	0.645544	6.7404	2.51e-13	9.57e-12	astrotactin 1	protein coding gene	ENSMUSG00000026587
P35_CB	Astn2	current symbol	Astn2	0.464322	7.49744	7.03e-08	1.08e-06	astrotactin 2	protein coding gene	ENSMUSG00000028373
P35_CB	Asxl2	current symbol	Asxl2	-0.270923	5.71968	0.0108116	0.0343617	additional sex combs like 2, transcriptional regulator	protein coding gene	ENSMUSG00000037486
P35_CB	Atad1	current symbol	Atad1	-0.412819	6.9544	1.67e-06	1.84e-05	ATPase family, AAA domain containing 1	protein coding gene	ENSMUSG00000013662
P35_CB	Atad2b	current symbol	Atad2b	-0.38315	5.58995	0.000411616	0.00224728	ATPase family, AAA domain containing 2B	protein coding gene	ENSMUSG00000052812
P35_CB	Atad5	current symbol	Atad5	-0.666086	3.60143	0.000761217	0.00378559	ATPase family, AAA domain containing 5	protein coding gene	ENSMUSG00000017550
P35_CB	Atcay	current symbol	Atcay	0.367796	7.30626	1.73e-05	0.000145054	ataxia, cerebellar, Cayman type	protein coding gene	ENSMUSG00000034958
P35_CB	Atf2	current symbol	Atf2	0.230852	6.78313	0.008478	0.028132	activating transcription factor 2	protein coding gene	ENSMUSG00000027104
P35_CB	Atf7ip	current symbol	Atf7ip	0.388392	6.57735	1.6e-05	0.000135433	activating transcription factor 7 interacting protein	protein coding gene	ENSMUSG00000030213
P35_CB	Atg16l2	current symbol	Atg16l2	-0.939369	4.15109	1.01e-08	1.81e-07	autophagy related 16-like 2 (S. cerevisiae)	protein coding gene	ENSMUSG00000047767
P35_CB	Atg2b	current symbol	Atg2b	0.49385	6.858	1.48e-08	2.59e-07	autophagy related 2B	protein coding gene	ENSMUSG00000041341
P35_CB	Atg4a	current symbol	Atg4a	-0.694139	2.79643	0.00823866	0.0275275	autophagy related 4A, cysteine peptidase	protein coding gene	ENSMUSG00000079418
P35_CB	Atg7	current symbol	Atg7	0.500659	4.57137	0.000518726	0.0027361	autophagy related 7	protein coding gene	ENSMUSG00000030314
P35_CB	Atg9a	current symbol	Atg9a	0.353718	7.24709	3.07e-05	0.000238942	autophagy related 9A	protein coding gene	ENSMUSG00000033124
P35_CB	Atic	current symbol	Atic	0.587333	4.56328	3.82e-05	0.000289664	5-aminoimidazole-4-carboxamide ribonucleotide formyltransferase/IMP cyclohydrolase	protein coding gene	ENSMUSG00000026192
P35_CB	Atl2	current symbol	Atl2	-0.227355	7.77343	0.00934382	0.0304799	atlastin GTPase 2	protein coding gene	ENSMUSG00000059811
P35_CB	Atl3	current symbol	Atl3	-0.541791	5.63958	4.53e-07	5.72e-06	atlastin GTPase 3	protein coding gene	ENSMUSG00000024759
P35_CB	Atmin	current symbol	Atmin	0.31719	6.20202	0.000876923	0.00425735	ATM interactor	protein coding gene	ENSMUSG00000047388
P35_CB	Atn1	current symbol	Atn1	0.553024	7.55481	1.49e-10	3.73e-09	atrophin 1	protein coding gene	ENSMUSG00000004263
P14_CB	Atp10a	current symbol	Atp10a	-0.804785	2.95868	1.74e-05	0.00171233	ATPase, class V, type 10A	protein coding gene	ENSMUSG00000025324
P35_CB	Atp10d	current symbol	Atp10d	-1.42068	1.30233	0.00060986	0.00313308	ATPase, class V, type 10D	polymorphic pseudogene	ENSMUSG00000046808
P35_CB	Atp11a	current symbol	Atp11a	-0.256005	6.72944	0.00374211	0.0143408	ATPase, class VI, type 11A	protein coding gene	ENSMUSG00000031441
P35_CB	Atp11b	current symbol	Atp11b	-1.38088	6.66588	2.7e-52	9.85e-50	ATPase, class VI, type 11B	protein coding gene	ENSMUSG00000037400
P35_CB	Atp11c	current symbol	Atp11c	-1.27627	5.03219	3.53e-23	3.19e-21	ATPase, class VI, type 11C	protein coding gene	ENSMUSG00000062949
P14_HC	Atp13a1	current symbol	Atp13a1	-0.395399	5.98371	0.000400938	0.0142287	ATPase type 13A1	protein coding gene	ENSMUSG00000031862
P35_CB	Atp13a1	current symbol	Atp13a1	-0.363576	5.89919	0.000333882	0.0018709	ATPase type 13A1	protein coding gene	ENSMUSG00000031862
P35_CB	Atp13a2	current symbol	Atp13a2	-0.277159	7.14575	0.00118961	0.0054608	ATPase type 13A2	protein coding gene	ENSMUSG00000036622
P35_CB	Atp13a3	current symbol	Atp13a3	-0.384258	6.75513	1.34e-05	0.000115861	ATPase type 13A3	protein coding gene	ENSMUSG00000022533
P35_CB	Atp13a4	current symbol	Atp13a4	-0.770258	4.36978	5.59e-07	6.93e-06	ATPase type 13A4	protein coding gene	ENSMUSG00000038094
P35_CB	Atp13a5	current symbol	Atp13a5	-1.30429	3.1774	2.4e-08	4.04e-07	ATPase type 13A5	protein coding gene	ENSMUSG00000048939
P35_CB	Atp1a1	current symbol	Atp1a1	0.418445	10.7025	2.32e-05	0.000186758	ATPase, Na+/K+ transporting, alpha 1 polypeptide	protein coding gene	ENSMUSG00000033161
P35_CB	Atp1a2	current symbol	Atp1a2	0.249418	10.4005	0.0118059	0.0367617	ATPase, Na+/K+ transporting, alpha 2 polypeptide	protein coding gene	ENSMUSG00000007097
P35_CB	Atp1a3	current symbol	Atp1a3	0.794552	11.1727	1.12e-15	5.86e-14	ATPase, Na+/K+ transporting, alpha 3 polypeptide	protein coding gene	ENSMUSG00000040907
P35_CB	Atp1b2	current symbol	Atp1b2	0.618994	10.4731	4.45e-10	1e-08	ATPase, Na+/K+ transporting, beta 2 polypeptide	protein coding gene	ENSMUSG00000041329
P35_CB	Atp2a2	current symbol	Atp2a2	0.36481	10.5851	0.000226356	0.00134031	ATPase, Ca++ transporting, cardiac muscle, slow twitch 2	protein coding gene	ENSMUSG00000029467
P35_CB	Atp2a3	current symbol	Atp2a3	0.358685	8.69348	0.00011292	0.000745903	ATPase, Ca++ transporting, ubiquitous	protein coding gene	ENSMUSG00000020788
P35_CB	Atp2b2	current symbol	Atp2b2	0.398451	9.882	6.1e-05	0.000435759	ATPase, Ca++ transporting, plasma membrane 2	protein coding gene	ENSMUSG00000030302
P35_CB	Atp2b3	current symbol	Atp2b3	0.314455	8.45339	0.000582233	0.00301446	ATPase, Ca++ transporting, plasma membrane 3	protein coding gene	ENSMUSG00000031376
P35_CB	Atp2b4	current symbol	Atp2b4	0.605096	5.90522	1.97e-09	4.01e-08	ATPase, Ca++ transporting, plasma membrane 4	protein coding gene	ENSMUSG00000026463
P35_CB	Atp2c1	current symbol	Atp2c1	-0.243275	7.23919	0.00415475	0.0156539	ATPase, Ca++-sequestering	protein coding gene	ENSMUSG00000032570
P35_CB	Atp5a1	current symbol	Atp5a1	0.338014	10.0845	0.00065618	0.00333835	ATP synthase, H+ transporting, mitochondrial F1 complex, alpha subunit 1	protein coding gene	ENSMUSG00000025428
P35_CB	Atp5b	current symbol	Atp5b	0.335817	10.6599	0.000682451	0.0034447	ATP synthase, H+ transporting mitochondrial F1 complex, beta subunit	protein coding gene	ENSMUSG00000025393
P35_CB	Atp5d	current symbol	Atp5d	0.287688	7.44612	0.000744725	0.00371042	ATP synthase, H+ transporting, mitochondrial F1 complex, delta subunit	protein coding gene	ENSMUSG00000003072
P35_CB	Atp5e	current symbol	Atp5e	0.473771	6.60568	1.23e-07	1.79e-06	ATP synthase, H+ transporting, mitochondrial F1 complex, epsilon subunit	protein coding gene	ENSMUSG00000016252
P35_CB	Atp5f1	current symbol	Atp5f1	0.267017	8.21504	0.00295517	0.0117423	ATP synthase, H+ transporting, mitochondrial F0 complex, subunit B1	protein coding gene	ENSMUSG00000000563
P35_CB	Atp5g1	current symbol	Atp5g1	0.277908	7.04562	0.00100206	0.00475029	ATP synthase, H+ transporting, mitochondrial F0 complex, subunit C1 (subunit 9)	protein coding gene	ENSMUSG00000006057
P35_CB	Atp5g2	current symbol	Atp5g2	0.267354	5.44174	0.0155937	0.045953	ATP synthase, H+ transporting, mitochondrial F0 complex, subunit C2 (subunit 9)	protein coding gene	ENSMUSG00000062683
P35_CB	Atp5g3	current symbol	Atp5g3	0.293995	8.22791	0.00106367	0.00499666	ATP synthase, H+ transporting, mitochondrial F0 complex, subunit C3 (subunit 9)	protein coding gene	ENSMUSG00000018770
P35_CB	Atp5h	current symbol	Atp5h	0.244506	7.68515	0.00482531	0.0177213	ATP synthase, H+ transporting, mitochondrial F0 complex, subunit D	protein coding gene	ENSMUSG00000034566
P35_CB	Atp5j2	current symbol	Atp5j2	0.559704	6.21899	3.31e-09	6.52e-08	ATP synthase, H+ transporting, mitochondrial F0 complex, subunit F2	protein coding gene	ENSMUSG00000038690
P35_CB	Atp5k	current symbol	Atp5k	0.344573	6.13501	0.000351756	0.00196047	ATP synthase, H+ transporting, mitochondrial F1F0 complex, subunit E	protein coding gene	ENSMUSG00000050856
P35_CB	Atp5l	current symbol	Atp5l	0.404135	6.13198	2.3e-05	0.000185439	ATP synthase, H+ transporting, mitochondrial F0 complex, subunit G	protein coding gene	ENSMUSG00000038717
P35_CB	Atp5o	current symbol	Atp5o	0.473093	7.67163	5.17e-08	8.14e-07	ATP synthase, H+ transporting, mitochondrial F1 complex, O subunit	protein coding gene	ENSMUSG00000022956
P35_CB	Atp5o	current symbol	Atp5o	0.473093	7.67163	5.17e-08	8.14e-07	ATP synthase, H+ transporting, mitochondrial F1 complex, O subunit	protein coding gene	ENSMUSG00000116933
P35_CB	Atp6v0a1	current symbol	Atp6v0a1	0.415386	8.70495	8.29e-06	7.58e-05	ATPase, H+ transporting, lysosomal V0 subunit A1	protein coding gene	ENSMUSG00000019302
P35_CB	Atp6v0c	current symbol	Atp6v0c	0.318375	9.1511	0.000943525	0.00452369	ATPase, H+ transporting, lysosomal V0 subunit C	protein coding gene	ENSMUSG00000024121
P35_CB	Atp6v0d1	current symbol	Atp6v0d1	0.464962	7.52929	7.34e-08	1.12e-06	ATPase, H+ transporting, lysosomal V0 subunit D1	protein coding gene	ENSMUSG00000013160
P35_CB	Atp6v0e	current symbol	Atp6v0e	-0.364135	4.42653	0.0162918	0.0476974	ATPase, H+ transporting, lysosomal V0 subunit E	protein coding gene	ENSMUSG00000015575
P35_CB	Atp6v1a	current symbol	Atp6v1a	0.29886	9.16686	0.0019392	0.00827351	ATPase, H+ transporting, lysosomal V1 subunit A	protein coding gene	ENSMUSG00000052459
P35_CB	Atp6v1b2	current symbol	Atp6v1b2	0.434082	9.08299	6.03e-06	5.71e-05	ATPase, H+ transporting, lysosomal V1 subunit B2	protein coding gene	ENSMUSG00000006273
P14_CB	Atp6v1e1	current symbol	Atp6v1e1	-0.424923	8.35101	2.63e-05	0.00238765	ATPase, H+ transporting, lysosomal V1 subunit E1	protein coding gene	ENSMUSG00000019210
P35_CB	Atp6v1f	current symbol	Atp6v1f	0.460553	5.98452	4.14e-06	4.11e-05	ATPase, H+ transporting, lysosomal V1 subunit F	protein coding gene	ENSMUSG00000004285
P35_CB	Atp6v1g2	current symbol	Atp6v1g2	0.226677	8.10111	0.0109254	0.0345929	ATPase, H+ transporting, lysosomal V1 subunit G2	protein coding gene	ENSMUSG00000024403
P35_CB	Atp8a2	current symbol	Atp8a2	0.561848	4.41059	0.00017965	0.00109694	ATPase, aminophospholipid transporter-like, class I, type 8A, member 2	protein coding gene	ENSMUSG00000021983
P35_CB	Atp8b2	current symbol	Atp8b2	-0.323917	6.54082	0.000391113	0.00215181	ATPase, class I, type 8B, member 2	protein coding gene	ENSMUSG00000060671
P35_CB	Atp9a	current symbol	Atp9a	0.494782	8.66742	9.89e-08	1.47e-06	ATPase, class II, type 9A	protein coding gene	ENSMUSG00000027546
P35_CB	Atp9b	current symbol	Atp9b	-0.307416	5.80863	0.002872	0.01148	ATPase, class II, type 9B	protein coding gene	ENSMUSG00000024566
P35_CB	Atpgd1	old symbol	Carns1	-0.637541	3.71916	0.000664348	0.003371	carnosine synthase 1	protein coding gene	ENSMUSG00000075289
P35_CB	Atpif1	current symbol	Atpif1	0.304538	6.17782	0.00137431	0.00618231	ATPase inhibitory factor 1	protein coding gene	ENSMUSG00000054428
P35_CB	Atr	current symbol	Atr	-0.86137	4.75494	3.34e-10	7.69e-09	ataxia telangiectasia and Rad3 related	protein coding gene	ENSMUSG00000032409
P35_CB	Atrnl1	current symbol	Atrnl1	0.308719	6.61027	0.00055999	0.00291385	attractin like 1	protein coding gene	ENSMUSG00000054843
P35_CB	Atrx	current symbol	Atrx	-0.434914	8.10597	1.14e-06	1.31e-05	ATRX, chromatin remodeler	protein coding gene	ENSMUSG00000031229
P35_CB	Atxn10	current symbol	Atxn10	0.294816	7.74707	0.000756404	0.00376443	ataxin 10	protein coding gene	ENSMUSG00000016541
P35_CB	Atxn2	current symbol	Atxn2	0.411597	6.39212	8.59e-06	7.81e-05	ataxin 2	protein coding gene	ENSMUSG00000042605
P35_CB	Atxn2l	current symbol	Atxn2l	-0.431666	7.3007	3.99e-07	5.1e-06	ataxin 2-like	protein coding gene	ENSMUSG00000032637
P35_CB	Atxn3	current symbol	Atxn3	-0.374951	4.8131	0.00500488	0.0182663	ataxin 3	protein coding gene	ENSMUSG00000021189
P35_CB	Atxn7	current symbol	Atxn7	-0.541175	5.27229	4.84e-06	4.72e-05	ataxin 7	protein coding gene	ENSMUSG00000021738
P35_CB	Atxn7l2	current symbol	Atxn7l2	-0.913809	3.8573	6.42e-07	7.83e-06	ataxin 7-like 2	protein coding gene	ENSMUSG00000048997
P14_HC	AU021034	old symbol	Fam216b	1.38989	1.45217	2.59e-05	0.00163619	family with sequence similarity 216, member B	protein coding gene	ENSMUSG00000045655
P35_CB	AU022870	old symbol	Ccz1	-0.299987	5.3897	0.00881395	0.0290041	CCZ1 vacuolar protein trafficking and biogenesis associated	protein coding gene	ENSMUSG00000029617
P35_CB	AU040829	old symbol	Arhgap44	0.301829	7.48259	0.000459195	0.00246452	Rho GTPase activating protein 44	protein coding gene	ENSMUSG00000033389
P35_CB	AU041133	current symbol	AU041133	-0.734183	2.94476	0.00309127	0.0121861	expressed sequence AU041133	protein coding gene	ENSMUSG00000078435
P35_CB	Aup1	current symbol	Aup1	-0.364995	5.70936	0.000553681	0.00288771	ancient ubiquitous protein 1	protein coding gene	ENSMUSG00000068328
P14_HC	Auts2	current symbol	Auts2	-0.506735	6.18438	3.63e-06	0.000316399	autism susceptibility candidate 2	protein coding gene	ENSMUSG00000029673
P35_CB	Auts2	current symbol	Auts2	0.458705	6.36833	8.17e-07	9.65e-06	autism susceptibility candidate 2	protein coding gene	ENSMUSG00000029673
P35_CB	AW047730	current symbol	AW047730	-0.279984	5.41149	0.0147627	0.0439168	expressed sequence AW047730	unclassified non-coding RNA gene	ENSMUSG00000097428
P35_CB	AW146020	old symbol	Gcfc2	-0.928077	3.54609	4.93e-06	4.79e-05	GC-rich sequence DNA binding factor 2	protein coding gene	ENSMUSG00000035125
P35_CB	AW549877	current symbol	AW549877	-0.466976	7.1061	4.4e-08	7.02e-07	expressed sequence AW549877	protein coding gene	ENSMUSG00000041935
P35_CB	AW551984	current symbol	AW551984	2.67734	0.902237	7.95e-07	9.43e-06	expressed sequence AW551984	protein coding gene	ENSMUSG00000038112
P35_CB	AW555464	old symbol	Cep170b	0.484728	7.83291	3.43e-08	5.58e-07	centrosomal protein 170B	protein coding gene	ENSMUSG00000072825
P14_HC	Aytl1b	old symbol	Lpcat2b	1.30198	1.85513	1.6e-05	0.00110127	lysophosphatidylcholine acyltransferase 2B	protein coding gene	ENSMUSG00000033794
P14_CB	Aytl1b	old symbol	Lpcat2b	1.15829	1.0748	6.5e-05	0.00511269	lysophosphatidylcholine acyltransferase 2B	protein coding gene	ENSMUSG00000033794
P35_HC	Aytl1b	old symbol	Lpcat2b	5.51289	2.40147	2.74e-17	4.2e-14	lysophosphatidylcholine acyltransferase 2B	protein coding gene	ENSMUSG00000033794
P35_CB	Azi2	current symbol	Azi2	-0.296352	6.41647	0.00122354	0.0055918	5-azacytidine induced gene 2	protein coding gene	ENSMUSG00000039285
P35_CB	B230206F22Rik	old symbol	Ftx	-1.86897	4.96205	2.23e-43	5.57e-41	Ftx transcript, Xist regulator (non-protein coding)	lincRNA gene	ENSMUSG00000086370
P35_CB	B230315N10Rik	old symbol	Zfp938	-0.859172	4.55547	3.25e-09	6.41e-08	zinc finger protein 938	protein coding gene	ENSMUSG00000062931
P35_CB	B230380D07Rik	old symbol	Mindy2	-0.241081	8.52316	0.00868673	0.0286905	MINDY lysine 48 deubiquitinase 2	protein coding gene	ENSMUSG00000042444
P35_CB	B2m	current symbol	B2m	-0.98431	5.15854	9.71e-16	5.11e-14	beta-2 microglobulin	protein coding gene	ENSMUSG00000060802
P35_CB	B3galnt2	current symbol	B3galnt2	-0.703272	5.10897	1.23e-08	2.19e-07	UDP-GalNAc:betaGlcNAc beta 1,3-galactosaminyltransferase, polypeptide 2	protein coding gene	ENSMUSG00000039242
P35_CB	B3galt1	current symbol	B3galt1	-0.405702	4.97494	0.00152413	0.00675041	UDP-Gal:betaGlcNAc beta 1,3-galactosyltransferase, polypeptide 1	protein coding gene	ENSMUSG00000034780
P35_CB	B3galt2	current symbol	B3galt2	-0.843053	4.22932	1.45e-07	2.06e-06	UDP-Gal:betaGlcNAc beta 1,3-galactosyltransferase, polypeptide 2	protein coding gene	ENSMUSG00000033849
P35_CB	B3gat1	current symbol	B3gat1	-0.379838	6.01193	0.00011595	0.000762183	beta-1,3-glucuronyltransferase 1 (glucuronosyltransferase P)	protein coding gene	ENSMUSG00000045994
P35_CB	B3gnt2	current symbol	B3gnt2	-0.582655	4.13268	0.000468629	0.00250418	UDP-GlcNAc:betaGal beta-1,3-N-acetylglucosaminyltransferase 2	protein coding gene	ENSMUSG00000051650
P35_CB	B3gnt5	current symbol	B3gnt5	-0.407821	5.15536	0.000797506	0.00392982	UDP-GlcNAc:betaGal beta-1,3-N-acetylglucosaminyltransferase 5	protein coding gene	ENSMUSG00000022686
P35_CB	B430010I23Rik	current symbol	B430010I23Rik	0.465016	4.60438	0.00109603	0.00511479	RIKEN cDNA B430010I23 gene	antisense lncRNA gene	ENSMUSG00000084960
P35_CB	B4galnt4	current symbol	B4galnt4	-0.600154	5.72835	1.47e-08	2.57e-07	beta-1,4-N-acetyl-galactosaminyl transferase 4	protein coding gene	ENSMUSG00000055629
P35_CB	B4galt1	current symbol	B4galt1	-0.711558	2.59729	0.00968641	0.0314377	UDP-Gal:betaGlcNAc beta 1,4- galactosyltransferase, polypeptide 1	protein coding gene	ENSMUSG00000028413
P35_CB	B630005N14Rik	old symbol	Bmt2	-0.445269	5.33065	0.000120103	0.000782612	base methyltransferase of 25S rRNA 2	protein coding gene	ENSMUSG00000042742
P35_CB	B930095G15Rik	current symbol	B930095G15Rik	-0.462844	5.40659	3.93e-05	0.000297025	RIKEN cDNA B930095G15 gene	sense intronic lncRNA gene	ENSMUSG00000085133
P35_CB	Bag3	current symbol	Bag3	0.921107	4.29467	4.88e-09	9.35e-08	BCL2-associated athanogene 3	protein coding gene	ENSMUSG00000030847
P35_CB	Bai1	old symbol	Adgrb1	-0.474453	7.41719	3.37e-08	5.48e-07	adhesion G protein-coupled receptor B1	protein coding gene	ENSMUSG00000034730
P14_HC	Baiap2l1	current symbol	Baiap2l1	-0.798909	3.10103	0.000349729	0.0126706	BAI1-associated protein 2-like 1	protein coding gene	ENSMUSG00000038859
P35_CB	Baiap3	current symbol	Baiap3	0.976823	2.60056	0.000608366	0.00312695	BAI1-associated protein 3	protein coding gene	ENSMUSG00000047507
P35_CB	Banf1	current symbol	Banf1	0.375948	5.33069	0.00106482	0.00499858	barrier to autointegration factor 1	protein coding gene	ENSMUSG00000024844
P35_CB	Banp	current symbol	Banp	0.392551	5.14739	0.00154686	0.00683314	BTG3 associated nuclear protein	protein coding gene	ENSMUSG00000025316
P35_CB	Barhl2	current symbol	Barhl2	0.558137	5.45368	6.82e-07	8.22e-06	BarH like homeobox 2	protein coding gene	ENSMUSG00000034384
P35_CB	Basp1	current symbol	Basp1	1.03846	4.22484	2.29e-10	5.46e-09	brain abundant, membrane attached signal protein 1	protein coding gene	ENSMUSG00000045763
P35_CB	Bat2	old symbol	Prrc2a	0.41364	8.79245	1.02e-05	9.06e-05	proline-rich coiled-coil 2A	protein coding gene	ENSMUSG00000024393
P35_CB	Bat2d	old symbol	Prrc2c	0.327098	7.87353	0.000203043	0.0012188	proline-rich coiled-coil 2C	protein coding gene	ENSMUSG00000040225
P35_CB	Bat2l	old symbol	Prrc2b	0.536218	9.11652	2.53e-08	4.23e-07	proline-rich coiled-coil 2B	protein coding gene	ENSMUSG00000039262
P35_CB	Bat3	old symbol	Bag6	0.448124	7.8168	3.36e-07	4.34e-06	BCL2-associated athanogene 6	protein coding gene	ENSMUSG00000024392
P35_CB	Bat5	old symbol	Abhd16a	-0.288608	7.7555	0.000989553	0.00470587	abhydrolase domain containing 16A	protein coding gene	ENSMUSG00000007036
P35_CB	Baz2b	current symbol	Baz2b	-0.246647	6.22982	0.0097745	0.0316855	bromodomain adjacent to zinc finger domain, 2B	protein coding gene	ENSMUSG00000026987
P35_CB	Bbox1	current symbol	Bbox1	-0.768874	2.49818	0.00603837	0.0213113	butyrobetaine (gamma), 2-oxoglutarate dioxygenase 1 (gamma-butyrobetaine hydroxylase)	protein coding gene	ENSMUSG00000041660
P35_CB	Bbs1	current symbol	Bbs1	0.366909	5.44964	0.00119159	0.00546802	Bardet-Biedl syndrome 1 (human)	protein coding gene	ENSMUSG00000006464
P35_CB	Bbs5	current symbol	Bbs5	-0.549151	3.35721	0.0110171	0.0347934	Bardet-Biedl syndrome 5 (human)	protein coding gene	ENSMUSG00000063145
P14_CB	Bbs7	current symbol	Bbs7	-0.500428	4.25299	0.000131003	0.00903917	Bardet-Biedl syndrome 7 (human)	protein coding gene	ENSMUSG00000037325
P35_CB	Bbs7	current symbol	Bbs7	-0.387862	4.26015	0.014844	0.0441198	Bardet-Biedl syndrome 7 (human)	protein coding gene	ENSMUSG00000037325
P35_CB	BC002059	current symbol	BC002059	-0.713783	3.07121	0.00255431	0.0103883	cDNA sequence BC002059	lincRNA gene	ENSMUSG00000060149
P35_CB	BC003267	old symbol	Zfp958	-0.663366	3.784	0.000366958	0.00203092	zinc finger protein 958	protein coding gene	ENSMUSG00000058748
P35_CB	BC003331	old symbol	Odr4	-0.445374	5.92059	1.04e-05	9.21e-05	odr4 GPCR localization factor homolog	protein coding gene	ENSMUSG00000006010
P35_CB	BC005561	current symbol	BC005561	-0.713247	4.73416	1.84e-07	2.53e-06	cDNA sequence BC005561	protein coding gene	ENSMUSG00000079065
P35_CB	BC005624	current symbol	BC005624	0.35919	6.02429	0.000265568	0.00153797	cDNA sequence BC005624	protein coding gene	ENSMUSG00000026851
P14_HC	BC005764	old symbol	Plppr3	-0.361105	6.24426	0.00087302	0.024926	phospholipid phosphatase related 3	protein coding gene	ENSMUSG00000035835
P35_CB	BC005764	old symbol	Plppr3	-0.370226	4.7141	0.00705094	0.0242131	phospholipid phosphatase related 3	protein coding gene	ENSMUSG00000035835
P35_CB	BC006779	old symbol	Helz2	-0.928601	2.03004	0.00423902	0.0159174	helicase with zinc finger 2, transcriptional coactivator	protein coding gene	ENSMUSG00000027580
P35_CB	BC011426	old symbol	Zfp959	-0.671836	3.15298	0.00309465	0.0121923	zinc finger protein 959	protein coding gene	ENSMUSG00000003198
P35_CB	BC016423	old symbol	Tasor2	-0.596715	5.73269	1.57e-08	2.72e-07	transcription activation suppressor family member 2	protein coding gene	ENSMUSG00000033799
P35_CB	BC016495	old symbol	Nmrk1	-1.0234	2.10519	0.00167347	0.00729917	nicotinamide riboside kinase 1	protein coding gene	ENSMUSG00000037847
P35_CB	BC017647	old symbol	Fam222b	0.517463	5.35579	8.06e-06	7.39e-05	family with sequence similarity 222, member B	protein coding gene	ENSMUSG00000037750
P35_CB	BC018507	old symbol	Ice1	-0.753495	7.1488	1.22e-18	8.54e-17	interactor of little elongation complex ELL subunit 1	protein coding gene	ENSMUSG00000034525
P35_CB	BC019943	old symbol	Tti2	-0.340108	5.11392	0.00600426	0.0212345	TELO2 interacting protein 2	protein coding gene	ENSMUSG00000031577
P35_CB	BC020535	old symbol	Ccm2l	-1.21192	1.32604	0.00322646	0.0126561	cerebral cavernous malformation 2-like	protein coding gene	ENSMUSG00000027474
P14_HC	BC022960	current symbol	BC022960	-0.860514	2.41304	0.000894281	0.0253246	cDNA sequence BC022960	pseudogene	ENSMUSG00000081137
P14_CB	BC022960	current symbol	BC022960	-0.725414	2.93443	0.000130503	0.00903917	cDNA sequence BC022960	pseudogene	ENSMUSG00000081137
P35_CB	BC022960	current symbol	BC022960	-1.4813	2.31862	2.37e-06	2.53e-05	cDNA sequence BC022960	pseudogene	ENSMUSG00000081137
P35_CB	BC023814	old symbol	Rrnad1	-0.311882	5.23156	0.00869616	0.0287076	ribosomal RNA adenine dimethylase domain containing 1	protein coding gene	ENSMUSG00000004896
P35_CB	BC023882	old symbol	Haus3	-0.774727	4.03479	6.6e-06	6.21e-05	HAUS augmin-like complex, subunit 3	protein coding gene	ENSMUSG00000079555
P35_CB	BC024479	old symbol	Msantd2	-1.21509	3.94091	1.19e-11	3.56e-10	Myb/SANT-like DNA-binding domain containing 2	protein coding gene	ENSMUSG00000042138
P35_CB	BC024978	current symbol	BC024978	0.462505	3.72742	0.0121069	0.0374887	cDNA sequence BC024978	protein coding gene	ENSMUSG00000078786
P35_CB	BC030336	old symbol	Mosmo	-0.377087	6.05631	0.000119917	0.000781815	modulator of smoothened	protein coding gene	ENSMUSG00000046096
P14_CB	BC031353	old symbol	Fam214a	-0.429336	6.32428	2.93e-06	0.000370796	family with sequence similarity 214, member A	protein coding gene	ENSMUSG00000034858
P35_CB	BC031353	old symbol	Fam214a	-0.504178	6.12604	1.94e-07	2.65e-06	family with sequence similarity 214, member A	protein coding gene	ENSMUSG00000034858
P35_CB	BC031441	old symbol	Zfp119b	-0.844132	2.26177	0.00584103	0.0207343	zinc finger protein 119b	protein coding gene	ENSMUSG00000062101
P35_CB	BC031748	old symbol	Fam199x	-0.569171	4.85355	1.74e-05	0.00014592	family with sequence similarity 199, X-linked	protein coding gene	ENSMUSG00000042595
P35_CB	BC032203	old symbol	Bicral	0.2452	6.38869	0.00838148	0.0278804	BRD4 interacting chromatin remodeling complex associated protein like	protein coding gene	ENSMUSG00000036568
P35_CB	BC037034	old symbol	Map11	-0.264315	5.51281	0.0164194	0.0480396	microtubule associated protein 11	protein coding gene	ENSMUSG00000036948
P35_CB	BC048355	old symbol	Dnph1	1.1618	1.39307	0.00420095	0.0157984	2'-deoxynucleoside 5'-phosphate N-hydrolase 1	protein coding gene	ENSMUSG00000040658
P35_CB	BC049349	old symbol	Zfp961	-0.417104	4.15284	0.0103777	0.033257	zinc finger protein 961	protein coding gene	ENSMUSG00000052446
P35_CB	BC049635	old symbol	Fam205c	-1.39729	1.59033	0.000411211	0.00224633	family with sequence similarity 205, member C	protein coding gene	ENSMUSG00000050141
P35_CB	BC049807	old symbol	Zfp948	-0.906512	3.39462	2.24e-05	0.000180907	zinc finger protein 948	protein coding gene	ENSMUSG00000067931
P35_CB	BC057022	old symbol	Fam222a	0.348709	5.08299	0.00503787	0.0183569	family with sequence similarity 222, member A	protein coding gene	ENSMUSG00000041930
P35_CB	BC059842	old symbol	Szt2	-0.434631	6.0099	1.11e-05	9.78e-05	SZT2 subunit of KICSTOR complex	protein coding gene	ENSMUSG00000033253
P35_CB	BC068157	old symbol	Prr36	0.562564	4.64392	5.48e-05	0.000395845	proline rich 36	protein coding gene	ENSMUSG00000064125
P35_CB	BC088983	old symbol	Cep44	-0.754889	3.46143	0.000246685	0.0014435	centrosomal protein 44	protein coding gene	ENSMUSG00000038215
P35_CB	Bcam	current symbol	Bcam	-0.963258	3.00056	7.49e-05	0.000519325	basal cell adhesion molecule	protein coding gene	ENSMUSG00000002980
P35_CB	Bcan	current symbol	Bcan	-0.343756	7.30384	6.01e-05	0.000430119	brevican	protein coding gene	ENSMUSG00000004892
P35_CB	Bcap29	current symbol	Bcap29	-0.469415	5.1119	0.00014593	0.000919359	B cell receptor associated protein 29	protein coding gene	ENSMUSG00000020650
P35_CB	Bcar1	current symbol	Bcar1	0.470077	7.64855	6.1e-08	9.43e-07	breast cancer anti-estrogen resistance 1	protein coding gene	ENSMUSG00000031955
P35_CB	Bcas3	current symbol	Bcas3	0.903938	5.62913	1.4e-16	8.02e-15	breast carcinoma amplified sequence 3	protein coding gene	ENSMUSG00000059439
P14_CB	Bcat1	current symbol	Bcat1	-0.542758	6.47772	2.6e-09	6.18e-07	branched chain aminotransferase 1, cytosolic	protein coding gene	ENSMUSG00000030268
P35_CB	Bcat1	current symbol	Bcat1	0.331654	6.60776	0.000244436	0.00143344	branched chain aminotransferase 1, cytosolic	protein coding gene	ENSMUSG00000030268
P14_HC	Bche	current symbol	Bche	0.911909	2.37265	0.000518219	0.0171618	butyrylcholinesterase	protein coding gene	ENSMUSG00000027792
P35_CB	Bche	current symbol	Bche	-0.716682	2.97718	0.00307406	0.012136	butyrylcholinesterase	protein coding gene	ENSMUSG00000027792
P35_CB	Bcl11b	current symbol	Bcl11b	1.98095	1.33516	1.57e-05	0.000132971	B cell leukemia/lymphoma 11B	protein coding gene	ENSMUSG00000048251
P35_CB	Bcl2	current symbol	Bcl2	0.513284	4.22035	0.00196177	0.00834866	B cell leukemia/lymphoma 2	protein coding gene	ENSMUSG00000057329
P35_CB	Bcl2l1	current symbol	Bcl2l1	0.445634	7.14804	1.64e-07	2.29e-06	BCL2-like 1	protein coding gene	ENSMUSG00000007659
P35_CB	Bcl2l11	current symbol	Bcl2l11	0.526907	4.09945	0.00144927	0.00646562	BCL2-like 11 (apoptosis facilitator)	protein coding gene	ENSMUSG00000027381
P14_CB	Bcl2l15	current symbol	Bcl2l15	-0.322935	5.99352	0.000680066	0.0348387	BCLl2-like 15	protein coding gene	ENSMUSG00000044165
P35_CB	Bcl2l15	current symbol	Bcl2l15	-0.744043	5.50344	2.55e-11	7.21e-10	BCLl2-like 15	protein coding gene	ENSMUSG00000044165
P35_CB	Bcl6	current symbol	Bcl6	1.02494	6.26211	7.14e-27	8.23e-25	B cell leukemia/lymphoma 6	protein coding gene	ENSMUSG00000022508
P35_CB	Bcl7b	current symbol	Bcl7b	0.30613	5.92112	0.00235816	0.00972256	B cell CLL/lymphoma 7B	protein coding gene	ENSMUSG00000029681
P35_CB	Bcl9l	current symbol	Bcl9l	0.423427	5.94123	2.37e-05	0.000190188	B cell CLL/lymphoma 9-like	protein coding gene	ENSMUSG00000063382
P35_CB	Bclaf1	current symbol	Bclaf1	-0.518666	7.51738	1.74e-09	3.58e-08	BCL2-associated transcription factor 1	protein coding gene	ENSMUSG00000037608
P35_CB	Bclp2	old symbol	Chil5	-1.14988	2.87167	5.53e-06	5.31e-05	chitinase-like 5	protein coding gene	ENSMUSG00000043873
P35_CB	Bcor	current symbol	Bcor	0.445868	4.84993	0.000601801	0.00309793	BCL6 interacting corepressor	protein coding gene	ENSMUSG00000040363
P35_CB	Bcorl1	current symbol	Bcorl1	0.909056	4.97397	1.68e-12	5.62e-11	BCL6 co-repressor-like 1	protein coding gene	ENSMUSG00000036959
P35_CB	Bcr	current symbol	Bcr	0.412937	6.44352	8.28e-06	7.58e-05	breakpoint cluster region	protein coding gene	ENSMUSG00000009681
P35_CB	Bdh1	current symbol	Bdh1	0.325704	6.51762	0.000320836	0.00181135	3-hydroxybutyrate dehydrogenase, type 1	protein coding gene	ENSMUSG00000046598
P35_CB	Bet1	current symbol	Bet1	-0.450546	4.49262	0.00204617	0.00866137	Bet1 golgi vesicular membrane trafficking protein	protein coding gene	ENSMUSG00000032757
P35_CB	Bet1l	current symbol	Bet1l	0.355978	4.54057	0.01314	0.0399142	Bet1 golgi vesicular membrane trafficking protein like	protein coding gene	ENSMUSG00000025484
P35_CB	Bex1	current symbol	Bex1	0.39957	5.0917	0.00141095	0.00631766	brain expressed X-linked 1	protein coding gene	ENSMUSG00000050071
P14_HC	Bhlhe22	current symbol	Bhlhe22	-0.53814	7.45333	4.43e-07	5.4e-05	basic helix-loop-helix family, member e22	protein coding gene	ENSMUSG00000025128
P35_CB	Bhlhe40	current symbol	Bhlhe40	0.354894	6.58901	9.8e-05	0.00065788	basic helix-loop-helix family, member e40	protein coding gene	ENSMUSG00000030103
P14_HC	Bicd1	current symbol	Bicd1	0.498149	4.64664	0.000572826	0.0183797	BICD cargo adaptor 1	protein coding gene	ENSMUSG00000003452
P35_CB	Birc2	current symbol	Birc2	-0.390888	5.86587	0.000119679	0.000781255	baculoviral IAP repeat-containing 2	protein coding gene	ENSMUSG00000057367
P35_CB	Blmh	current symbol	Blmh	0.330317	6.18298	0.000575971	0.00298434	bleomycin hydrolase	protein coding gene	ENSMUSG00000020840
P35_CB	Bloc1s1	current symbol	Bloc1s1	0.33777	5.2936	0.00392871	0.0149286	biogenesis of lysosomal organelles complex-1, subunit 1	protein coding gene	ENSMUSG00000090247
P35_CB	Bmi1	current symbol	Bmi1	-0.535781	5.90985	1.23e-07	1.79e-06	Bmi1 polycomb ring finger oncogene	protein coding gene	ENSMUSG00000026739
P14_HC	Bmp1	current symbol	Bmp1	-0.394589	6.20195	0.000293616	0.0111956	bone morphogenetic protein 1	protein coding gene	ENSMUSG00000022098
P35_CB	Bmp1	current symbol	Bmp1	-1.54876	7.59663	7.76e-69	6.15e-66	bone morphogenetic protein 1	protein coding gene	ENSMUSG00000022098
P14_HC	Bmp3	current symbol	Bmp3	1.10163	2.34922	3.16e-05	0.00190484	bone morphogenetic protein 3	protein coding gene	ENSMUSG00000029335
P35_CB	Bmp5	current symbol	Bmp5	-0.523411	3.45834	0.0133039	0.0403153	bone morphogenetic protein 5	protein coding gene	ENSMUSG00000032179
P35_CB	Bmp6	current symbol	Bmp6	-0.687352	3.28616	0.00193398	0.00825383	bone morphogenetic protein 6	protein coding gene	ENSMUSG00000039004
P35_CB	Bmpr1a	current symbol	Bmpr1a	-0.382736	6.55929	2.34e-05	0.00018823	bone morphogenetic protein receptor, type 1A	protein coding gene	ENSMUSG00000021796
P35_CB	Bmpr1b	current symbol	Bmpr1b	-0.520373	4.4059	0.000488779	0.00260052	bone morphogenetic protein receptor, type 1B	protein coding gene	ENSMUSG00000052430
P14_HC	Bmpr2	current symbol	Bmpr2	0.536293	5.30677	1.89e-05	0.00124719	bone morphogenetic protein receptor, type II (serine/threonine kinase)	protein coding gene	ENSMUSG00000067336
P35_HC	Bmpr2	current symbol	Bmpr2	-0.767805	5.38139	2.68e-05	0.00401764	bone morphogenetic protein receptor, type II (serine/threonine kinase)	protein coding gene	ENSMUSG00000067336
P35_CB	Bnip2	current symbol	Bnip2	-0.576528	5.43267	3.31e-07	4.29e-06	BCL2/adenovirus E1B interacting protein 2	protein coding gene	ENSMUSG00000011958
P35_CB	Bod1l	current symbol	Bod1l	0.28244	6.80361	0.00141069	0.00631766	biorientation of chromosomes in cell division 1-like	protein coding gene	ENSMUSG00000061755
P35_CB	Bola1	current symbol	Bola1	0.648969	2.91434	0.00813312	0.0272424	bolA-like 1 (E. coli)	protein coding gene	ENSMUSG00000015943
P35_CB	Bop1	current symbol	Bop1	0.333171	5.63084	0.00195677	0.0083318	block of proliferation 1	protein coding gene	ENSMUSG00000022557
P35_CB	Bptf	current symbol	Bptf	0.362456	7.39561	2.37e-05	0.000190188	bromodomain PHD finger transcription factor	protein coding gene	ENSMUSG00000040481
P35_CB	Brap	current symbol	Brap	0.275885	5.9318	0.00615692	0.0216787	BRCA1 associated protein	protein coding gene	ENSMUSG00000029458
P35_CB	Brcc3	current symbol	Brcc3	-0.493271	5.28012	2.84e-05	0.000222483	BRCA1/BRCA2-containing complex, subunit 3	protein coding gene	ENSMUSG00000031201
P35_CB	Brd3	current symbol	Brd3	0.261164	6.40347	0.00512654	0.018589	bromodomain containing 3	protein coding gene	ENSMUSG00000026918
P35_CB	Brd4	current symbol	Brd4	0.594338	6.67351	3.23e-11	8.95e-10	bromodomain containing 4	protein coding gene	ENSMUSG00000024002
P35_CB	Brd9	current symbol	Brd9	-0.617729	5.49787	3.76e-08	6.09e-07	bromodomain containing 9	protein coding gene	ENSMUSG00000057649
P35_CB	Bre	old symbol	Babam2	0.437429	4.5277	0.00271146	0.0109312	BRISC and BRCA1 A complex member 2	protein coding gene	ENSMUSG00000052139
P35_CB	Brp44l	old symbol	Mpc1	-0.228506	7.05139	0.0078907	0.026589	mitochondrial pyruvate carrier 1	protein coding gene	ENSMUSG00000023861
P35_CB	Brunol5	old symbol	Celf5	-0.550766	5.1193	6.83e-06	6.41e-05	CUGBP, Elav-like family member 5	protein coding gene	ENSMUSG00000034818
P35_CB	Brunol6	old symbol	Celf6	0.842667	2.16342	0.00836565	0.0278346	CUGBP, Elav-like family member 6	protein coding gene	ENSMUSG00000032297
P35_CB	Brwd1	current symbol	Brwd1	-0.225322	7.13431	0.00813741	0.02725	bromodomain and WD repeat domain containing 1	protein coding gene	ENSMUSG00000022914
P35_CB	Bsdc1	current symbol	Bsdc1	0.326239	6.07924	0.000876477	0.00425672	BSD domain containing 1	protein coding gene	ENSMUSG00000040859
P35_CB	Bsn	current symbol	Bsn	0.584825	8.90384	6.68e-10	1.46e-08	bassoon	protein coding gene	ENSMUSG00000032589
P35_CB	Btaf1	current symbol	Btaf1	-0.655661	5.94627	7.48e-11	1.99e-09	B-TFIID TATA-box binding protein associated factor 1	protein coding gene	ENSMUSG00000040565
P35_CB	Btbd1	current symbol	Btbd1	-0.437916	6.78407	6.46e-07	7.86e-06	BTB (POZ) domain containing 1	protein coding gene	ENSMUSG00000025103
P35_CB	Btbd12	old symbol	Slx4	0.331814	5.54601	0.00245061	0.0100362	SLX4 structure-specific endonuclease subunit homolog (S. cerevisiae)	protein coding gene	ENSMUSG00000039738
P35_CB	Btbd2	current symbol	Btbd2	0.275625	6.27605	0.00339856	0.0132311	BTB (POZ) domain containing 2	protein coding gene	ENSMUSG00000003344
P14_HC	Btbd3	current symbol	Btbd3	-0.369411	8.118	0.000820628	0.0238222	BTB (POZ) domain containing 3	protein coding gene	ENSMUSG00000062098
P35_CB	Btbd3	current symbol	Btbd3	0.33522	9.46736	0.000693239	0.00348871	BTB (POZ) domain containing 3	protein coding gene	ENSMUSG00000062098
P35_CB	Btbd9	current symbol	Btbd9	0.48878	6.27559	2.95e-07	3.89e-06	BTB (POZ) domain containing 9	protein coding gene	ENSMUSG00000062202
P35_CB	Btf3	current symbol	Btf3	0.27736	6.96035	0.00121069	0.00554245	basic transcription factor 3	protein coding gene	ENSMUSG00000021660
P35_CB	Btg1	current symbol	Btg1	0.225339	7.66417	0.00905989	0.029683	B cell translocation gene 1, anti-proliferative	protein coding gene	ENSMUSG00000036478
P35_HC	Btg2	current symbol	Btg2	0.889552	4.95858	8.02e-06	0.00149591	B cell translocation gene 2, anti-proliferative	protein coding gene	ENSMUSG00000020423
P35_CB	Bub3	current symbol	Bub3	0.382374	6.28398	5.6e-05	0.000402873	BUB3 mitotic checkpoint protein	protein coding gene	ENSMUSG00000066979
P35_CB	Bysl	current symbol	Bysl	0.431489	4.61267	0.00240679	0.00989579	bystin-like	protein coding gene	ENSMUSG00000023988
P14_HC	Bzrap1	old symbol	Tspoap1	-0.396502	7.97582	0.000296215	0.0112303	TSPO associated protein 1	protein coding gene	ENSMUSG00000034156
P35_CB	Bzrap1	old symbol	Tspoap1	-0.696554	7.71926	1.71e-15	8.7e-14	TSPO associated protein 1	protein coding gene	ENSMUSG00000034156
P35_CB	C030002C11Rik	old symbol	A330023F24Rik	-1.72573	5.50597	7.5e-50	2.47e-47	RIKEN cDNA A330023F24 gene	lncRNA gene	ENSMUSG00000096929
P35_CB	C030023E24Rik	current symbol	C030023E24Rik	-3.52241	4.15924	1.87e-67	1.4e-64	RIKEN cDNA C030023E24 gene	lncRNA gene
P35_CB	C030044B11Rik	old symbol	Fam120aos	-0.45657	4.97797	0.000419452	0.00228302	family with sequence similarity 120A, opposite strand	lincRNA gene	ENSMUSG00000097059
P35_CB	C030046E11Rik	old symbol	Ric1	-0.467854	6.09473	1.72e-06	1.89e-05	RAB6A GEF complex partner 1	protein coding gene	ENSMUSG00000038658
P35_CB	C030046I01Rik	old symbol	R3hdm4	0.299001	6.91908	0.00046194	0.00247433	R3H domain containing 4	protein coding gene	ENSMUSG00000035781
P35_CB	C030048H21Rik	current symbol	C030048H21Rik	-1.46691	1.28176	0.000783091	0.0038701	RIKEN cDNA C030048H21 gene	protein coding gene
P35_CB	C130074G19Rik	current symbol	C130074G19Rik	-1.00578	3.5663	6.62e-07	8.02e-06	RIKEN cDNA C130074G19 gene	protein coding gene	ENSMUSG00000039349
P35_CB	C1qb	current symbol	C1qb	-0.5685	3.48536	0.00572229	0.020361	complement component 1, q subcomponent, beta polypeptide	protein coding gene	ENSMUSG00000036905
P35_CB	C1qbp	current symbol	C1qbp	0.288614	5.85734	0.00516237	0.0186793	complement component 1, q subcomponent binding protein	protein coding gene	ENSMUSG00000018446
P14_HC	C1ql2	current symbol	C1ql2	-0.969405	5.13831	1.16e-13	6.99e-11	complement component 1, q subcomponent-like 2	protein coding gene	ENSMUSG00000036907
P14_HC	C1ql3	current symbol	C1ql3	-0.535521	7.02705	3.41e-07	4.3e-05	C1q-like 3	protein coding gene	ENSMUSG00000049630
P35_CB	C1ql3	current symbol	C1ql3	-0.334772	4.7536	0.011592	0.0362942	C1q-like 3	protein coding gene	ENSMUSG00000049630
P35_CB	C230004F18Rik	old symbol	Cdr1os	-0.936917	2.54324	0.000986065	0.00469365	cerebellar degeneration related antigen 1, opposite strand	non-coding RNA gene	ENSMUSG00000071753
P35_CB	C230057M02Rik	current symbol	C230057M02Rik	-0.972659	4.14842	3.48e-09	6.85e-08	RIKEN cDNA C230057M02 gene	lincRNA gene	ENSMUSG00000110523
P35_CB	C230081A13Rik	old symbol	Peak1	0.481158	6.76077	5.76e-08	8.94e-07	pseudopodium-enriched atypical kinase 1	protein coding gene	ENSMUSG00000074305
P35_CB	C230091D08Rik	old symbol	Snhg14	-0.414176	5.23568	0.000522879	0.00275262	small nucleolar RNA host gene 14	lncRNA gene	ENSMUSG00000100826
P35_CB	C2cd2l	current symbol	C2cd2l	0.36972	6.37451	6.97e-05	0.000488797	C2 calcium-dependent domain containing 2-like	protein coding gene	ENSMUSG00000032120
P35_CB	C2cd3	current symbol	C2cd3	0.472368	5.40583	4.78e-05	0.000351828	C2 calcium-dependent domain containing 3	protein coding gene	ENSMUSG00000047248
P35_CB	C330019G07Rik	old symbol	Prr14l	0.320304	6.44293	0.000519809	0.00273967	proline rich 14-like	protein coding gene	ENSMUSG00000054280
P35_CB	C330019L16Rik	old symbol	Zfp976	-0.8971	1.78392	0.0103603	0.0332172	zinc finger protein 976	protein coding gene	ENSMUSG00000074158
P35_CB	C430048L16Rik	old symbol	Rbm12b2	-0.525379	3.77952	0.00465094	0.017198	RNA binding motif protein 12 B2	protein coding gene	ENSMUSG00000052137
P35_CB	C78339	old symbol	Fam8a1	-0.364153	4.65666	0.00855658	0.028337	family with sequence similarity 8, member A1	protein coding gene	ENSMUSG00000069237
P35_CB	C80913	old symbol	Uri1	-0.46327	5.58403	1.94e-05	0.000159899	URI1, prefoldin-like chaperone	protein coding gene	ENSMUSG00000030421
P14_HC	Cab39l	current symbol	Cab39l	0.493459	4.66986	0.000600802	0.0190258	calcium binding protein 39-like	protein coding gene	ENSMUSG00000021981
P35_CB	Cab39l	current symbol	Cab39l	-0.321161	5.3974	0.004877	0.0179014	calcium binding protein 39-like	protein coding gene	ENSMUSG00000021981
P14_HC	Cables1	current symbol	Cables1	-0.474821	4.39993	0.00213057	0.0496419	CDK5 and Abl enzyme substrate 1	protein coding gene	ENSMUSG00000040957
P35_CB	Cabp1	current symbol	Cabp1	-0.294598	5.92099	0.00407325	0.0153955	calcium binding protein 1	protein coding gene	ENSMUSG00000029544
P35_CB	Cabp7	current symbol	Cabp7	-0.592621	4.50702	4.61e-05	0.000340633	calcium binding protein 7	protein coding gene	ENSMUSG00000009075
P35_CB	Cacna1d	current symbol	Cacna1d	-0.375743	6.27543	6.27e-05	0.000445796	calcium channel, voltage-dependent, L type, alpha 1D subunit	protein coding gene	ENSMUSG00000015968
P35_CB	Cacna1e	current symbol	Cacna1e	-0.580243	7.92379	5.33e-11	1.43e-09	calcium channel, voltage-dependent, R type, alpha 1E subunit	protein coding gene	ENSMUSG00000004110
P35_CB	Cacna1g	current symbol	Cacna1g	0.341273	8.91053	0.000302813	0.00172113	calcium channel, voltage-dependent, T type, alpha 1G subunit	protein coding gene	ENSMUSG00000020866
P14_HC	Cacna1h	current symbol	Cacna1h	-0.488644	6.89746	3.33e-06	0.000300402	calcium channel, voltage-dependent, T type, alpha 1H subunit	protein coding gene	ENSMUSG00000024112
P35_HC	Cacna1h	current symbol	Cacna1h	-0.519122	6.90293	0.000352981	0.0310331	calcium channel, voltage-dependent, T type, alpha 1H subunit	protein coding gene	ENSMUSG00000024112
P35_CB	Cacna2d1	current symbol	Cacna2d1	-0.418416	6.38205	7.78e-06	7.19e-05	calcium channel, voltage-dependent, alpha2/delta subunit 1	protein coding gene	ENSMUSG00000040118
P35_CB	Cacna2d2	current symbol	Cacna2d2	0.304681	7.54087	0.000359665	0.00199712	calcium channel, voltage-dependent, alpha 2/delta subunit 2	protein coding gene	ENSMUSG00000010066
P35_HC	Cacna2d2	current symbol	Cacna2d2	-0.766205	4.80711	0.000194627	0.0201988	calcium channel, voltage-dependent, alpha 2/delta subunit 2	protein coding gene	ENSMUSG00000010066
P35_CB	Cacna2d3	current symbol	Cacna2d3	-0.262869	5.97658	0.00824924	0.0275424	calcium channel, voltage-dependent, alpha2/delta subunit 3	protein coding gene	ENSMUSG00000021991
P35_CB	Cacnb1	current symbol	Cacnb1	0.395062	4.07331	0.0167137	0.0487103	calcium channel, voltage-dependent, beta 1 subunit	protein coding gene	ENSMUSG00000020882
P35_CB	Cacnb3	current symbol	Cacnb3	0.308386	6.29834	0.000932435	0.00447688	calcium channel, voltage-dependent, beta 3 subunit	protein coding gene	ENSMUSG00000003352
P35_CB	Cacnb4	current symbol	Cacnb4	-0.241631	8.98054	0.0109733	0.0347087	calcium channel, voltage-dependent, beta 4 subunit	protein coding gene	ENSMUSG00000017412
P14_HC	Cacng3	current symbol	Cacng3	-0.474046	5.71943	4.55e-05	0.00259752	calcium channel, voltage-dependent, gamma subunit 3	protein coding gene	ENSMUSG00000066189
P35_CB	Cacng3	current symbol	Cacng3	0.785074	2.8365	0.00195012	0.00830959	calcium channel, voltage-dependent, gamma subunit 3	protein coding gene	ENSMUSG00000066189
P35_HC	Cacng5	current symbol	Cacng5	-0.889243	4.374	0.000190208	0.0198897	calcium channel, voltage-dependent, gamma subunit 5	protein coding gene	ENSMUSG00000040373
P14_HC	Cacng6	current symbol	Cacng6	-2.64221	0.556868	2.22e-09	5.14e-07	calcium channel, voltage-dependent, gamma subunit 6	protein coding gene	ENSMUSG00000078815
P35_CB	Cadm2	current symbol	Cadm2	-0.31935	7.43751	0.000198097	0.00119443	cell adhesion molecule 2	protein coding gene	ENSMUSG00000064115
P35_CB	Cadm3	current symbol	Cadm3	0.324907	10.2491	0.00104369	0.00491476	cell adhesion molecule 3	protein coding gene	ENSMUSG00000005338
P35_CB	Cadps	current symbol	Cadps	0.242758	7.91216	0.00582714	0.0206904	Ca2+-dependent secretion activator	protein coding gene	ENSMUSG00000054423
P14_HC	Cadps2	current symbol	Cadps2	0.444433	6.55991	3.17e-05	0.00190484	Ca2+-dependent activator protein for secretion 2	protein coding gene	ENSMUSG00000017978
P35_CB	Cadps2	current symbol	Cadps2	0.381139	8.6543	4.01e-05	0.000302397	Ca2+-dependent activator protein for secretion 2	protein coding gene	ENSMUSG00000017978
P14_HC	Calb1	current symbol	Calb1	-0.401086	6.75238	0.000149227	0.00649114	calbindin 1	protein coding gene	ENSMUSG00000028222
P35_CB	Calb2	current symbol	Calb2	0.626889	9.07401	6.99e-11	1.86e-09	calbindin 2	protein coding gene	ENSMUSG00000003657
P35_CB	Calm3	current symbol	Calm3	0.295292	10.1025	0.00289468	0.0115427	calmodulin 3	protein coding gene	ENSMUSG00000019370
P14_HC	Calml4	current symbol	Calml4	1.12206	1.61357	0.000411417	0.0144894	calmodulin-like 4	protein coding gene	ENSMUSG00000032246
P35_CB	Calml4	current symbol	Calml4	-1.23252	1.50832	0.00154894	0.00683786	calmodulin-like 4	protein coding gene	ENSMUSG00000032246
P14_HC	Caln1	current symbol	Caln1	0.408806	5.87304	0.000318745	0.0118895	calneuron 1	protein coding gene	ENSMUSG00000060371
P35_CB	Caln1	current symbol	Caln1	0.243017	7.34833	0.00444271	0.0165369	calneuron 1	protein coding gene	ENSMUSG00000060371
P35_CB	Calr	current symbol	Calr	0.527309	8.09546	3.87e-09	7.49e-08	calreticulin	protein coding gene	ENSMUSG00000003814
P35_CB	Calu	current symbol	Calu	-0.219567	6.85797	0.011832	0.0368235	calumenin	protein coding gene	ENSMUSG00000029767
P35_CB	Caly	current symbol	Caly	0.487968	4.83925	0.000245472	0.00143764	calcyon neuron-specific vesicular protein	protein coding gene	ENSMUSG00000025468
P35_CB	Camk1	current symbol	Camk1	0.508885	5.62054	2.76e-06	2.89e-05	calcium/calmodulin-dependent protein kinase I	protein coding gene	ENSMUSG00000030272
P35_CB	Camk1d	current symbol	Camk1d	0.314137	6.65328	0.000413168	0.00225428	calcium/calmodulin-dependent protein kinase ID	protein coding gene	ENSMUSG00000039145
P14_HC	Camk2b	current symbol	Camk2b	-0.385983	10.3455	0.00132817	0.034448	calcium/calmodulin-dependent protein kinase II, beta	protein coding gene	ENSMUSG00000057897
P35_CB	Camk2b	current symbol	Camk2b	0.487923	9.68883	9.69e-07	1.13e-05	calcium/calmodulin-dependent protein kinase II, beta	protein coding gene	ENSMUSG00000057897
P14_HC	Camk2n1	current symbol	Camk2n1	-0.439203	9.19066	0.000187041	0.00784393	calcium/calmodulin-dependent protein kinase II inhibitor 1	protein coding gene	ENSMUSG00000046447
P35_CB	Camk2n1	current symbol	Camk2n1	-0.303904	7.52876	0.000406313	0.00222408	calcium/calmodulin-dependent protein kinase II inhibitor 1	protein coding gene	ENSMUSG00000046447
P35_HC	Camk2n1	current symbol	Camk2n1	0.544275	9.5304	0.00015872	0.0172505	calcium/calmodulin-dependent protein kinase II inhibitor 1	protein coding gene	ENSMUSG00000046447
P14_HC	Camkk1	current symbol	Camkk1	-0.369285	7.02464	0.0004284	0.0148677	calcium/calmodulin-dependent protein kinase kinase 1, alpha	protein coding gene	ENSMUSG00000020785
P35_CB	Camkk2	current symbol	Camkk2	0.359127	7.85032	4.24e-05	0.00031678	calcium/calmodulin-dependent protein kinase kinase 2, beta	protein coding gene	ENSMUSG00000029471
P35_CB	Camkv	current symbol	Camkv	1.64319	2.95155	1.49e-10	3.73e-09	CaM kinase-like vesicle-associated	protein coding gene	ENSMUSG00000032936
P35_CB	Camsap1	current symbol	Camsap1	0.494621	7.16589	7.1e-09	1.32e-07	calmodulin regulated spectrin-associated protein 1	protein coding gene	ENSMUSG00000026933
P35_CB	Camsap1l1	old symbol	Camsap2	0.245356	7.81459	0.00517742	0.0187187	calmodulin regulated spectrin-associated protein family, member 2	protein coding gene	ENSMUSG00000041570
P35_CB	Camta1	current symbol	Camta1	0.403544	8.605	1.25e-05	0.000108847	calmodulin binding transcription activator 1	protein coding gene	ENSMUSG00000014592
P35_CB	Camta2	current symbol	Camta2	0.570233	8.21187	2.38e-10	5.66e-09	calmodulin binding transcription activator 2	protein coding gene	ENSMUSG00000040712
P35_CB	Cand1	current symbol	Cand1	0.468439	7.32717	4.33e-08	6.92e-07	cullin associated and neddylation disassociated 1	protein coding gene	ENSMUSG00000020114
P35_CB	Cap1	current symbol	Cap1	0.300747	7.21521	0.000380425	0.00209856	CAP, adenylate cyclase-associated protein 1 (yeast)	protein coding gene	ENSMUSG00000028656
P35_CB	Capn11	current symbol	Capn11	-5.78133	1.87135	5.33e-24	5.17e-22	calpain 11	protein coding gene	ENSMUSG00000058626
P14_CB	Capn5	current symbol	Capn5	-0.444591	4.76579	0.000120793	0.00841892	calpain 5	protein coding gene	ENSMUSG00000035547
P35_CB	Capn7	current symbol	Capn7	-0.468696	5.95786	2.54e-06	2.69e-05	calpain 7	protein coding gene	ENSMUSG00000021893
P35_CB	Capns1	current symbol	Capns1	0.22774	7.18602	0.00755538	0.0256256	calpain, small subunit 1	protein coding gene	ENSMUSG00000001794
P35_CB	Caprin1	current symbol	Caprin1	0.229046	8.22941	0.0112747	0.035453	cell cycle associated protein 1	protein coding gene	ENSMUSG00000027184
P35_CB	Caprin2	current symbol	Caprin2	-0.683881	3.54161	0.000641473	0.00326986	caprin family member 2	protein coding gene	ENSMUSG00000030309
P35_CB	Capzb	current symbol	Capzb	0.260547	7.28145	0.00230112	0.00953108	capping protein (actin filament) muscle Z-line, beta	protein coding gene	ENSMUSG00000028745
P35_CB	Car10	current symbol	Car10	0.288602	7.54181	0.000853097	0.00415515	carbonic anhydrase 10	protein coding gene	ENSMUSG00000056158
P35_HC	Car10	current symbol	Car10	0.67679	5.53322	8.25e-05	0.0103567	carbonic anhydrase 10	protein coding gene	ENSMUSG00000056158
P35_CB	Car12	current symbol	Car12	-1.72023	3.01323	4.29e-12	1.35e-10	carbonic anhydrase 12	protein coding gene	ENSMUSG00000032373
P35_CB	Car13	current symbol	Car13	-0.905005	2.35081	0.00287498	0.0114846	carbonic anhydrase 13	protein coding gene	ENSMUSG00000027555
P35_CB	Car15	current symbol	Car15	-0.398873	4.25107	0.0107519	0.0342364	carbonic anhydrase 15	protein coding gene	ENSMUSG00000090236
P14_CB	Car3	current symbol	Car3	-2.06215	1.25494	8.47e-12	3e-09	carbonic anhydrase 3	protein coding gene	ENSMUSG00000027559
P35_HC	Car8	current symbol	Car8	1.95788	3.93119	2.45e-12	1.88e-09	carbonic anhydrase 8	protein coding gene	ENSMUSG00000041261
P35_CB	Casc4	current symbol	Casc4	-0.246735	6.4774	0.00731803	0.0249461	cancer susceptibility candidate 4	protein coding gene	ENSMUSG00000060227
P35_CB	Casp12	current symbol	Casp12	-1.43775	1.97104	3.44e-05	0.000264395	caspase 12	protein coding gene	ENSMUSG00000025887
P14_CB	Casr	current symbol	Casr	-0.761706	2.62859	0.000264644	0.0162315	calcium-sensing receptor	protein coding gene	ENSMUSG00000051980
P35_CB	Cav1	current symbol	Cav1	-1.2686	3.6208	2.26e-10	5.4e-09	caveolin 1, caveolae protein	protein coding gene	ENSMUSG00000007655
P35_CB	Cav2	current symbol	Cav2	-0.923762	3.62735	2.75e-06	2.88e-05	caveolin 2	protein coding gene	ENSMUSG00000000058
P35_CB	Cbfa2t2	current symbol	Cbfa2t2	0.259562	6.05564	0.00836208	0.0278296	CBFA2/RUNX1 translocation partner 2	protein coding gene	ENSMUSG00000038533
P35_CB	Cbfa2t3	current symbol	Cbfa2t3	0.518794	6.18765	5.7e-08	8.87e-07	CBFA2/RUNX1 translocation partner 3	protein coding gene	ENSMUSG00000006362
P35_HC	Cbl	current symbol	Cbl	-0.75359	5.01974	0.000140974	0.0154433	Casitas B-lineage lymphoma	protein coding gene	ENSMUSG00000034342
P14_HC	Cblb	current symbol	Cblb	-0.465116	5.20389	0.000262009	0.0102412	Casitas B-lineage lymphoma b	protein coding gene	ENSMUSG00000022637
P35_CB	Cblb	current symbol	Cblb	0.343712	5.26431	0.00387186	0.0147459	Casitas B-lineage lymphoma b	protein coding gene	ENSMUSG00000022637
P35_HC	Cbln1	current symbol	Cbln1	1.98813	3.42773	8.61e-10	4.1e-07	cerebellin 1 precursor protein	protein coding gene	ENSMUSG00000031654
P35_HC	Cbln3	current symbol	Cbln3	3.20568	3.20128	1.48e-16	1.86e-13	cerebellin 3 precursor protein	protein coding gene	ENSMUSG00000040380
P35_CB	Cbr1	current symbol	Cbr1	0.419443	5.29985	0.000336161	0.00188289	carbonyl reductase 1	protein coding gene	ENSMUSG00000051483
P14_CB	Cbs	current symbol	Cbs	-0.390922	5.08162	0.000281838	0.0167645	cystathionine beta-synthase	protein coding gene	ENSMUSG00000024039
P35_CB	Cbwd1	current symbol	Cbwd1	-0.450731	3.69738	0.0172096	0.0499076	COBW domain containing 1	protein coding gene	ENSMUSG00000024878
P35_CB	Cbx4	current symbol	Cbx4	0.365801	6.23038	0.000121288	0.000789917	chromobox 4	protein coding gene	ENSMUSG00000039989
P35_CB	Cbx6	current symbol	Cbx6	0.375944	8.81206	6.13e-05	0.00043715	chromobox 6	protein coding gene	ENSMUSG00000089715
P35_CB	Cc2d1b	current symbol	Cc2d1b	-0.892805	5.01052	2.29e-12	7.42e-11	coiled-coil and C2 domain containing 1B	protein coding gene	ENSMUSG00000028582
P35_CB	Cc2d2a	current symbol	Cc2d2a	-0.351686	5.0102	0.00532581	0.0191891	coiled-coil and C2 domain containing 2A	protein coding gene	ENSMUSG00000039765
P35_CB	Ccar1	current symbol	Ccar1	-0.289451	6.28868	0.00202694	0.00859347	cell division cycle and apoptosis regulator 1	protein coding gene	ENSMUSG00000020074
P14_HC	Ccbe1	current symbol	Ccbe1	-0.882111	4.38754	1.36e-08	2.51e-06	collagen and calcium binding EGF domains 1	protein coding gene	ENSMUSG00000046318
P35_CB	Ccdc108	old symbol	Cfap65	-2.0462	1.19502	9.32e-06	8.38e-05	cilia and flagella associated protein 65	protein coding gene	ENSMUSG00000047021
P35_CB	Ccdc109a	old symbol	Mcu	0.354346	4.57266	0.0161954	0.0474562	mitochondrial calcium uniporter	protein coding gene	ENSMUSG00000009647
P35_CB	Ccdc111	old symbol	Primpol	-0.681131	2.92753	0.00495575	0.0181246	primase and polymerase (DNA-directed)	protein coding gene	ENSMUSG00000038225
P35_CB	Ccdc114	current symbol	Ccdc114	-1.02673	1.35112	0.0108404	0.0344288	coiled-coil domain containing 114	protein coding gene	ENSMUSG00000040189
P35_CB	Ccdc117	current symbol	Ccdc117	0.417465	5.21996	0.000417868	0.00227716	coiled-coil domain containing 117	protein coding gene	ENSMUSG00000020482
P35_CB	Ccdc12	current symbol	Ccdc12	0.374054	4.82756	0.00462555	0.0171207	coiled-coil domain containing 12	protein coding gene	ENSMUSG00000019659
P35_CB	Ccdc124	current symbol	Ccdc124	0.350154	5.35801	0.00202424	0.00858471	coiled-coil domain containing 124	protein coding gene	ENSMUSG00000007721
P35_CB	Ccdc132	old symbol	Vps50	-0.380664	6.03284	0.000107644	0.000714551	VPS50 EARP/GARPII complex subunit	protein coding gene	ENSMUSG00000001376
P14_HC	Ccdc135	old symbol	Drc7	1.7436	1.6137	1.41e-07	1.95e-05	dynein regulatory complex subunit 7	protein coding gene	ENSMUSG00000031786
P35_CB	Ccdc135	old symbol	Drc7	-1.77389	1.87264	7.85e-07	9.33e-06	dynein regulatory complex subunit 7	protein coding gene	ENSMUSG00000031786
P35_HC	Ccdc135	old symbol	Drc7	1.5632	2.35107	0.000282696	0.0263653	dynein regulatory complex subunit 7	protein coding gene	ENSMUSG00000031786
P35_CB	Ccdc142	current symbol	Ccdc142	-0.775465	3.76893	2.99e-05	0.000233447	coiled-coil domain containing 142	protein coding gene	ENSMUSG00000107499
P35_CB	Ccdc148	current symbol	Ccdc148	-0.601445	2.88575	0.0156533	0.0460881	coiled-coil domain containing 148	protein coding gene	ENSMUSG00000036641
P14_HC	Ccdc153	current symbol	Ccdc153	2.09987	2.06407	2.85e-12	1.13e-09	coiled-coil domain containing 153	protein coding gene	ENSMUSG00000070306
P35_CB	Ccdc157	current symbol	Ccdc157	-0.464662	4.78713	0.000461386	0.00247234	coiled-coil domain containing 157	protein coding gene	ENSMUSG00000051427
P35_CB	Ccdc159	current symbol	Ccdc159	-0.777367	2.32854	0.00882967	0.0290337	coiled-coil domain containing 159	protein coding gene	ENSMUSG00000006241
P35_CB	Ccdc163	current symbol	Ccdc163	-2.25403	2.28161	7.52e-12	2.29e-10	coiled-coil domain containing 163	protein coding gene	ENSMUSG00000028689
P14_HC	Ccdc19	old symbol	Cfap45	1.40246	1.5502	1.73e-05	0.00116452	cilia and flagella associated protein 45	protein coding gene	ENSMUSG00000026546
P35_CB	Ccdc28a	current symbol	Ccdc28a	0.613763	3.51752	0.00246268	0.0100826	coiled-coil domain containing 28A	protein coding gene	ENSMUSG00000059554
P35_CB	Ccdc3	current symbol	Ccdc3	1.11044	2.90392	1.44e-05	0.000122929	coiled-coil domain containing 3	protein coding gene	ENSMUSG00000026676
P35_CB	Ccdc30	current symbol	Ccdc30	-0.801198	2.47151	0.00547845	0.0196647	coiled-coil domain containing 30	protein coding gene	ENSMUSG00000028637
P35_CB	Ccdc39	current symbol	Ccdc39	-1.77592	4.89583	5.56e-38	1.1e-35	coiled-coil domain containing 39	protein coding gene	ENSMUSG00000027676
P35_CB	Ccdc41	old symbol	Cep83	-0.653202	4.529	7.63e-06	7.05e-05	centrosomal protein 83	protein coding gene	ENSMUSG00000020024
P35_CB	Ccdc45	old symbol	Cep95	-0.891979	4.59235	3.52e-10	8.09e-09	centrosomal protein 95	protein coding gene	ENSMUSG00000018372
P35_CB	Ccdc46	old symbol	Cep112	-1.22749	1.13657	0.00602245	0.0212663	centrosomal protein 112	protein coding gene	ENSMUSG00000020728
P35_CB	Ccdc47	current symbol	Ccdc47	-0.236534	7.11106	0.00548903	0.0196921	coiled-coil domain containing 47	protein coding gene	ENSMUSG00000078622
P35_CB	Ccdc48	old symbol	Efcc1	-1.38488	1.33513	0.00092328	0.00444084	EF hand and coiled-coil domain containing 1	protein coding gene	ENSMUSG00000068263
P35_CB	Ccdc50	current symbol	Ccdc50	-0.427072	7.02972	5.84e-07	7.19e-06	coiled-coil domain containing 50	protein coding gene	ENSMUSG00000038127
P35_CB	Ccdc56	old symbol	Coa3	0.279367	5.33032	0.0166336	0.0485608	cytochrome C oxidase assembly factor 3	protein coding gene	ENSMUSG00000017188
P35_CB	Ccdc6	current symbol	Ccdc6	0.371688	5.85432	0.000283728	0.00162984	coiled-coil domain containing 6	protein coding gene	ENSMUSG00000048701
P35_CB	Ccdc62	current symbol	Ccdc62	-1.83438	1.64804	3.48e-06	3.53e-05	coiled-coil domain containing 62	protein coding gene	ENSMUSG00000061882
P35_CB	Ccdc64	old symbol	Bicdl1	-0.571778	4.83343	1.76e-05	0.000146963	BICD family like cargo adaptor 1	protein coding gene	ENSMUSG00000041609
P35_CB	Ccdc66	current symbol	Ccdc66	-0.39328	4.38824	0.00844987	0.0280594	coiled-coil domain containing 66	protein coding gene	ENSMUSG00000046753
P35_CB	Ccdc71	current symbol	Ccdc71	0.352819	5.12022	0.00394344	0.014972	coiled-coil domain containing 71	protein coding gene	ENSMUSG00000049305
P35_CB	Ccdc73	current symbol	Ccdc73	-0.782784	4.23843	9.83e-07	1.14e-05	coiled-coil domain containing 73	protein coding gene	ENSMUSG00000045106
P35_CB	Ccdc74a	current symbol	Ccdc74a	-0.430083	5.49268	0.000135525	0.000866359	coiled-coil domain containing 74A	protein coding gene	ENSMUSG00000041617
P35_CB	Ccdc76	old symbol	Trmt13	-0.586393	3.35795	0.00635445	0.0222521	tRNA methyltransferase 13	protein coding gene	ENSMUSG00000033439
P35_CB	Ccdc78	current symbol	Ccdc78	-1.99315	1.46314	2.95e-06	3.06e-05	coiled-coil domain containing 78	protein coding gene	ENSMUSG00000071202
P35_CB	Ccdc84	current symbol	Ccdc84	-0.971054	3.23977	1.26e-05	0.000109518	coiled-coil domain containing 84	protein coding gene	ENSMUSG00000043923
P14_HC	Ccdc85a	current symbol	Ccdc85a	-0.403468	6.7961	0.000131112	0.00592609	coiled-coil domain containing 85A	protein coding gene	ENSMUSG00000032878
P35_CB	Ccdc85a	current symbol	Ccdc85a	-0.345541	4.89509	0.0075034	0.0254749	coiled-coil domain containing 85A	protein coding gene	ENSMUSG00000032878
P35_CB	Ccdc85c	current symbol	Ccdc85c	-0.299049	5.65342	0.00533452	0.0192145	coiled-coil domain containing 85C	protein coding gene	ENSMUSG00000084883
P35_CB	Ccdc88a	current symbol	Ccdc88a	-0.253197	6.24594	0.00728723	0.0248662	coiled coil domain containing 88A	protein coding gene	ENSMUSG00000032740
P35_CB	Ccdc88c	current symbol	Ccdc88c	-0.574126	4.03317	0.000732054	0.00366217	coiled-coil domain containing 88C	protein coding gene	ENSMUSG00000021182
P35_CB	Ccdc92	current symbol	Ccdc92	0.574153	7.50953	2.81e-11	7.86e-10	coiled-coil domain containing 92	protein coding gene	ENSMUSG00000037979
P35_CB	Ccdc97	current symbol	Ccdc97	0.46051	5.66848	1.5e-05	0.000127997	coiled-coil domain containing 97	protein coding gene	ENSMUSG00000002608
P35_HC	Cckbr	current symbol	Cckbr	1.10092	3.9793	2.68e-05	0.00401764	cholecystokinin B receptor	protein coding gene	ENSMUSG00000030898
P14_HC	Ccl27a	current symbol	Ccl27a	-0.752116	4.21578	3.25e-06	0.000295665	chemokine (C-C motif) ligand 27A	protein coding gene	ENSMUSG00000073888
P14_CB	Ccl27a	current symbol	Ccl27a	-0.857724	2.78373	1.39e-05	0.00142177	chemokine (C-C motif) ligand 27A	protein coding gene	ENSMUSG00000073888
P35_CB	Ccnc	current symbol	Ccnc	-0.63891	5.23856	8.82e-08	1.33e-06	cyclin C	protein coding gene	ENSMUSG00000028252
P14_CB	Ccnd2	current symbol	Ccnd2	0.3982	6.51622	1.3e-05	0.00135012	cyclin D2	protein coding gene	ENSMUSG00000000184
P35_CB	Ccne2	current symbol	Ccne2	-0.450764	4.63845	0.00116827	0.00538114	cyclin E2	protein coding gene	ENSMUSG00000028212
P35_CB	Ccnf	current symbol	Ccnf	0.813363	2.3616	0.00500828	0.0182738	cyclin F	protein coding gene	ENSMUSG00000072082
P14_HC	Ccng1	current symbol	Ccng1	0.485492	5.97629	1.45e-05	0.00101358	cyclin G1	protein coding gene	ENSMUSG00000020326
P35_CB	Ccng1	current symbol	Ccng1	-0.258147	6.15365	0.00746592	0.0253889	cyclin G1	protein coding gene	ENSMUSG00000020326
P35_CB	Ccnjl	current symbol	Ccnjl	0.438352	4.00936	0.00950977	0.0309389	cyclin J-like	protein coding gene	ENSMUSG00000044707
P35_CB	Ccnl1	current symbol	Ccnl1	-1.16992	5.85861	4.56e-29	5.97e-27	cyclin L1	protein coding gene	ENSMUSG00000027829
P14_HC	Ccnl2	current symbol	Ccnl2	-0.391138	6.38279	0.000277654	0.0106825	cyclin L2	protein coding gene	ENSMUSG00000029068
P35_CB	Ccnl2	current symbol	Ccnl2	-1.41383	6.72744	8.26e-56	3.59e-53	cyclin L2	protein coding gene	ENSMUSG00000029068
P35_CB	Ccnt2	current symbol	Ccnt2	-0.966614	5.81984	2.23e-20	1.75e-18	cyclin T2	protein coding gene	ENSMUSG00000026349
P35_CB	Ccny	current symbol	Ccny	-0.283589	6.59591	0.00167111	0.00729123	cyclin Y	protein coding gene	ENSMUSG00000024286
P35_CB	Ccnyl1	current symbol	Ccnyl1	-0.502722	3.99195	0.00350278	0.0135687	cyclin Y-like 1	protein coding gene	ENSMUSG00000070871
P35_CB	Ccrl1	old symbol	Ackr4	-0.844018	2.14553	0.00789772	0.026606	atypical chemokine receptor 4	protein coding gene	ENSMUSG00000079355
P35_CB	Ccrn4l	old symbol	Noct	0.291298	5.20329	0.0149114	0.0442907	nocturnin	protein coding gene	ENSMUSG00000023087
P35_CB	Cct2	current symbol	Cct2	0.238815	7.09508	0.00522552	0.0188824	chaperonin containing Tcp1, subunit 2 (beta)	protein coding gene	ENSMUSG00000034024
P35_CB	Cct3	current symbol	Cct3	0.466972	7.07658	4.94e-08	7.83e-07	chaperonin containing Tcp1, subunit 3 (gamma)	protein coding gene	ENSMUSG00000001416
P35_CB	Cct5	current symbol	Cct5	0.32701	7.29984	0.000130301	0.000839332	chaperonin containing Tcp1, subunit 5 (epsilon)	protein coding gene	ENSMUSG00000022234
P35_CB	Cct6a	current symbol	Cct6a	0.264677	7.33479	0.00196266	0.00834982	chaperonin containing Tcp1, subunit 6a (zeta)	protein coding gene	ENSMUSG00000029447
P35_CB	Cct7	current symbol	Cct7	0.360342	7.36853	2.76e-05	0.000217077	chaperonin containing Tcp1, subunit 7 (eta)	protein coding gene	ENSMUSG00000030007
P35_CB	Cct8	current symbol	Cct8	0.206968	7.49143	0.0162625	0.0476426	chaperonin containing Tcp1, subunit 8 (theta)	protein coding gene	ENSMUSG00000025613
P35_CB	Cd164	current symbol	Cd164	-0.403499	6.41353	1.21e-05	0.000106031	CD164 antigen	protein coding gene	ENSMUSG00000019818
P35_CB	Cd247	current symbol	Cd247	-0.586159	4.93595	5.76e-06	5.49e-05	CD247 antigen	protein coding gene	ENSMUSG00000005763
P35_CB	Cd2ap	current symbol	Cd2ap	-0.921211	5.08106	1.97e-13	7.61e-12	CD2-associated protein	protein coding gene	ENSMUSG00000061665
P35_CB	Cd300a	current symbol	Cd300a	-1.01274	2.83175	7.08e-05	0.000495067	CD300A molecule	protein coding gene	ENSMUSG00000034652
P35_CB	Cd34	current symbol	Cd34	-0.877292	3.73117	3.78e-06	3.8e-05	CD34 antigen	protein coding gene	ENSMUSG00000016494
P14_CB	Cd44	current symbol	Cd44	0.662969	3.26807	5.78e-05	0.00472248	CD44 antigen	protein coding gene	ENSMUSG00000005087
P35_CB	Cd46	current symbol	Cd46	-3.06039	0.855625	8.1e-08	1.23e-06	CD46 antigen, complement regulatory protein	protein coding gene	ENSMUSG00000016493
P35_CB	Cd47	current symbol	Cd47	0.327583	6.41329	0.000348295	0.00194601	CD47 antigen (Rh-related antigen, integrin-associated signal transducer)	protein coding gene	ENSMUSG00000055447
P35_HC	Cd47	current symbol	Cd47	-0.615207	5.49728	0.000520991	0.0423628	CD47 antigen (Rh-related antigen, integrin-associated signal transducer)	protein coding gene	ENSMUSG00000055447
P35_CB	Cd55	current symbol	Cd55	-0.837607	1.89633	0.0124638	0.0383035	CD55 molecule, decay accelerating factor for complement	protein coding gene	ENSMUSG00000026399
P35_CB	Cd59a	current symbol	Cd59a	-0.747359	4.14378	5.61e-06	5.37e-05	CD59a antigen	protein coding gene	ENSMUSG00000032679
P35_CB	Cd93	current symbol	Cd93	-1.09076	2.82594	1.65e-05	0.000139356	CD93 antigen	protein coding gene	ENSMUSG00000027435
P35_CB	Cd97	old symbol	Adgre5	-0.696244	3.11708	0.00232428	0.00961817	adhesion G protein-coupled receptor E5	protein coding gene	ENSMUSG00000002885
P35_CB	Cdan1	current symbol	Cdan1	-0.60314	5.39187	1.58e-07	2.21e-06	congenital dyserythropoietic anemia, type I (human)	protein coding gene	ENSMUSG00000027284
P35_CB	Cdc14b	current symbol	Cdc14b	-1.02577	4.3722	3.7e-11	1.02e-09	CDC14 cell division cycle 14B	protein coding gene	ENSMUSG00000033102
P35_CB	Cdc25b	current symbol	Cdc25b	-0.695729	3.90449	0.000122431	0.000795862	cell division cycle 25B	protein coding gene	ENSMUSG00000027330
P35_CB	Cdc27	current symbol	Cdc27	-0.450032	5.97109	6.27e-06	5.92e-05	cell division cycle 27	protein coding gene	ENSMUSG00000020687
P35_CB	Cdc37	current symbol	Cdc37	0.460401	7.04843	7.49e-08	1.14e-06	cell division cycle 37	protein coding gene	ENSMUSG00000019471
P35_CB	Cdc37l1	current symbol	Cdc37l1	-0.336149	6.48745	0.000230037	0.00135747	cell division cycle 37-like 1	protein coding gene	ENSMUSG00000024780
P35_CB	Cdc42bpb	current symbol	Cdc42bpb	0.24516	7.62948	0.00473409	0.0174576	CDC42 binding protein kinase beta	protein coding gene	ENSMUSG00000021279
P35_CB	Cdc42bpg	current symbol	Cdc42bpg	-0.655605	6.46613	1.47e-12	4.98e-11	CDC42 binding protein kinase gamma (DMPK-like)	protein coding gene	ENSMUSG00000024769
P35_CB	Cdc42ep1	current symbol	Cdc42ep1	0.284138	6.04862	0.00380875	0.0145549	CDC42 effector protein (Rho GTPase binding) 1	protein coding gene	ENSMUSG00000049521
P35_CB	Cdc42ep4	current symbol	Cdc42ep4	0.261719	7.39402	0.0023139	0.00957812	CDC42 effector protein (Rho GTPase binding) 4	protein coding gene	ENSMUSG00000041598
P35_CB	Cdc5l	current symbol	Cdc5l	0.371557	6.32198	7.94e-05	0.000546306	cell division cycle 5-like (S. pombe)	protein coding gene	ENSMUSG00000023932
P35_CB	Cdc7	current symbol	Cdc7	-0.832716	4.8106	4.47e-10	1.01e-08	cell division cycle 7 (S. cerevisiae)	protein coding gene	ENSMUSG00000029283
P35_CB	Cdgap	old symbol	Arhgap31	0.585458	6.69983	6.19e-11	1.66e-09	Rho GTPase activating protein 31	protein coding gene	ENSMUSG00000022799
P35_CB	Cdh1	current symbol	Cdh1	-0.825651	3.55107	4.62e-05	0.000341024	cadherin 1	protein coding gene	ENSMUSG00000000303
P35_CB	Cdh13	current symbol	Cdh13	0.756703	3.27453	0.000465514	0.00248951	cadherin 13	protein coding gene	ENSMUSG00000031841
P35_CB	Cdh15	current symbol	Cdh15	0.303484	6.02151	0.00171636	0.0074573	cadherin 15	protein coding gene	ENSMUSG00000031962
P35_CB	Cdh19	current symbol	Cdh19	-0.639893	3.04055	0.00567344	0.0202621	cadherin 19, type 2	protein coding gene	ENSMUSG00000047216
P35_CB	Cdh2	current symbol	Cdh2	0.235821	6.65743	0.00803389	0.0269771	cadherin 2	protein coding gene	ENSMUSG00000024304
P35_CB	Cdh5	current symbol	Cdh5	-0.778448	3.43569	0.000186472	0.00113244	cadherin 5	protein coding gene	ENSMUSG00000031871
P14_CB	Cdh7	current symbol	Cdh7	0.355894	5.74354	0.000268682	0.016334	cadherin 7, type 2	protein coding gene	ENSMUSG00000026312
P14_CB	Cdh7	old symbol	Cdh20	0.355894	5.74354	0.000268682	0.016334	cadherin 20	protein coding gene	ENSMUSG00000050840
P14_CB	Cdh8	current symbol	Cdh8	0.368121	6.27815	6.52e-05	0.00511269	cadherin 8	protein coding gene	ENSMUSG00000036510
P35_CB	Cdipt	current symbol	Cdipt	0.223865	7.21908	0.00822012	0.027486	CDP-diacylglycerol--inositol 3-phosphatidyltransferase (phosphatidylinositol synthase)	protein coding gene	ENSMUSG00000030682
P35_CB	Cdk12	current symbol	Cdk12	0.426497	5.49523	0.000136937	0.000872902	cyclin-dependent kinase 12	protein coding gene	ENSMUSG00000003119
P35_CB	Cdk5r1	current symbol	Cdk5r1	0.263111	6.92699	0.00215018	0.00902888	cyclin-dependent kinase 5, regulatory subunit 1 (p35)	protein coding gene	ENSMUSG00000048895
P35_CB	Cdk5r2	current symbol	Cdk5r2	0.340182	6.75816	0.000114709	0.000755502	cyclin-dependent kinase 5, regulatory subunit 2 (p39)	protein coding gene	ENSMUSG00000090071
P35_CB	Cdk5rap2	current symbol	Cdk5rap2	-0.257357	5.54303	0.0170319	0.0495201	CDK5 regulatory subunit associated protein 2	protein coding gene	ENSMUSG00000039298
P14_HC	Cdk9	current symbol	Cdk9	-0.368339	6.15927	0.000780227	0.0227925	cyclin-dependent kinase 9 (CDC2-related kinase)	protein coding gene	ENSMUSG00000009555
P14_HC	Cdkl5	current symbol	Cdkl5	0.73334	5.29933	5.63e-09	1.18e-06	cyclin-dependent kinase-like 5	protein coding gene	ENSMUSG00000031292
P35_CB	Cdkl5	current symbol	Cdkl5	0.576587	4.84399	1.77e-05	0.000147794	cyclin-dependent kinase-like 5	protein coding gene	ENSMUSG00000031292
P14_HC	Cdkn1a	current symbol	Cdkn1a	-0.472122	4.6098	0.0012129	0.0319358	cyclin-dependent kinase inhibitor 1A (P21)	protein coding gene	ENSMUSG00000023067
P14_CB	Cdkn1a	current symbol	Cdkn1a	-0.597776	5.88278	4.59e-10	1.2e-07	cyclin-dependent kinase inhibitor 1A (P21)	protein coding gene	ENSMUSG00000023067
P35_CB	Cdkn1a	current symbol	Cdkn1a	0.958286	4.85692	5.83e-13	2.09e-11	cyclin-dependent kinase inhibitor 1A (P21)	protein coding gene	ENSMUSG00000023067
P35_CB	Cdon	current symbol	Cdon	-0.426691	5.65851	8.07e-05	0.000553421	cell adhesion molecule-related/down-regulated by oncogenes	protein coding gene	ENSMUSG00000038119
P35_CB	Cdr1	current symbol	Cdr1	-0.682163	5.0758	5.65e-08	8.8e-07	cerebellar degeneration related antigen 1	protein coding gene	ENSMUSG00000090546
P35_CB	Cds2	current symbol	Cds2	0.252236	9.36711	0.0101206	0.0325751	CDP-diacylglycerol synthase (phosphatidate cytidylyltransferase) 2	protein coding gene	ENSMUSG00000058793
P35_CB	Cdyl2	current symbol	Cdyl2	0.513952	3.46283	0.0108795	0.0345203	chromodomain protein, Y chromosome-like 2	protein coding gene	ENSMUSG00000031758
P14_HC	Cebpa	current symbol	Cebpa	-0.486962	4.39014	0.00170996	0.0416271	CCAAT/enhancer binding protein (C/EBP), alpha	protein coding gene	ENSMUSG00000034957
P35_CB	Cebpg	current symbol	Cebpg	-0.321323	5.73026	0.00194939	0.00830908	CCAAT/enhancer binding protein (C/EBP), gamma	protein coding gene	ENSMUSG00000056216
P35_CB	Cecr5	old symbol	Hdhd5	-0.373873	4.72273	0.00602209	0.0212663	haloacid dehalogenase like hydrolase domain containing 5	protein coding gene	ENSMUSG00000058979
P35_CB	Celsr2	current symbol	Celsr2	0.284423	7.3627	0.000838535	0.00409754	cadherin, EGF LAG seven-pass G-type receptor 2	protein coding gene	ENSMUSG00000068740
P14_HC	Celsr3	current symbol	Celsr3	-0.380361	6.75947	0.00031537	0.0117954	cadherin, EGF LAG seven-pass G-type receptor 3	protein coding gene	ENSMUSG00000023473
P35_CB	Celsr3	current symbol	Celsr3	-0.771725	7.50316	4.1e-19	2.96e-17	cadherin, EGF LAG seven-pass G-type receptor 3	protein coding gene	ENSMUSG00000023473
P35_CB	Cend1	current symbol	Cend1	0.471859	8.1536	1.37e-07	1.97e-06	cell cycle exit and neuronal differentiation 1	protein coding gene	ENSMUSG00000060240
P35_CB	Cenpc1	current symbol	Cenpc1	-0.393892	5.02169	0.00167441	0.0073009	centromere protein C1	protein coding gene	ENSMUSG00000029253
P35_CB	Cep110	old symbol	Cntrl	-1.24549	4.2064	4.87e-14	2.05e-12	centriolin	protein coding gene	ENSMUSG00000057110
P35_CB	Cep120	current symbol	Cep120	0.240609	6.85096	0.00574406	0.0204223	centrosomal protein 120	protein coding gene	ENSMUSG00000048799
P35_CB	Cep135	current symbol	Cep135	-0.754058	3.66728	0.000100291	0.000672032	centrosomal protein 135	protein coding gene	ENSMUSG00000036403
P35_CB	Cep164	current symbol	Cep164	-0.372551	4.82271	0.00514533	0.0186427	centrosomal protein 164	protein coding gene	ENSMUSG00000043987
P35_CB	Cep192	current symbol	Cep192	-0.661476	3.73713	0.000518351	0.00273519	centrosomal protein 192	protein coding gene	ENSMUSG00000024542
P35_CB	Cep290	current symbol	Cep290	-0.345228	4.84579	0.00799246	0.0268781	centrosomal protein 290	protein coding gene	ENSMUSG00000019971
P35_CB	Cep57	current symbol	Cep57	-0.610554	4.69928	1.22e-05	0.000106344	centrosomal protein 57	protein coding gene	ENSMUSG00000031922
P35_CB	Cep63	current symbol	Cep63	-0.555974	4.10994	0.000841943	0.00411271	centrosomal protein 63	protein coding gene	ENSMUSG00000032534
P35_CB	Cep70	current symbol	Cep70	-1.28573	3.55857	3.04e-10	7.08e-09	centrosomal protein 70	protein coding gene	ENSMUSG00000056267
P35_CB	Cercam	current symbol	Cercam	-0.581302	3.69466	0.00257513	0.0104541	cerebral endothelial cell adhesion molecule	protein coding gene	ENSMUSG00000039787
P35_CB	Cerkl	current symbol	Cerkl	-1.44013	2.54349	4.36e-07	5.54e-06	ceramide kinase-like	protein coding gene	ENSMUSG00000075256
P35_CB	Cetn3	current symbol	Cetn3	-0.575939	5.23876	1.6e-06	1.77e-05	centrin 3	protein coding gene	ENSMUSG00000021537
P35_CB	Cfh	current symbol	Cfh	-1.06117	4.68203	4.16e-14	1.79e-12	complement component factor h	protein coding gene	ENSMUSG00000026365
P35_CB	Cfl1	current symbol	Cfl1	0.398545	9.23948	4.03e-05	0.000303529	cofilin 1, non-muscle	protein coding gene	ENSMUSG00000056201
P35_CB	Cfl2	current symbol	Cfl2	-0.522977	6.519	9.44e-09	1.72e-07	cofilin 2, muscle	protein coding gene	ENSMUSG00000062929
P35_CB	Cfp	current symbol	Cfp	-1.0563	3.79326	1.39e-08	2.43e-07	complement factor properdin	protein coding gene	ENSMUSG00000001128
P35_CB	Cgn	current symbol	Cgn	-0.561748	3.22966	0.0115976	0.0362949	cingulin	protein coding gene	ENSMUSG00000068876
P35_CB	Chchd10	current symbol	Chchd10	0.396598	7.15256	3.25e-06	3.33e-05	coiled-coil-helix-coiled-coil-helix domain containing 10	protein coding gene	ENSMUSG00000049422
P35_CB	Chchd2	current symbol	Chchd2	0.230556	6.90333	0.00721588	0.024704	coiled-coil-helix-coiled-coil-helix domain containing 2	protein coding gene	ENSMUSG00000070493
P35_CB	Chchd4	current symbol	Chchd4	0.354691	4.51353	0.0139473	0.0418418	coiled-coil-helix-coiled-coil-helix domain containing 4	protein coding gene	ENSMUSG00000034203
P35_CB	Chchd5	current symbol	Chchd5	0.567643	3.67685	0.00263561	0.0106739	coiled-coil-helix-coiled-coil-helix domain containing 5	protein coding gene	ENSMUSG00000037938
P35_CB	Chd4	current symbol	Chd4	0.314654	8.10934	0.000424974	0.00231122	chromodomain helicase DNA binding protein 4	protein coding gene	ENSMUSG00000063870
P14_CB	Chd5	current symbol	Chd5	-0.394418	4.75016	0.000699434	0.035486	chromodomain helicase DNA binding protein 5	protein coding gene	ENSMUSG00000005045
P35_CB	Chd5	current symbol	Chd5	0.288458	5.35147	0.0154929	0.0456958	chromodomain helicase DNA binding protein 5	protein coding gene	ENSMUSG00000005045
P35_CB	Chd8	current symbol	Chd8	0.272541	7.05781	0.00136544	0.00615418	chromodomain helicase DNA binding protein 8	protein coding gene	ENSMUSG00000053754
P35_CB	Cherp	current symbol	Cherp	0.249994	6.08293	0.0108893	0.0345433	calcium homeostasis endoplasmic reticulum protein	protein coding gene	ENSMUSG00000052488
P35_CB	Chfr	current symbol	Chfr	-0.79427	5.68677	1.59e-13	6.2e-12	checkpoint with forkhead and ring finger domains	protein coding gene	ENSMUSG00000014668
P35_CB	Chga	current symbol	Chga	0.552576	6.96436	1.56e-10	3.86e-09	chromogranin A	protein coding gene	ENSMUSG00000021194
P35_CB	Chgb	current symbol	Chgb	0.692924	9.40967	2.36e-12	7.63e-11	chromogranin B	protein coding gene	ENSMUSG00000027350
P35_CB	Chic1	current symbol	Chic1	-0.609681	5.43188	7.32e-08	1.12e-06	cysteine-rich hydrophobic domain 1	protein coding gene	ENSMUSG00000031327
P14_HC	Chm	current symbol	Chm	0.397489	5.72571	0.00063065	0.0196649	choroidermia (RAB escort protein 1)	protein coding gene	ENSMUSG00000025531
P35_CB	Chm	current symbol	Chm	-0.409501	5.98931	4.18e-05	0.000312591	choroidermia (RAB escort protein 1)	protein coding gene	ENSMUSG00000025531
P35_CB	Chmp4b	current symbol	Chmp4b	0.270251	7.71524	0.00194753	0.0083038	charged multivesicular body protein 4B	protein coding gene	ENSMUSG00000038467
P35_CB	Chn2	current symbol	Chn2	0.510661	9.74523	2.95e-07	3.89e-06	chimerin 2	protein coding gene	ENSMUSG00000004633
P35_CB	Chpf2	current symbol	Chpf2	-0.698516	5.02544	3.21e-08	5.24e-07	chondroitin polymerizing factor 2	protein coding gene	ENSMUSG00000038181
P35_CB	Chpt1	current symbol	Chpt1	-0.738117	6.5357	5.3e-16	2.87e-14	choline phosphotransferase 1	protein coding gene	ENSMUSG00000060002
P35_CB	Chrd	current symbol	Chrd	-1.4268	5.1482	1.07e-29	1.44e-27	chordin	protein coding gene	ENSMUSG00000006958
P14_CB	Chrdl2	current symbol	Chrdl2	-1.8412	0.173839	2.93e-07	4.6e-05	chordin-like 2	protein coding gene	ENSMUSG00000030732
P14_HC	Chrm3	current symbol	Chrm3	0.4415	5.42093	0.000324579	0.0120747	cholinergic receptor, muscarinic 3, cardiac	protein coding gene	ENSMUSG00000046159
P35_HC	Chrm4	current symbol	Chrm4	1.0973	4.72445	1.88e-07	4.98e-05	cholinergic receptor, muscarinic 4	protein coding gene	ENSMUSG00000040495
P14_HC	Chrna5	current symbol	Chrna5	0.863764	2.84752	0.000244142	0.0097348	cholinergic receptor, nicotinic, alpha polypeptide 5	protein coding gene	ENSMUSG00000035594
P35_CB	Chtf8	current symbol	Chtf8	0.319715	6.39351	0.000586991	0.0030356	CTF8, chromosome transmission fidelity factor 8	protein coding gene	ENSMUSG00000046691
P35_CB	Chuk	current symbol	Chuk	-1.09471	5.32505	2.46e-20	1.92e-18	conserved helix-loop-helix ubiquitous kinase	protein coding gene	ENSMUSG00000025199
P35_CB	Ciapin1	current symbol	Ciapin1	0.333045	5.75409	0.00140227	0.0062913	cytokine induced apoptosis inhibitor 1	protein coding gene	ENSMUSG00000031781
P35_CB	Cir1	current symbol	Cir1	-0.321249	5.1383	0.00808338	0.0271006	corepressor interacting with RBPJ, 1	protein coding gene	ENSMUSG00000041777
P14_HC	Cirbp	current symbol	Cirbp	-0.355996	5.86415	0.00173182	0.0419619	cold inducible RNA binding protein	protein coding gene	ENSMUSG00000045193
P35_CB	Cirbp	current symbol	Cirbp	-0.558231	6.27821	5.97e-09	1.13e-07	cold inducible RNA binding protein	protein coding gene	ENSMUSG00000045193
P35_CB	Cirh1a	old symbol	Utp4	0.399621	4.39881	0.00872479	0.0287739	UTP4 small subunit processome component	protein coding gene	ENSMUSG00000041438
P35_CB	Cisd1	current symbol	Cisd1	0.247077	6.12128	0.0109247	0.0345929	CDGSH iron sulfur domain 1	protein coding gene	ENSMUSG00000037710
P35_CB	Cisd2	current symbol	Cisd2	-0.249003	6.05073	0.0115915	0.0362942	CDGSH iron sulfur domain 2	protein coding gene	ENSMUSG00000028165
P35_CB	Cisd3	current symbol	Cisd3	0.560363	4.28424	0.000311895	0.00176605	CDGSH iron sulfur domain 3	protein coding gene	ENSMUSG00000078695
P35_CB	Cit	current symbol	Cit	0.272618	5.62296	0.0120173	0.0372982	citron	protein coding gene	ENSMUSG00000029516
P35_CB	Cited2	current symbol	Cited2	0.391749	6.81773	7.19e-06	6.71e-05	Cbp/p300-interacting transactivator, with Glu/Asp-rich carboxy-terminal domain, 2	protein coding gene	ENSMUSG00000039910
P14_HC	Cited4	current symbol	Cited4	-1.13973	1.42394	0.000544438	0.0178034	Cbp/p300-interacting transactivator, with Glu/Asp-rich carboxy-terminal domain, 4	protein coding gene	ENSMUSG00000070803
P35_CB	Ckap5	current symbol	Ckap5	0.342919	8.3277	0.000154182	0.00096013	cytoskeleton associated protein 5	protein coding gene	ENSMUSG00000040549
P35_CB	Ckb	current symbol	Ckb	0.393775	11.1301	6.64e-05	0.000467443	creatine kinase, brain	protein coding gene	ENSMUSG00000001270
P35_CB	Ckmt1	current symbol	Ckmt1	0.552686	7.39998	1.07e-10	2.75e-09	creatine kinase, mitochondrial 1, ubiquitous	protein coding gene	ENSMUSG00000000308
P35_CB	Clasp1	current symbol	Clasp1	0.557416	6.72708	2.51e-10	5.93e-09	CLIP associating protein 1	protein coding gene	ENSMUSG00000064302
P35_CB	Clcc1	current symbol	Clcc1	-0.657508	4.92531	3.42e-07	4.42e-06	chloride channel CLIC-like 1	protein coding gene	ENSMUSG00000027884
P35_CB	Clcn1	current symbol	Clcn1	-0.867085	3.20239	0.000124645	0.000808305	chloride channel, voltage-sensitive 1	protein coding gene	ENSMUSG00000029862
P14_HC	Clcn2	current symbol	Clcn2	-0.440475	5.90455	9.54e-05	0.00459597	chloride channel, voltage-sensitive 2	protein coding gene	ENSMUSG00000022843
P35_CB	Clcn2	current symbol	Clcn2	-0.820616	5.77003	6.67e-15	3.17e-13	chloride channel, voltage-sensitive 2	protein coding gene	ENSMUSG00000022843
P35_CB	Clcn6	current symbol	Clcn6	0.386924	6.0657	7.69e-05	0.000532228	chloride channel, voltage-sensitive 6	protein coding gene	ENSMUSG00000029016
P35_CB	Cldn1	current symbol	Cldn1	-1.79092	1.16898	5.47e-05	0.000395412	claudin 1	protein coding gene	ENSMUSG00000022512
P35_HC	Cldn1	current symbol	Cldn1	1.71308	1.97892	0.000561321	0.0442738	claudin 1	protein coding gene	ENSMUSG00000022512
P35_CB	Cldn10a	old symbol	Cldn10	0.399571	4.61752	0.00411663	0.0155463	claudin 10	protein coding gene	ENSMUSG00000022132
P14_HC	Cldn11	current symbol	Cldn11	0.600489	7.39755	1.68e-08	3.03e-06	claudin 11	protein coding gene	ENSMUSG00000037625
P35_CB	Cldn2	current symbol	Cldn2	-1.1345	2.17882	0.0002885	0.00165092	claudin 2	protein coding gene	ENSMUSG00000047230
P35_HC	Cldn2	current symbol	Cldn2	3.13988	2.43409	7.73e-11	4.27e-08	claudin 2	protein coding gene	ENSMUSG00000047230
P35_CB	Cldn5	current symbol	Cldn5	-1.07678	4.30099	1.12e-11	3.36e-10	claudin 5	protein coding gene	ENSMUSG00000041378
P35_CB	Cldnd1	current symbol	Cldnd1	-0.24378	6.10306	0.0116813	0.0364891	claudin domain containing 1	protein coding gene	ENSMUSG00000022744
P35_CB	Clec14a	current symbol	Clec14a	-1.63113	2.17012	5.49e-07	6.82e-06	C-type lectin domain family 14, member a	protein coding gene	ENSMUSG00000045930
P35_CB	Clec16a	current symbol	Clec16a	0.635549	7.11383	9.44e-14	3.79e-12	C-type lectin domain family 16, member A	protein coding gene	ENSMUSG00000068663
P35_CB	Clec3b	current symbol	Clec3b	-0.959826	4.38561	7.7e-10	1.67e-08	C-type lectin domain family 3, member b	protein coding gene	ENSMUSG00000025784
P14_HC	Clgn	current symbol	Clgn	0.703207	3.13336	0.00107875	0.0293098	calmegin	protein coding gene	ENSMUSG00000002190
P35_CB	Clgn	current symbol	Clgn	-0.679853	2.75988	0.00931837	0.0304116	calmegin	protein coding gene	ENSMUSG00000002190
P14_CB	Clic1	current symbol	Clic1	0.415314	4.81065	0.000308478	0.0181923	chloride intracellular channel 1	protein coding gene	ENSMUSG00000007041
P35_CB	Clic3	current symbol	Clic3	-1.01806	1.55421	0.010892	0.0345438	chloride intracellular channel 3	protein coding gene	ENSMUSG00000015093
P35_CB	Clic4	current symbol	Clic4	-0.25785	7.62068	0.00289601	0.0115446	chloride intracellular channel 4 (mitochondrial)	protein coding gene	ENSMUSG00000037242
P35_CB	Clic5	current symbol	Clic5	-0.822206	2.42084	0.00386984	0.0147423	chloride intracellular channel 5	protein coding gene	ENSMUSG00000023959
P14_HC	Clic6	current symbol	Clic6	0.770646	3.1257	0.000339702	0.0124309	chloride intracellular channel 6	protein coding gene	ENSMUSG00000022949
P35_CB	Clic6	current symbol	Clic6	-1.20656	4.47678	4.72e-16	2.59e-14	chloride intracellular channel 6	protein coding gene	ENSMUSG00000022949
P35_HC	Clic6	current symbol	Clic6	2.1676	3.83563	9.55e-14	8.78e-11	chloride intracellular channel 6	protein coding gene	ENSMUSG00000022949
P35_CB	Clip2	current symbol	Clip2	0.356385	6.61173	7.52e-05	0.000520992	CAP-GLY domain containing linker protein 2	protein coding gene	ENSMUSG00000063146
P35_CB	Clip3	current symbol	Clip3	0.928105	9.97233	1.71e-20	1.35e-18	CAP-GLY domain containing linker protein 3	protein coding gene	ENSMUSG00000013921
P35_CB	Clk1	current symbol	Clk1	-1.66639	6.76496	2.89e-76	3.54e-73	CDC-like kinase 1	protein coding gene	ENSMUSG00000026034
P35_CB	Clk2	current symbol	Clk2	-0.432191	4.90343	0.000864399	0.00420109	CDC-like kinase 2	protein coding gene	ENSMUSG00000068917
P35_CB	Clk4	current symbol	Clk4	-1.2832	5.72296	1.14e-32	1.73e-30	CDC like kinase 4	protein coding gene	ENSMUSG00000020385
P14_HC	Clmn	current symbol	Clmn	0.352446	6.69746	0.000881813	0.0251253	calmin	protein coding gene	ENSMUSG00000021097
P35_CB	Clmn	current symbol	Clmn	-0.22445	8.14088	0.0120178	0.0372982	calmin	protein coding gene	ENSMUSG00000021097
P35_CB	Cln5	current symbol	Cln5	-0.403798	4.97225	0.00150729	0.00669123	ceroid-lipofuscinosis, neuronal 5	protein coding gene	ENSMUSG00000022125
P35_CB	Clock	current symbol	Clock	-0.283633	6.90974	0.00101991	0.00482135	circadian locomotor output cycles kaput	protein coding gene	ENSMUSG00000029238
P35_CB	Clptm1	current symbol	Clptm1	0.217135	7.08132	0.0103963	0.0333085	cleft lip and palate associated transmembrane protein 1	protein coding gene	ENSMUSG00000002981
P35_CB	Clstn1	current symbol	Clstn1	0.459193	9.33943	2.72e-06	2.86e-05	calsyntenin 1	protein coding gene	ENSMUSG00000039953
P35_CB	Clstn3	current symbol	Clstn3	0.499092	9.29675	3.12e-07	4.09e-06	calsyntenin 3	protein coding gene	ENSMUSG00000008153
P35_CB	Clta	current symbol	Clta	0.370806	7.27404	1.37e-05	0.000118193	clathrin, light polypeptide (Lca)	protein coding gene	ENSMUSG00000028478
P35_CB	Cltb	current symbol	Cltb	0.430007	7.54161	6.17e-07	7.54e-06	clathrin, light polypeptide (Lcb)	protein coding gene	ENSMUSG00000047547
P35_CB	Cltc	current symbol	Cltc	0.458103	9.39376	3.21e-06	3.3e-05	clathrin, heavy polypeptide (Hc)	protein coding gene	ENSMUSG00000047126
P35_CB	Clvs1	current symbol	Clvs1	0.274558	6.90859	0.00151925	0.00673323	clavesin 1	protein coding gene	ENSMUSG00000041216
P35_CB	Clvs2	current symbol	Clvs2	0.627634	2.9542	0.0117384	0.0365931	clavesin 2	protein coding gene	ENSMUSG00000019785
P35_CB	Cmah	current symbol	Cmah	-2.17852	1.2068	3.4e-06	3.47e-05	cytidine monophospho-N-acetylneuraminic acid hydroxylase	protein coding gene	ENSMUSG00000016756
P35_CB	Cml5	old symbol	Nat8f5	1.07587	1.63138	0.00757256	0.0256709	N-acetyltransferase 8 (GCN5-related) family member 5	protein coding gene	ENSMUSG00000079494
P14_CB	Cmya5	current symbol	Cmya5	-0.40989	4.93064	0.000252321	0.0156372	cardiomyopathy associated 5	protein coding gene	ENSMUSG00000047419
P14_HC	Cnksr2	current symbol	Cnksr2	0.361455	7.28503	0.000624622	0.0195609	connector enhancer of kinase suppressor of Ras 2	protein coding gene	ENSMUSG00000025658
P35_CB	Cnksr2	current symbol	Cnksr2	0.413033	7.32494	1.26e-06	1.43e-05	connector enhancer of kinase suppressor of Ras 2	protein coding gene	ENSMUSG00000025658
P35_CB	Cnksr3	current symbol	Cnksr3	0.306613	6.23138	0.00107949	0.00505688	Cnksr family member 3	protein coding gene	ENSMUSG00000015202
P35_CB	Cnnm1	current symbol	Cnnm1	0.219195	7.72541	0.0120472	0.0373725	cyclin M1	protein coding gene	ENSMUSG00000025189
P35_CB	Cnnm3	current symbol	Cnnm3	-0.287536	5.68538	0.00720887	0.0246926	cyclin M3	protein coding gene	ENSMUSG00000001138
P35_CB	Cnot1	current symbol	Cnot1	0.327586	7.56797	0.000148629	0.000933745	CCR4-NOT transcription complex, subunit 1	protein coding gene	ENSMUSG00000036550
P35_CB	Cnot10	current symbol	Cnot10	-0.353097	5.59462	0.00114727	0.00529889	CCR4-NOT transcription complex, subunit 10	protein coding gene	ENSMUSG00000056167
P35_CB	Cnot3	current symbol	Cnot3	0.277431	5.90607	0.00592205	0.0209557	CCR4-NOT transcription complex, subunit 3	protein coding gene	ENSMUSG00000035632
P35_CB	Cnot7	current symbol	Cnot7	-0.300324	6.18091	0.00180783	0.00779443	CCR4-NOT transcription complex, subunit 7	protein coding gene	ENSMUSG00000031601
P35_CB	Cnot8	current symbol	Cnot8	0.472779	6.02333	1.44e-06	1.61e-05	CCR4-NOT transcription complex, subunit 8	protein coding gene	ENSMUSG00000020515
P14_HC	Cnp	current symbol	Cnp	0.475324	8.92821	4.07e-05	0.00238434	2',3'-cyclic nucleotide 3' phosphodiesterase	protein coding gene	ENSMUSG00000006782
P35_CB	Cnpy1	current symbol	Cnpy1	-1.47095	5.89478	2.19e-44	5.58e-42	canopy FGF signaling regulator 1	protein coding gene	ENSMUSG00000044681
P35_CB	Cnr1	current symbol	Cnr1	-0.301279	8.99192	0.00154429	0.00682402	cannabinoid receptor 1 (brain)	protein coding gene	ENSMUSG00000044288
P35_CB	Cntfr	current symbol	Cntfr	0.353008	6.8246	5.13e-05	0.000373517	ciliary neurotrophic factor receptor	protein coding gene	ENSMUSG00000028444
P35_CB	Cntln	current symbol	Cntln	-0.719978	4.24464	5.28e-06	5.11e-05	centlein, centrosomal protein	protein coding gene	ENSMUSG00000038070
P14_CB	Cntn4	current symbol	Cntn4	-0.433215	5.54856	1.49e-05	0.00149657	contactin 4	protein coding gene	ENSMUSG00000064293
P35_CB	Cntn4	current symbol	Cntn4	-0.462249	5.45863	5.18e-05	0.000376783	contactin 4	protein coding gene	ENSMUSG00000064293
P35_CB	Cntnap2	current symbol	Cntnap2	0.689691	5.67197	1.28e-10	3.25e-09	contactin associated protein-like 2	protein coding gene	ENSMUSG00000039419
P35_CB	Cntnap4	current symbol	Cntnap4	0.246313	5.95167	0.013852	0.0415951	contactin associated protein-like 4	protein coding gene	ENSMUSG00000031772
P35_HC	Cntnap5c	current symbol	Cntnap5c	-1.07008	3.82799	0.00013371	0.0148838	contactin associated protein-like 5C	protein coding gene	ENSMUSG00000038048
P35_HC	Cobl	current symbol	Cobl	0.80454	4.31891	0.000579915	0.0452235	cordon-bleu WH2 repeat	protein coding gene	ENSMUSG00000020173
P35_CB	Cobra1	old symbol	Nelfb	0.241964	6.11707	0.0134925	0.0407585	negative elongation factor complex member B	protein coding gene	ENSMUSG00000013465
P35_CB	Cog4	current symbol	Cog4	0.316023	6.04044	0.00127669	0.00580714	component of oligomeric golgi complex 4	protein coding gene	ENSMUSG00000031753
P14_HC	Cog5	current symbol	Cog5	0.571737	5.30083	5.38e-06	0.000447135	component of oligomeric golgi complex 5	protein coding gene	ENSMUSG00000035933
P35_CB	Cog5	current symbol	Cog5	-0.408099	5.24862	0.000559812	0.00291385	component of oligomeric golgi complex 5	protein coding gene	ENSMUSG00000035933
P35_CB	Cog7	current symbol	Cog7	0.388005	5.74723	0.000202788	0.00121781	component of oligomeric golgi complex 7	protein coding gene	ENSMUSG00000034951
P14_HC	Col11a1	current symbol	Col11a1	0.765573	4.73912	7.64e-08	1.18e-05	collagen, type XI, alpha 1	protein coding gene	ENSMUSG00000027966
P35_HC	Col11a1	current symbol	Col11a1	1.16708	4.62201	7.51e-08	2.25e-05	collagen, type XI, alpha 1	protein coding gene	ENSMUSG00000027966
P35_CB	Col11a2	current symbol	Col11a2	-1.00463	4.13001	1.73e-09	3.58e-08	collagen, type XI, alpha 2	protein coding gene	ENSMUSG00000024330
P35_CB	Col12a1	current symbol	Col12a1	-0.973536	3.79765	1.81e-07	2.49e-06	collagen, type XII, alpha 1	protein coding gene	ENSMUSG00000032332
P14_HC	Col15a1	current symbol	Col15a1	-0.717455	3.90229	4.14e-05	0.00241413	collagen, type XV, alpha 1	protein coding gene	ENSMUSG00000028339
P35_CB	Col15a1	current symbol	Col15a1	-0.848415	2.4412	0.00354823	0.0137227	collagen, type XV, alpha 1	protein coding gene	ENSMUSG00000028339
P35_CB	Col16a1	current symbol	Col16a1	-0.939255	3.27189	2.83e-05	0.00022221	collagen, type XVI, alpha 1	protein coding gene	ENSMUSG00000040690
P35_CB	Col19a1	current symbol	Col19a1	-0.696105	4.83013	1.7e-07	2.37e-06	collagen, type XIX, alpha 1	protein coding gene	ENSMUSG00000026141
P35_CB	Col1a2	current symbol	Col1a2	-0.277236	5.51142	0.0126541	0.0387733	collagen, type I, alpha 2	protein coding gene	ENSMUSG00000029661
P35_CB	Col20a1	current symbol	Col20a1	-1.06931	2.30622	0.00046968	0.00250781	collagen, type XX, alpha 1	protein coding gene	ENSMUSG00000016356
P35_HC	Col25a1	current symbol	Col25a1	-0.99398	4.63528	7.71e-06	0.00147744	collagen, type XXV, alpha 1	protein coding gene	ENSMUSG00000058897
P35_CB	Col27a1	current symbol	Col27a1	-1.93822	4.58716	1.25e-36	2.31e-34	collagen, type XXVII, alpha 1	protein coding gene	ENSMUSG00000045672
P14_CB	Col2a1	current symbol	Col2a1	0.614563	3.85318	1.61e-05	0.00161278	collagen, type II, alpha 1	protein coding gene	ENSMUSG00000022483
P35_CB	Col3a1	current symbol	Col3a1	-1.04175	3.8543	1.79e-08	3.08e-07	collagen, type III, alpha 1	protein coding gene	ENSMUSG00000026043
P35_CB	Col4a1	current symbol	Col4a1	-0.718238	4.71744	1.72e-07	2.38e-06	collagen, type IV, alpha 1	protein coding gene	ENSMUSG00000031502
P35_CB	Col4a2	current symbol	Col4a2	-0.513892	4.43067	0.000554572	0.00289124	collagen, type IV, alpha 2	protein coding gene	ENSMUSG00000031503
P35_CB	Col4a3bp	current symbol	Col4a3bp	-0.235347	6.66655	0.00880846	0.0289931	collagen, type IV, alpha 3 (Goodpasture antigen) binding protein	protein coding gene	ENSMUSG00000021669
P35_CB	Col4a5	current symbol	Col4a5	-0.486595	3.54226	0.015133	0.0448438	collagen, type IV, alpha 5	protein coding gene	ENSMUSG00000031274
P35_CB	Col5a1	current symbol	Col5a1	-2.11155	4.10737	8.21e-32	1.18e-29	collagen, type V, alpha 1	protein coding gene	ENSMUSG00000026837
P35_HC	Col5a1	current symbol	Col5a1	1.41288	3.85404	2.64e-07	6.75e-05	collagen, type V, alpha 1	protein coding gene	ENSMUSG00000026837
P14_HC	Col5a2	current symbol	Col5a2	-0.551153	4.17951	0.0007622	0.0225507	collagen, type V, alpha 2	protein coding gene	ENSMUSG00000026042
P35_CB	Col5a2	current symbol	Col5a2	-0.736648	2.82145	0.00509616	0.0185143	collagen, type V, alpha 2	protein coding gene	ENSMUSG00000026042
P35_CB	Col5a3	current symbol	Col5a3	-1.23033	2.57993	1.26e-05	0.000109403	collagen, type V, alpha 3	protein coding gene	ENSMUSG00000004098
P35_CB	Col6a1	current symbol	Col6a1	-1.13193	3.75237	2.97e-09	5.92e-08	collagen, type VI, alpha 1	protein coding gene	ENSMUSG00000001119
P35_HC	Col6a1	current symbol	Col6a1	0.92349	5.06501	1.52e-06	0.000338216	collagen, type VI, alpha 1	protein coding gene	ENSMUSG00000001119
P35_HC	Col6a3	current symbol	Col6a3	-1.1925	3.21934	0.000366157	0.0317866	collagen, type VI, alpha 3	protein coding gene	ENSMUSG00000048126
P35_CB	Col7a1	current symbol	Col7a1	-3.1983	2.66385	1.71e-23	1.59e-21	collagen, type VII, alpha 1	protein coding gene	ENSMUSG00000025650
P14_HC	Col8a1	current symbol	Col8a1	0.979639	2.55313	9.59e-05	0.00460504	collagen, type VIII, alpha 1	protein coding gene	ENSMUSG00000068196
P35_CB	Col8a1	current symbol	Col8a1	-1.79427	2.44271	2.85e-09	5.7e-08	collagen, type VIII, alpha 1	protein coding gene	ENSMUSG00000068196
P35_HC	Col8a1	current symbol	Col8a1	2.60398	2.3174	4.32e-08	1.39e-05	collagen, type VIII, alpha 1	protein coding gene	ENSMUSG00000068196
P35_CB	Col8a2	current symbol	Col8a2	-0.85632	2.91868	0.000428926	0.00232801	collagen, type VIII, alpha 2	protein coding gene	ENSMUSG00000056174
P35_CB	Col9a1	current symbol	Col9a1	-1.36187	1.38495	0.00130875	0.00591903	collagen, type IX, alpha 1	protein coding gene	ENSMUSG00000026147
P35_CB	Col9a3	current symbol	Col9a3	-0.243117	5.9849	0.0128002	0.039132	collagen, type IX, alpha 3	protein coding gene	ENSMUSG00000027570
P35_CB	Colec12	current symbol	Colec12	-0.93762	4.53898	1.43e-10	3.6e-09	collectin sub-family member 12	protein coding gene	ENSMUSG00000036103
P35_CB	Commd3	current symbol	Commd3	-0.483715	5.34199	3.09e-05	0.000240114	COMM domain containing 3	protein coding gene	ENSMUSG00000051154
P35_CB	Commd4	current symbol	Commd4	-0.402298	4.84799	0.00229876	0.00952425	COMM domain containing 4	protein coding gene	ENSMUSG00000032299
P35_CB	Commd8	current symbol	Commd8	-0.345841	5.09889	0.00507608	0.0184612	COMM domain containing 8	protein coding gene	ENSMUSG00000029213
P35_CB	Commd9	current symbol	Commd9	0.352044	4.6059	0.012204	0.0377285	COMM domain containing 9	protein coding gene	ENSMUSG00000027163
P35_CB	Copa	current symbol	Copa	0.26186	7.96884	0.00329711	0.0128771	coatomer protein complex subunit alpha	protein coding gene	ENSMUSG00000026553
P35_CB	Copb2	current symbol	Copb2	0.289936	6.76141	0.0010411	0.00490604	coatomer protein complex, subunit beta 2 (beta prime)	protein coding gene	ENSMUSG00000032458
P35_CB	Copg	old symbol	Copg1	0.475449	8.04503	9.52e-08	1.42e-06	coatomer protein complex, subunit gamma 1	protein coding gene	ENSMUSG00000030058
P35_CB	Cops2	current symbol	Cops2	-0.506366	6.76414	8.59e-09	1.57e-07	COP9 signalosome subunit 2	protein coding gene	ENSMUSG00000027206
P35_CB	Cops4	current symbol	Cops4	0.269339	6.09987	0.00624516	0.0219264	COP9 signalosome subunit 4	protein coding gene	ENSMUSG00000035297
P35_CB	Cops6	current symbol	Cops6	0.232027	6.20276	0.0153947	0.0454559	COP9 signalosome subunit 6	protein coding gene	ENSMUSG00000019494
P35_CB	Cops7a	current symbol	Cops7a	0.380289	6.71806	1.65e-05	0.000139712	COP9 signalosome subunit 7A	protein coding gene	ENSMUSG00000030127
P35_CB	Cops8	current symbol	Cops8	0.341201	6.2293	0.000359908	0.00199765	COP9 signalosome subunit 8	protein coding gene	ENSMUSG00000034432
P35_CB	Coq10a	current symbol	Coq10a	-0.302965	5.07828	0.0152491	0.045085	coenzyme Q10A	protein coding gene	ENSMUSG00000039914
P35_CB	Coq3	current symbol	Coq3	-0.395453	4.22965	0.0118173	0.0367862	coenzyme Q3 methyltransferase	protein coding gene	ENSMUSG00000028247
P35_CB	Coq5	current symbol	Coq5	0.453421	5.51527	4.25e-05	0.000317326	coenzyme Q5 methyltransferase	protein coding gene	ENSMUSG00000041733
P14_HC	Coq7	current symbol	Coq7	-0.527242	4.08409	0.0015992	0.0393447	demethyl-Q 7	protein coding gene	ENSMUSG00000030652
P35_CB	Corin	current symbol	Corin	0.45997	3.7096	0.0124999	0.0384055	corin, serine peptidase	protein coding gene	ENSMUSG00000005220
P35_CB	Coro1a	current symbol	Coro1a	0.314505	5.86728	0.00207789	0.00877635	coronin, actin binding protein 1A	protein coding gene	ENSMUSG00000030707
P35_CB	Coro1c	current symbol	Coro1c	0.439444	6.74285	6.72e-07	8.13e-06	coronin, actin binding protein 1C	protein coding gene	ENSMUSG00000004530
P35_CB	Coro2a	current symbol	Coro2a	0.447281	5.481	6.16e-05	0.000438764	coronin, actin binding protein 2A	protein coding gene	ENSMUSG00000028337
P35_CB	Coro2b	current symbol	Coro2b	0.597809	8.58201	9.21e-11	2.4e-09	coronin, actin binding protein, 2B	protein coding gene	ENSMUSG00000041729
P14_HC	Coro6	current symbol	Coro6	-0.838347	3.62465	9.09e-06	0.000693048	coronin 6	protein coding gene	ENSMUSG00000020836
P35_CB	Coro6	current symbol	Coro6	-1.42148	3.84146	3.82e-14	1.65e-12	coronin 6	protein coding gene	ENSMUSG00000020836
P14_HC	Cort	current symbol	Cort	0.64756	3.38815	0.00129308	0.0336637	cortistatin	protein coding gene	ENSMUSG00000028971
P35_CB	Cox10	current symbol	Cox10	0.499334	4.59708	0.000428611	0.00232724	heme A:farnesyltransferase cytochrome c oxidase assembly factor 10	protein coding gene	ENSMUSG00000042148
P35_CB	Cox11	current symbol	Cox11	-0.396087	4.83838	0.00266556	0.0107635	cytochrome c oxidase assembly protein 11, copper chaperone	protein coding gene	ENSMUSG00000020544
P35_CB	Cox15	current symbol	Cox15	0.349381	5.23886	0.0034751	0.0134746	cytochrome c oxidase assembly protein 15	protein coding gene	ENSMUSG00000040018
P35_CB	Cox18	current symbol	Cox18	-0.700315	3.53436	0.000621746	0.00318359	cytochrome c oxidase assembly protein 18	protein coding gene	ENSMUSG00000035505
P35_CB	Cox4i1	current symbol	Cox4i1	0.367401	8.7928	8.67e-05	0.000589966	cytochrome c oxidase subunit 4I1	protein coding gene	ENSMUSG00000031818
P35_CB	Cox5a	current symbol	Cox5a	0.278639	7.40866	0.00110374	0.00514187	cytochrome c oxidase subunit 5A	protein coding gene	ENSMUSG00000000088
P35_CB	Cox5b	current symbol	Cox5b	0.403637	7.49554	2.42e-06	2.57e-05	cytochrome c oxidase subunit 5B	protein coding gene	ENSMUSG00000061518
P35_CB	Cox6a1	current symbol	Cox6a1	0.317993	8.14371	0.00035297	0.00196642	cytochrome c oxidase subunit 6A1	protein coding gene	ENSMUSG00000041697
P35_CB	Cox6b1	current symbol	Cox6b1	0.372012	7.18161	1.15e-05	0.000100893	cytochrome c oxidase, subunit 6B1	protein coding gene	ENSMUSG00000036751
P35_CB	Cox7a2	current symbol	Cox7a2	0.327113	7.03039	0.000113319	0.000748169	cytochrome c oxidase subunit 7A2	protein coding gene	ENSMUSG00000032330
P35_CB	Cox8a	current symbol	Cox8a	0.387715	8.46979	2.09e-05	0.000170466	cytochrome c oxidase subunit 8A	protein coding gene	ENSMUSG00000035885
P35_CB	Cp	current symbol	Cp	-0.951021	3.86502	1.62e-07	2.26e-06	ceruloplasmin	protein coding gene	ENSMUSG00000003617
P35_CB	Cpd	current symbol	Cpd	-0.24933	6.50082	0.00560752	0.0200532	carboxypeptidase D	protein coding gene	ENSMUSG00000020841
P35_CB	Cpeb3	current symbol	Cpeb3	0.499557	6.41187	4.95e-08	7.85e-07	cytoplasmic polyadenylation element binding protein 3	protein coding gene	ENSMUSG00000039652
P35_CB	Cpeb4	current symbol	Cpeb4	-0.264718	6.19579	0.00631221	0.0221272	cytoplasmic polyadenylation element binding protein 4	protein coding gene	ENSMUSG00000020300
P35_CB	Cplx1	current symbol	Cplx1	0.35031	9.30939	0.000327119	0.00184143	complexin 1	protein coding gene	ENSMUSG00000033615
P35_CB	Cplx2	current symbol	Cplx2	0.540489	10.3328	5.1e-08	8.03e-07	complexin 2	protein coding gene	ENSMUSG00000025867
P14_HC	Cplx3	current symbol	Cplx3	1.06721	3.84235	3.98e-09	8.63e-07	complexin 3	protein coding gene	ENSMUSG00000039714
P35_HC	Cplx3	current symbol	Cplx3	1.79023	3.32864	4.76e-08	1.49e-05	complexin 3	protein coding gene	ENSMUSG00000039714
P35_CB	Cpne3	current symbol	Cpne3	-0.417188	4.83994	0.00136099	0.00613882	copine III	protein coding gene	ENSMUSG00000028228
P35_CB	Cpne4	current symbol	Cpne4	1.37197	2.19505	2.14e-05	0.000174108	copine IV	protein coding gene	ENSMUSG00000032564
P35_CB	Cpne6	current symbol	Cpne6	1.09514	2.794	2.94e-05	0.000229264	copine VI	protein coding gene	ENSMUSG00000022212
P14_HC	Cpne7	current symbol	Cpne7	-0.346209	7.54196	0.00123766	0.0324646	copine VII	protein coding gene	ENSMUSG00000034796
P35_CB	Cpne8	current symbol	Cpne8	-0.827871	5.86136	9.28e-16	4.91e-14	copine VIII	protein coding gene	ENSMUSG00000052560
P35_CB	Cpne9	current symbol	Cpne9	0.320676	6.05899	0.00109447	0.00511259	copine family member IX	protein coding gene	ENSMUSG00000030270
P35_CB	Cpsf1	current symbol	Cpsf1	-0.446909	5.86612	1.12e-05	9.82e-05	cleavage and polyadenylation specific factor 1	protein coding gene	ENSMUSG00000034022
P35_CB	Cpsf4	current symbol	Cpsf4	-0.477074	4.44122	0.00151044	0.006703	cleavage and polyadenylation specific factor 4	protein coding gene	ENSMUSG00000029625
P35_CB	Cpsf6	current symbol	Cpsf6	-1.01452	7.18676	3.31e-32	4.9e-30	cleavage and polyadenylation specific factor 6	protein coding gene	ENSMUSG00000055531
P35_CB	Cpsf7	current symbol	Cpsf7	-0.341894	6.65277	0.000130996	0.000842998	cleavage and polyadenylation specific factor 7	protein coding gene	ENSMUSG00000034820
P35_CB	Cpt1c	current symbol	Cpt1c	-0.629831	5.95957	3.68e-10	8.39e-09	carnitine palmitoyltransferase 1c	protein coding gene	ENSMUSG00000007783
P35_CB	Crb2	current symbol	Crb2	-1.06978	1.19565	0.0171088	0.0497006	crumbs family member 2	protein coding gene	ENSMUSG00000035403
P35_CB	Crbn	current symbol	Crbn	-0.370679	7.19675	1.39e-05	0.000119628	cereblon	protein coding gene	ENSMUSG00000005362
P35_CB	Crebbp	current symbol	Crebbp	0.300427	6.09115	0.00246533	0.0100873	CREB binding protein	protein coding gene	ENSMUSG00000022521
P35_CB	Crebzf	current symbol	Crebzf	-1.50739	6.73175	1.01e-62	5.95e-60	CREB/ATF bZIP transcription factor	protein coding gene	ENSMUSG00000051451
P35_CB	Creg2	current symbol	Creg2	0.607293	3.16615	0.00761013	0.0257788	cellular repressor of E1A-stimulated genes 2	protein coding gene	ENSMUSG00000050967
P14_HC	Crhbp	current symbol	Crhbp	0.758779	4.77702	7.1e-08	1.11e-05	corticotropin releasing hormone binding protein	protein coding gene	ENSMUSG00000021680
P35_CB	Crispld1	current symbol	Crispld1	-1.10325	1.31052	0.0118916	0.0369748	cysteine-rich secretory protein LCCL domain containing 1	protein coding gene	ENSMUSG00000025776
P35_CB	Crkl	current symbol	Crkl	0.369606	6.44893	6.18e-05	0.000440475	v-crk avian sarcoma virus CT10 oncogene homolog-like	protein coding gene	ENSMUSG00000006134
P14_HC	Crlf1	current symbol	Crlf1	-0.571487	4.27322	0.000340424	0.0124309	cytokine receptor-like factor 1	protein coding gene	ENSMUSG00000007888
P35_CB	Crlf2	current symbol	Crlf2	-1.12656	2.90231	7.29e-06	6.78e-05	cytokine receptor-like factor 2	protein coding gene	ENSMUSG00000033467
P35_CB	Crmp1	current symbol	Crmp1	0.522155	7.87296	3.09e-09	6.13e-08	collapsin response mediator protein 1	protein coding gene	ENSMUSG00000029121
P14_HC	Crocc	current symbol	Crocc	-0.502015	5.86241	1.02e-05	0.000749263	ciliary rootlet coiled-coil, rootletin	protein coding gene	ENSMUSG00000040860
P35_CB	Crocc	current symbol	Crocc	-0.66255	4.60484	2.77e-06	2.9e-05	ciliary rootlet coiled-coil, rootletin	protein coding gene	ENSMUSG00000040860
P14_HC	Crtac1	current symbol	Crtac1	-0.383896	6.47598	0.000344751	0.0125558	cartilage acidic protein 1	protein coding gene	ENSMUSG00000042401
P35_CB	Crtac1	current symbol	Crtac1	0.78604	2.49324	0.00689062	0.0237653	cartilage acidic protein 1	protein coding gene	ENSMUSG00000042401
P35_CB	Crtam	current symbol	Crtam	0.388932	6.06251	6.98e-05	0.000488797	cytotoxic and regulatory T cell molecule	protein coding gene	ENSMUSG00000032021
P35_CB	Crtc2	current symbol	Crtc2	-0.426264	5.65233	7.22e-05	0.000503012	CREB regulated transcription coactivator 2	protein coding gene	ENSMUSG00000027936
P35_CB	Cry1	current symbol	Cry1	0.48615	5.72976	5.03e-06	4.88e-05	cryptochrome 1 (photolyase-like)	protein coding gene	ENSMUSG00000020038
P35_CB	Cry2	current symbol	Cry2	0.290032	7.20965	0.000662484	0.00336407	cryptochrome 2 (photolyase-like)	protein coding gene	ENSMUSG00000068742
P14_HC	Cryab	current symbol	Cryab	0.617413	5.42035	4.99e-07	5.97e-05	crystallin, alpha B	protein coding gene	ENSMUSG00000032060
P35_CB	Cryab	current symbol	Cryab	0.238364	6.28935	0.0118407	0.0368387	crystallin, alpha B	protein coding gene	ENSMUSG00000032060
P35_CB	Crym	current symbol	Crym	0.81534	3.08822	0.000556542	0.00289927	crystallin, mu	protein coding gene	ENSMUSG00000030905
P35_CB	Cs	current symbol	Cs	0.374175	8.17387	3.05e-05	0.000237404	citrate synthase	protein coding gene	ENSMUSG00000005683
P35_CB	Csdc2	current symbol	Csdc2	0.286465	8.34152	0.00156214	0.00687976	cold shock domain containing C2, RNA binding	protein coding gene	ENSMUSG00000042109
P35_CB	Csde1	current symbol	Csde1	-0.214121	7.91334	0.0151349	0.0448438	cold shock domain containing E1, RNA binding	protein coding gene	ENSMUSG00000068823
P35_CB	Csf1	current symbol	Csf1	-0.35425	4.70855	0.010092	0.0325192	colony stimulating factor 1 (macrophage)	protein coding gene	ENSMUSG00000014599
P35_CB	Csf2ra	current symbol	Csf2ra	-1.6286	3.33319	6.02e-13	2.15e-11	colony stimulating factor 2 receptor, alpha, low-affinity (granulocyte-macrophage)	protein coding gene	ENSMUSG00000059326
P35_CB	Csgalnact2	current symbol	Csgalnact2	-0.496563	4.55805	0.000536368	0.0028106	chondroitin sulfate N-acetylgalactosaminyltransferase 2	protein coding gene	ENSMUSG00000042042
P35_CB	Csk	current symbol	Csk	0.431201	5.04832	0.00054416	0.00284355	c-src tyrosine kinase	protein coding gene	ENSMUSG00000032312
P35_CB	Csnk1d	current symbol	Csnk1d	0.328067	7.29913	0.000123918	0.000804361	casein kinase 1, delta	protein coding gene	ENSMUSG00000025162
P35_CB	Csnk2b	current symbol	Csnk2b	0.406535	6.26083	1.84e-05	0.000152546	casein kinase 2, beta polypeptide	protein coding gene	ENSMUSG00000024387
P35_CB	Cspp1	current symbol	Cspp1	-1.13335	4.43048	6.95e-14	2.86e-12	centrosome and spindle pole associated protein 1	protein coding gene	ENSMUSG00000056763
P14_CB	Csrp1	current symbol	Csrp1	-0.382879	6.49165	2.66e-05	0.0024034	cysteine and glycine-rich protein 1	protein coding gene	ENSMUSG00000026421
P35_CB	Cstf2	current symbol	Cstf2	-0.594618	6.83057	1.07e-11	3.2e-10	cleavage stimulation factor, 3' pre-RNA subunit 2	protein coding gene	ENSMUSG00000031256
P14_HC	Cstf2t	current symbol	Cstf2t	-0.472494	6.30655	1.28e-05	0.000904854	cleavage stimulation factor, 3' pre-RNA subunit 2, tau	protein coding gene	ENSMUSG00000053536
P35_HC	Cstf2t	current symbol	Cstf2t	-0.772578	6.37228	5.15e-07	0.000124737	cleavage stimulation factor, 3' pre-RNA subunit 2, tau	protein coding gene	ENSMUSG00000053536
P35_CB	Cstf3	current symbol	Cstf3	-0.474308	5.21725	7.86e-05	0.000542329	cleavage stimulation factor, 3' pre-RNA, subunit 3	protein coding gene	ENSMUSG00000027176
P35_CB	Ctage5	old symbol	Mia2	-0.242295	5.8838	0.0169043	0.0492125	MIA SH3 domain ER export factor 2	protein coding gene	ENSMUSG00000021000
P35_CB	Ctbp2	current symbol	Ctbp2	-0.275154	6.61574	0.00217715	0.00911564	C-terminal binding protein 2	protein coding gene	ENSMUSG00000030970
P14_CB	Ctgf	old symbol	Ccn2	-0.824806	3.22321	9.15e-07	0.000132881	cellular communication network factor 2	protein coding gene	ENSMUSG00000019997
P35_CB	Ctla2a	current symbol	Ctla2a	-1.15414	2.39315	0.000105377	0.000702619	cytotoxic T lymphocyte-associated protein 2 alpha	protein coding gene	ENSMUSG00000044258
P35_CB	Ctnna2	current symbol	Ctnna2	0.312606	6.28047	0.00100568	0.00476408	catenin (cadherin associated protein), alpha 2	protein coding gene	ENSMUSG00000063063
P35_CB	Ctnna3	current symbol	Ctnna3	-0.842824	2.9116	0.000684799	0.00345397	catenin (cadherin associated protein), alpha 3	protein coding gene	ENSMUSG00000060843
P35_CB	Ctnnal1	current symbol	Ctnnal1	-0.711465	4.8888	5.24e-08	8.23e-07	catenin (cadherin associated protein), alpha-like 1	protein coding gene	ENSMUSG00000038816
P35_CB	Ctnnbl1	current symbol	Ctnnbl1	0.437489	4.72533	0.00163783	0.00716923	catenin, beta like 1	protein coding gene	ENSMUSG00000027649
P35_CB	Ctnnd1	current symbol	Ctnnd1	0.33942	6.54742	0.000193695	0.0011705	catenin (cadherin associated protein), delta 1	protein coding gene	ENSMUSG00000034101
P35_CB	Ctns	current symbol	Ctns	-0.504583	4.62815	0.000325173	0.00183277	cystinosis, nephropathic	protein coding gene	ENSMUSG00000005949
P35_CB	Ctps2	current symbol	Ctps2	-0.31395	5.70133	0.00310743	0.0122358	cytidine 5'-triphosphate synthase 2	protein coding gene	ENSMUSG00000031360
P35_CB	Ctr9	current symbol	Ctr9	0.510413	6.24475	8.04e-08	1.22e-06	CTR9 homolog, Paf1/RNA polymerase II complex component	protein coding gene	ENSMUSG00000005609
P35_CB	Ctsb	current symbol	Ctsb	0.250197	9.23354	0.00991609	0.03206	cathepsin B	protein coding gene	ENSMUSG00000021939
P35_CB	Ctsh	current symbol	Ctsh	-0.708108	2.7304	0.00743074	0.0252919	cathepsin H	protein coding gene	ENSMUSG00000032359
P35_CB	Ctsk	current symbol	Ctsk	-0.874365	1.78803	0.0154099	0.0454894	cathepsin K	protein coding gene	ENSMUSG00000028111
P35_CB	Ctso	current symbol	Ctso	-0.450182	5.29135	0.00011841	0.000775331	cathepsin O	protein coding gene	ENSMUSG00000028015
P35_CB	Ctu2	current symbol	Ctu2	-0.549335	4.08437	0.00123632	0.00564637	cytosolic thiouridylase subunit 2	protein coding gene	ENSMUSG00000049482
P35_CB	Ctxn1	current symbol	Ctxn1	0.9226	2.36636	0.00212128	0.00892327	cortexin 1	protein coding gene	ENSMUSG00000048644
P35_CB	Cuedc2	current symbol	Cuedc2	0.267544	7.00242	0.0017685	0.0076483	CUE domain containing 2	protein coding gene	ENSMUSG00000036748
P35_CB	Cugbp2	old symbol	Celf2	0.270924	7.91665	0.002108	0.00888405	CUGBP, Elav-like family member 2	protein coding gene	ENSMUSG00000002107
P35_CB	Cul5	current symbol	Cul5	-0.252609	6.33443	0.00664046	0.0230383	cullin 5	protein coding gene	ENSMUSG00000032030
P35_CB	Cul7	current symbol	Cul7	0.289979	5.75216	0.00508083	0.0184685	cullin 7	protein coding gene	ENSMUSG00000038545
P35_CB	Cux1	current symbol	Cux1	0.212239	6.85118	0.0151289	0.0448438	cut-like homeobox 1	protein coding gene	ENSMUSG00000029705
P35_CB	Cwc22	current symbol	Cwc22	-0.368486	4.73302	0.00656314	0.0228279	CWC22 spliceosome-associated protein	protein coding gene	ENSMUSG00000027014
P35_CB	Cwf19l1	current symbol	Cwf19l1	0.473472	4.161	0.00369161	0.0141715	CWF19-like 1, cell cycle control (S. pombe)	protein coding gene	ENSMUSG00000025200
P35_CB	Cwf19l2	current symbol	Cwf19l2	-0.460079	4.41962	0.00206028	0.00871287	CWF19-like 2, cell cycle control (S. pombe)	protein coding gene	ENSMUSG00000025898
P35_CB	Cx3cl1	current symbol	Cx3cl1	0.259478	5.96318	0.0098258	0.0318211	chemokine (C-X3-C motif) ligand 1	protein coding gene	ENSMUSG00000031778
P35_CB	Cxadr	current symbol	Cxadr	-0.779956	4.55867	7.5e-08	1.14e-06	coxsackie virus and adenovirus receptor	protein coding gene	ENSMUSG00000022865
P35_CB	Cxcl12	current symbol	Cxcl12	-0.797754	5.5616	4.95e-13	1.81e-11	chemokine (C-X-C motif) ligand 12	protein coding gene	ENSMUSG00000061353
P14_HC	Cxcl14	current symbol	Cxcl14	-0.372497	6.48204	0.00050709	0.0168738	chemokine (C-X-C motif) ligand 14	protein coding gene	ENSMUSG00000021508
P35_CB	Cxcr7	old symbol	Ackr3	-0.63169	2.82803	0.0131292	0.0399021	atypical chemokine receptor 3	protein coding gene	ENSMUSG00000044337
P35_CB	Cxx1a	old symbol	Rtl8a	0.388165	4.83733	0.00368147	0.0141416	retrotransposon Gag like 8A	protein coding gene	ENSMUSG00000067925
P35_CB	Cxx1b	old symbol	Rtl8b	0.478304	5.21767	6.38e-05	0.000452219	retrotransposon Gag like 8B	protein coding gene	ENSMUSG00000067924
P35_CB	Cxx1c	old symbol	Rtl8c	0.507872	5.83017	7.21e-07	8.65e-06	retrotransposon Gag like 8C	protein coding gene	ENSMUSG00000051851
P35_CB	Cxxc1	current symbol	Cxxc1	-0.483342	5.85257	2.59e-06	2.73e-05	CXXC finger 1 (PHD domain)	protein coding gene	ENSMUSG00000024560
P35_CB	Cxxc5	current symbol	Cxxc5	0.451816	7.24112	1.08e-07	1.59e-06	CXXC finger 5	protein coding gene	ENSMUSG00000046668
P35_CB	Cyb561	current symbol	Cyb561	-0.47739	4.10532	0.00304832	0.012045	cytochrome b-561	protein coding gene	ENSMUSG00000019590
P35_CB	Cyb5r1	current symbol	Cyb5r1	0.520527	4.38762	0.000496016	0.00263694	cytochrome b5 reductase 1	protein coding gene	ENSMUSG00000026456
P35_CB	Cyb5r3	current symbol	Cyb5r3	0.411722	6.06804	3.01e-05	0.000234688	cytochrome b5 reductase 3	protein coding gene	ENSMUSG00000018042
P35_CB	Cyfip2	current symbol	Cyfip2	0.476917	9.50192	1.54e-06	1.71e-05	cytoplasmic FMR1 interacting protein 2	protein coding gene	ENSMUSG00000020340
P14_HC	Cygb	current symbol	Cygb	-0.610587	5.8417	8.99e-08	1.36e-05	cytoglobin	protein coding gene	ENSMUSG00000020810
P14_HC	Cyp26b1	current symbol	Cyp26b1	0.521943	4.71507	0.000269506	0.010446	cytochrome P450, family 26, subfamily b, polypeptide 1	protein coding gene	ENSMUSG00000063415
P14_HC	Cyp2d22	current symbol	Cyp2d22	-0.475064	4.45216	0.00182403	0.0437136	cytochrome P450, family 2, subfamily d, polypeptide 22	protein coding gene	ENSMUSG00000061740
P14_CB	Cyp2d22	current symbol	Cyp2d22	-0.513184	4.22508	9.38e-05	0.00680926	cytochrome P450, family 2, subfamily d, polypeptide 22	protein coding gene	ENSMUSG00000061740
P35_CB	Cyp2d22	current symbol	Cyp2d22	-0.358438	5.21314	0.00264168	0.010692	cytochrome P450, family 2, subfamily d, polypeptide 22	protein coding gene	ENSMUSG00000061740
P14_CB	Cyp2j12	current symbol	Cyp2j12	-1.31955	1.51992	1.7e-06	0.000227698	cytochrome P450, family 2, subfamily j, polypeptide 12	protein coding gene	ENSMUSG00000081225
P35_CB	Cyp2j6	current symbol	Cyp2j6	-0.450215	3.7231	0.0168529	0.0490841	cytochrome P450, family 2, subfamily j, polypeptide 6	protein coding gene	ENSMUSG00000052914
P14_CB	Cyp2j9	current symbol	Cyp2j9	-0.444397	4.61636	0.000216499	0.0137329	cytochrome P450, family 2, subfamily j, polypeptide 9	protein coding gene	ENSMUSG00000015224
P35_CB	Cyp4f13	current symbol	Cyp4f13	-0.832568	3.21946	0.000188283	0.00114036	cytochrome P450, family 4, subfamily f, polypeptide 13	protein coding gene	ENSMUSG00000024055
P35_CB	Cyp51	current symbol	Cyp51	-0.404993	6.36185	1.48e-05	0.00012642	cytochrome P450, family 51	protein coding gene	ENSMUSG00000001467
P35_HC	Cyr61	old symbol	Ccn1	1.23401	3.11413	0.000357772	0.0312552	cellular communication network factor 1	protein coding gene	ENSMUSG00000028195
P35_CB	Cyth1	current symbol	Cyth1	-0.430364	6.90948	6.12e-07	7.5e-06	cytohesin 1	protein coding gene	ENSMUSG00000017132
P35_CB	Cyth2	current symbol	Cyth2	0.254863	6.12708	0.00871436	0.0287535	cytohesin 2	protein coding gene	ENSMUSG00000003269
P35_CB	Cytsa	old symbol	Specc1l	0.231549	6.72532	0.00906633	0.0296969	sperm antigen with calponin homology and coiled-coil domains 1-like	protein coding gene	ENSMUSG00000033444
P35_CB	Cytsb	old symbol	Specc1	0.517453	7.59507	2.25e-09	4.56e-08	sperm antigen with calponin homology and coiled-coil domains 1	protein coding gene	ENSMUSG00000042331
P35_CB	D030025P21Rik	current symbol	D030025P21Rik	-1.67469	1.63028	1.27e-05	0.000110298	RIKEN cDNA D030025P21 gene	antisense lncRNA gene	ENSMUSG00000092130
P35_CB	D10627	old symbol	Zfp930	-0.903681	4.23774	1.62e-08	2.81e-07	zinc finger protein 930	protein coding gene	ENSMUSG00000059897
P14_HC	D10Bwg1379e	old symbol	Arfgef3	0.454235	5.8419	6.96e-05	0.00356449	ARFGEF family member 3	protein coding gene	ENSMUSG00000019852
P35_CB	D10Bwg1379e	old symbol	Arfgef3	0.508836	6.60366	1.89e-08	3.23e-07	ARFGEF family member 3	protein coding gene	ENSMUSG00000019852
P35_CB	D10Ertd610e	old symbol	Arhgef25	-0.45291	5.93465	7.46e-06	6.93e-05	Rho guanine nucleotide exchange factor (GEF) 25	protein coding gene	ENSMUSG00000019467
P35_CB	D10Wsu102e	current symbol	D10Wsu102e	0.353856	4.94474	0.00564572	0.0201791	DNA segment, Chr 10, Wayne State University 102, expressed	protein coding gene	ENSMUSG00000020255
P35_CB	D10Wsu52e	old symbol	Rtcb	0.261104	6.60469	0.0037506	0.0143652	RNA 2',3'-cyclic phosphate and 5'-OH ligase	protein coding gene	ENSMUSG00000001783
P35_CB	D11Bwg0517e	old symbol	Rbfox3	0.259648	8.88182	0.00585767	0.0207715	RNA binding protein, fox-1 homolog (C. elegans) 3	protein coding gene	ENSMUSG00000025576
P14_HC	D130040H23Rik	current symbol	D130040H23Rik	1.08791	1.31695	0.00155801	0.0386743	RIKEN cDNA D130040H23 gene	protein coding gene	ENSMUSG00000079038
P35_CB	D130040H23Rik	current symbol	D130040H23Rik	-1.38971	2.30147	6.47e-06	6.1e-05	RIKEN cDNA D130040H23 gene	protein coding gene	ENSMUSG00000079038
P35_CB	D14Abb1e	old symbol	Tasor	-0.742549	6.3501	1.96e-15	9.92e-14	transcription activation suppressor	protein coding gene	ENSMUSG00000040651
P35_CB	D17H6S56E-3	old symbol	Vwa7	-0.513579	5.24544	1.8e-05	0.000149913	von Willebrand factor A domain containing 7	protein coding gene	ENSMUSG00000007030
P35_CB	D17Wsu92e	old symbol	Ilrun	0.312066	8.17955	0.000505729	0.00267697	inflammation and lipid regulator with UBA-like and NBR1-like domains	protein coding gene	ENSMUSG00000056692
P35_CB	D2Ertd391e	old symbol	Atg13	0.28056	6.90788	0.0011214	0.00519481	autophagy related 13	protein coding gene	ENSMUSG00000027244
P35_CB	D3Bwg0562e	old symbol	Plppr4	0.21829	6.68896	0.0144621	0.0431558	phospholipid phosphatase related 4	protein coding gene	ENSMUSG00000044667
P35_CB	D3Ertd751e	current symbol	D3Ertd751e	-0.687978	4.36705	7.36e-06	6.84e-05	DNA segment, Chr 3, ERATO Doi 751, expressed	protein coding gene	ENSMUSG00000025766
P35_CB	D430041D05Rik	current symbol	D430041D05Rik	0.299553	8.04235	0.000734449	0.00367051	RIKEN cDNA D430041D05 gene	protein coding gene	ENSMUSG00000068373
P35_CB	D4Wsu53e	old symbol	Rsrp1	-0.880634	7.62426	6.6e-24	6.35e-22	arginine/serine rich protein 1	protein coding gene	ENSMUSG00000037266
P35_CB	D5Wsu178e	old symbol	Selenoi	0.383127	6.58327	2.16e-05	0.000175651	selenoprotein I	protein coding gene	ENSMUSG00000075703
P35_CB	D630037F22Rik	old symbol	Tbc1d32	-0.621117	3.75851	0.000913046	0.00440103	TBC1 domain family, member 32	protein coding gene	ENSMUSG00000038122
P14_CB	D630041G03Rik	current symbol	D630041G03Rik	0.67004	2.7601	0.000860182	0.0419453	RIKEN cDNA D630041G03 gene	lncRNA gene
P35_CB	D630045J12Rik	current symbol	D630045J12Rik	0.438249	5.63172	5.42e-05	0.000392774	RIKEN cDNA D630045J12 gene	protein coding gene	ENSMUSG00000063455
P35_CB	D6Wsu116e	old symbol	Washc2	0.310401	8.99783	0.00110489	0.00514446	WASH complex subunit 2`	protein coding gene	ENSMUSG00000024104
P35_CB	D7Ertd715e	old symbol	Snhg14	-1.59268	4.58048	1.13e-26	1.29e-24	small nucleolar RNA host gene 14	lncRNA gene	ENSMUSG00000100826
P14_CB	D8Ertd82e	old symbol	Prag1	0.50825	5.2458	1.3e-06	0.000175528	PEAK1 related kinase activating pseudokinase 1	protein coding gene	ENSMUSG00000050271
P35_CB	D8Ertd82e	old symbol	Prag1	1.07752	6.81621	4.02e-34	6.66e-32	PEAK1 related kinase activating pseudokinase 1	protein coding gene	ENSMUSG00000050271
P35_CB	D930016D06Rik	current symbol	D930016D06Rik	-0.766944	4.64237	5.47e-08	8.55e-07	RIKEN cDNA D930016D06 gene	lincRNA gene	ENSMUSG00000097392
P35_CB	D930048N14Rik	current symbol	D930048N14Rik	-1.02762	1.3512	0.0131086	0.0398668	RIKEN cDNA D930048N14 gene	protein coding gene	ENSMUSG00000052563
P35_CB	Daam2	current symbol	Daam2	0.274494	6.95689	0.0017577	0.0076148	dishevelled associated activator of morphogenesis 2	protein coding gene	ENSMUSG00000040260
P35_CB	Dab2	current symbol	Dab2	-0.450127	3.78817	0.0142419	0.0425835	disabled 2, mitogen-responsive phosphoprotein	protein coding gene	ENSMUSG00000022150
P35_HC	Dact2	current symbol	Dact2	0.736555	4.98042	0.000167765	0.0179508	dishevelled-binding antagonist of beta-catenin 2	protein coding gene	ENSMUSG00000048826
P35_CB	Dact3	current symbol	Dact3	-0.341913	5.74216	0.00110636	0.00514868	dishevelled-binding antagonist of beta-catenin 3	protein coding gene	ENSMUSG00000078794
P35_CB	Dad1	current symbol	Dad1	0.291357	5.58267	0.00726108	0.0248021	defender against cell death 1	protein coding gene	ENSMUSG00000022174
P35_CB	Dag1	current symbol	Dag1	0.389304	6.91534	6.8e-06	6.38e-05	dystroglycan 1	protein coding gene	ENSMUSG00000039952
P35_CB	Dagla	current symbol	Dagla	0.44669	7.30791	1.57e-07	2.2e-06	diacylglycerol lipase, alpha	protein coding gene	ENSMUSG00000035735
P35_CB	Dalrd3	current symbol	Dalrd3	-0.398184	6.14442	3.57e-05	0.000273319	DALR anticodon binding domain containing 3	protein coding gene	ENSMUSG00000019039
P35_CB	Dao	current symbol	Dao	0.310656	5.96353	0.00226443	0.00940803	D-amino acid oxidase	protein coding gene	ENSMUSG00000042096
P14_HC	Dapk1	current symbol	Dapk1	-0.347129	6.95328	0.000930538	0.0260852	death associated protein kinase 1	protein coding gene	ENSMUSG00000021559
P35_CB	Dapk3	current symbol	Dapk3	0.484104	5.05708	0.000110376	0.000731609	death-associated protein kinase 3	protein coding gene	ENSMUSG00000034974
P35_CB	Dbc1	old symbol	Brinp1	0.350334	7.25215	4.26e-05	0.000318073	bone morphogenic protein/retinoic acid inducible neural specific 1	protein coding gene	ENSMUSG00000028351
P14_HC	Dbn1	current symbol	Dbn1	-0.353779	8.37234	0.00157781	0.0390263	drebrin 1	protein coding gene	ENSMUSG00000034675
P35_CB	Dbnl	current symbol	Dbnl	0.294864	5.88851	0.00336346	0.0131058	drebrin-like	protein coding gene	ENSMUSG00000020476
P35_CB	Dcaf12	current symbol	Dcaf12	0.515148	6.50169	1.87e-08	3.21e-07	DDB1 and CUL4 associated factor 12	protein coding gene	ENSMUSG00000028436
P35_CB	Dcaf12l1	current symbol	Dcaf12l1	0.371861	4.67406	0.00700325	0.0240948	DDB1 and CUL4 associated factor 12-like 1	protein coding gene	ENSMUSG00000045284
P35_CB	Dcaf15	current symbol	Dcaf15	-0.820957	4.71244	2.83e-09	5.67e-08	DDB1 and CUL4 associated factor 15	protein coding gene	ENSMUSG00000037103
P35_CB	Dcaf17	current symbol	Dcaf17	-0.73052	4.30882	2.44e-06	2.59e-05	DDB1 and CUL4 associated factor 17	protein coding gene	ENSMUSG00000041966
P35_CB	Dcakd	current symbol	Dcakd	0.581808	5.19041	1.24e-06	1.41e-05	dephospho-CoA kinase domain containing	protein coding gene	ENSMUSG00000020935
P35_CB	Dci	old symbol	Eci1	0.400099	4.43704	0.00694307	0.0239219	enoyl-Coenzyme A delta isomerase 1	protein coding gene	ENSMUSG00000024132
P35_CB	Dclk1	current symbol	Dclk1	0.329719	9.14974	0.00063106	0.00322393	doublecortin-like kinase 1	protein coding gene	ENSMUSG00000027797
P14_CB	Dclk3	current symbol	Dclk3	-1.2571	2.29811	5.12e-08	9.81e-06	doublecortin-like kinase 3	protein coding gene	ENSMUSG00000032500
P35_CB	Dclre1c	current symbol	Dclre1c	-0.823136	3.68708	1.88e-05	0.000155255	DNA cross-link repair 1C	protein coding gene	ENSMUSG00000026648
P35_CB	Dcn	current symbol	Dcn	-1.04303	4.82127	1.44e-14	6.5e-13	decorin	protein coding gene	ENSMUSG00000019929
P14_HC	Dcp2	current symbol	Dcp2	0.494117	5.99801	9.95e-06	0.00074207	decapping mRNA 2	protein coding gene	ENSMUSG00000024472
P14_HC	Dcp2	old symbol	Dxcp2	0.494117	5.99801	9.95e-06	0.00074207	dexamethasone induced cleft palate 2	QTL
P35_CB	Dctn1	current symbol	Dctn1	0.511888	8.7388	4.24e-08	6.8e-07	dynactin 1	protein coding gene	ENSMUSG00000031865
P35_CB	Dctn2	current symbol	Dctn2	0.281662	7.95447	0.00143662	0.00641555	dynactin 2	protein coding gene	ENSMUSG00000025410
P35_CB	Dctn3	current symbol	Dctn3	0.295123	5.70102	0.00503936	0.0183574	dynactin 3	protein coding gene	ENSMUSG00000028447
P35_CB	Dctpp1	current symbol	Dctpp1	0.704323	2.9187	0.00477757	0.0175891	dCTP pyrophosphatase 1	protein coding gene	ENSMUSG00000042462
P35_CB	Dcun1d1	current symbol	Dcun1d1	-0.392658	5.82115	0.000137214	0.000874107	DCN1, defective in cullin neddylation 1, domain containing 1 (S. cerevisiae)	protein coding gene	ENSMUSG00000027708
P35_CB	Dcun1d5	current symbol	Dcun1d5	-0.414471	5.20263	0.000586006	0.00303167	DCN1, defective in cullin neddylation 1, domain containing 5 (S. cerevisiae)	protein coding gene	ENSMUSG00000032002
P35_CB	Ddb1	current symbol	Ddb1	0.480687	8.20967	9.35e-08	1.4e-06	damage specific DNA binding protein 1	protein coding gene	ENSMUSG00000024740
P35_CB	Ddb2	current symbol	Ddb2	-0.538219	4.87701	3.96e-05	0.000299188	damage specific DNA binding protein 2	protein coding gene	ENSMUSG00000002109
P35_CB	Ddhd1	current symbol	Ddhd1	-0.276881	5.8538	0.00665579	0.0230736	DDHD domain containing 1	protein coding gene	ENSMUSG00000037697
P35_CB	Ddit4	current symbol	Ddit4	0.555149	5.93428	2.8e-08	4.64e-07	DNA-damage-inducible transcript 4	protein coding gene	ENSMUSG00000020108
P14_CB	Ddr2	current symbol	Ddr2	0.44437	4.99768	6.12e-05	0.00494725	discoidin domain receptor family, member 2	protein coding gene	ENSMUSG00000026674
P35_CB	Ddr2	current symbol	Ddr2	-0.863769	3.83552	2.06e-06	2.23e-05	discoidin domain receptor family, member 2	protein coding gene	ENSMUSG00000026674
P35_CB	Ddt	current symbol	Ddt	0.439992	5.19801	0.00026015	0.00150983	D-dopachrome tautomerase	protein coding gene	ENSMUSG00000001666
P35_CB	Ddx1	current symbol	Ddx1	0.273691	7.25667	0.00126065	0.00574193	DEAD (Asp-Glu-Ala-Asp) box polypeptide 1	protein coding gene	ENSMUSG00000037149
P35_CB	Ddx11	current symbol	Ddx11	-0.962895	2.45761	0.000882868	0.00428005	DEAD/H (Asp-Glu-Ala-Asp/His) box helicase 11	protein coding gene	ENSMUSG00000035842
P35_CB	Ddx17	current symbol	Ddx17	-0.570155	9.10647	3.08e-09	6.11e-08	DEAD (Asp-Glu-Ala-Asp) box polypeptide 17	protein coding gene	ENSMUSG00000055065
P35_CB	Ddx21	current symbol	Ddx21	0.348915	5.37597	0.00241985	0.00993825	DEAD (Asp-Glu-Ala-Asp) box polypeptide 21	protein coding gene	ENSMUSG00000020075
P35_CB	Ddx24	current symbol	Ddx24	0.451598	7.46954	1.48e-07	2.1e-06	DEAD (Asp-Glu-Ala-Asp) box polypeptide 24	protein coding gene	ENSMUSG00000041645
P14_HC	Ddx26b	old symbol	Ints6l	-0.386958	5.58995	0.00111449	0.0300869	integrator complex subunit 6 like	protein coding gene	ENSMUSG00000035967
P35_CB	Ddx26b	old symbol	Ints6l	-1.71371	5.89508	4.49e-58	2.24e-55	integrator complex subunit 6 like	protein coding gene	ENSMUSG00000035967
P14_HC	Ddx3y	current symbol	Ddx3y	-0.817433	6.07339	1.82e-13	9.73e-11	DEAD (Asp-Glu-Ala-Asp) box polypeptide 3, Y-linked	protein coding gene	ENSMUSG00000069045
P14_CB	Ddx3y	current symbol	Ddx3y	-0.973782	7.87775	3.48e-23	2.53e-20	DEAD (Asp-Glu-Ala-Asp) box polypeptide 3, Y-linked	protein coding gene	ENSMUSG00000069045
P35_CB	Ddx3y	current symbol	Ddx3y	-0.698978	6.39715	5.32e-14	2.22e-12	DEAD (Asp-Glu-Ala-Asp) box polypeptide 3, Y-linked	protein coding gene	ENSMUSG00000069045
P35_CB	Ddx41	current symbol	Ddx41	-0.435413	4.80646	0.000996069	0.00473019	DEAD (Asp-Glu-Ala-Asp) box polypeptide 41	protein coding gene	ENSMUSG00000021494
P35_CB	Ddx5	current symbol	Ddx5	-0.25458	10.3592	0.0101084	0.0325564	DEAD (Asp-Glu-Ala-Asp) box polypeptide 5	protein coding gene	ENSMUSG00000020719
P35_CB	Ddx50	current symbol	Ddx50	-0.249967	6.20111	0.00899576	0.0295087	DEAD (Asp-Glu-Ala-Asp) box polypeptide 50	protein coding gene	ENSMUSG00000020076
P35_CB	Ddx52	current symbol	Ddx52	-0.306447	5.15518	0.0116204	0.0363494	DEAD (Asp-Glu-Ala-Asp) box polypeptide 52	protein coding gene	ENSMUSG00000020677
P35_CB	Ddx54	current symbol	Ddx54	0.34987	5.33108	0.00274791	0.0110457	DEAD (Asp-Glu-Ala-Asp) box polypeptide 54	protein coding gene	ENSMUSG00000029599
P35_CB	Ddx55	current symbol	Ddx55	-0.395013	4.40131	0.0088279	0.0290337	DEAD (Asp-Glu-Ala-Asp) box polypeptide 55	protein coding gene	ENSMUSG00000029389
P35_CB	Ddx6	current symbol	Ddx6	0.366328	7.89319	3.25e-05	0.000251184	DEAD (Asp-Glu-Ala-Asp) box polypeptide 6	protein coding gene	ENSMUSG00000032097
P35_CB	Def8	current symbol	Def8	0.232952	6.44056	0.0114085	0.0358044	differentially expressed in FDCP 8	protein coding gene	ENSMUSG00000001482
P35_CB	Dek	current symbol	Dek	-0.237663	6.62522	0.00813312	0.0272424	DEK oncogene (DNA binding)	protein coding gene	ENSMUSG00000021377
P35_CB	Dennd1a	current symbol	Dennd1a	0.284071	5.75137	0.00652765	0.0227464	DENN/MADD domain containing 1A	protein coding gene	ENSMUSG00000035392
P35_CB	Dennd3	current symbol	Dennd3	-0.687141	3.00207	0.00500372	0.0182663	DENN/MADD domain containing 3	protein coding gene	ENSMUSG00000036661
P35_CB	Dennd5b	current symbol	Dennd5b	0.332679	6.64298	0.000199051	0.00119911	DENN/MADD domain containing 5B	protein coding gene	ENSMUSG00000030313
P35_CB	Derl1	current symbol	Derl1	0.230546	6.71148	0.00894737	0.0293707	Der1-like domain family, member 1	protein coding gene	ENSMUSG00000022365
P35_CB	Des	current symbol	Des	-0.972052	2.5793	0.000455956	0.00245028	desmin	protein coding gene	ENSMUSG00000026208
P35_CB	Dffb	current symbol	Dffb	-0.753918	3.11038	0.00114849	0.00530272	DNA fragmentation factor, beta subunit	protein coding gene	ENSMUSG00000029027
P35_CB	Dgat1	current symbol	Dgat1	-0.464309	4.40156	0.00225617	0.00938368	diacylglycerol O-acyltransferase 1	protein coding gene	ENSMUSG00000022555
P14_HC	Dgat2	current symbol	Dgat2	-0.691827	6.39337	1.38e-10	4.06e-08	diacylglycerol O-acyltransferase 2	protein coding gene	ENSMUSG00000030747
P35_CB	Dgat2	current symbol	Dgat2	-0.543046	3.83813	0.00294417	0.0117124	diacylglycerol O-acyltransferase 2	protein coding gene	ENSMUSG00000030747
P35_CB	Dgcr8	current symbol	Dgcr8	-0.289285	5.74774	0.00577403	0.0205235	DGCR8, microprocessor complex subunit	protein coding gene	ENSMUSG00000022718
P35_CB	Dgkd	current symbol	Dgkd	0.281532	8.69922	0.00247249	0.0101046	diacylglycerol kinase, delta	protein coding gene	ENSMUSG00000070738
P35_CB	Dgkd	old symbol	Dgkq	0.281532	8.69922	0.00247249	0.0101046	diacylglycerol kinase, theta	protein coding gene	ENSMUSG00000004815
P35_CB	Dgke	current symbol	Dgke	-0.316957	6.20156	0.000964613	0.00461004	diacylglycerol kinase, epsilon	protein coding gene	ENSMUSG00000000276
P35_CB	Dgkg	current symbol	Dgkg	0.628585	8.01529	1.77e-12	5.89e-11	diacylglycerol kinase, gamma	protein coding gene	ENSMUSG00000022861
P35_CB	Dgkh	current symbol	Dgkh	0.668699	4.44952	8.3e-06	7.58e-05	diacylglycerol kinase, eta	protein coding gene	ENSMUSG00000034731
P35_HC	Dgkh	current symbol	Dgkh	-0.983232	4.72406	5.03e-06	0.00100457	diacylglycerol kinase, eta	protein coding gene	ENSMUSG00000034731
P14_CB	Dgkk	current symbol	Dgkk	-1.29474	1.28745	7.14e-06	0.000796212	diacylglycerol kinase kappa	protein coding gene	ENSMUSG00000062393
P35_CB	Dgkq	current symbol	Dgkq	-0.706389	5.98874	1.44e-12	4.89e-11	diacylglycerol kinase, theta	protein coding gene	ENSMUSG00000004815
P35_CB	Dhcr24	current symbol	Dhcr24	0.281378	6.6308	0.0016966	0.00739051	24-dehydrocholesterol reductase	protein coding gene	ENSMUSG00000034926
P14_HC	Dhcr7	current symbol	Dhcr7	0.3771	5.92717	0.000809387	0.0235452	7-dehydrocholesterol reductase	protein coding gene	ENSMUSG00000058454
P35_CB	Dhdds	current symbol	Dhdds	0.319553	6.16097	0.000973548	0.00464615	dehydrodolichyl diphosphate synthase	protein coding gene	ENSMUSG00000012117
P35_CB	Dhtkd1	current symbol	Dhtkd1	-0.871482	1.93191	0.011312	0.0355497	dehydrogenase E1 and transketolase domain containing 1	protein coding gene	ENSMUSG00000025815
P35_CB	Dhx30	current symbol	Dhx30	0.230233	6.95251	0.00748465	0.025424	DEAH (Asp-Glu-Ala-His) box polypeptide 30	protein coding gene	ENSMUSG00000032480
P35_CB	Dhx33	current symbol	Dhx33	0.268461	5.6339	0.0116162	0.0363447	DEAH (Asp-Glu-Ala-His) box polypeptide 33	protein coding gene	ENSMUSG00000040620
P35_CB	Dhx37	current symbol	Dhx37	0.469141	4.56438	0.00107056	0.00502029	DEAH (Asp-Glu-Ala-His) box polypeptide 37	protein coding gene	ENSMUSG00000029480
P35_CB	Dhx38	current symbol	Dhx38	0.461212	5.78346	9.91e-06	8.84e-05	DEAH (Asp-Glu-Ala-His) box polypeptide 38	protein coding gene	ENSMUSG00000037993
P35_CB	Dhx8	current symbol	Dhx8	0.758067	5.92873	9.92e-14	3.97e-12	DEAH (Asp-Glu-Ala-His) box polypeptide 8	protein coding gene	ENSMUSG00000034931
P35_CB	Dhx9	current symbol	Dhx9	0.527249	7.46669	9.99e-10	2.13e-08	DEAH (Asp-Glu-Ala-His) box polypeptide 9	protein coding gene	ENSMUSG00000042699
P35_CB	Dimt1	current symbol	Dimt1	-0.587065	4.54064	4.34e-05	0.000322855	DIM1 dimethyladenosine transferase 1-like (S. cerevisiae)	protein coding gene	ENSMUSG00000021692
P14_HC	Dio2	current symbol	Dio2	-0.449567	6.85204	1.93e-05	0.00127046	deiodinase, iodothyronine, type II	protein coding gene	ENSMUSG00000007682
P35_CB	Dip2b	current symbol	Dip2b	0.48667	7.05507	1.12e-08	2e-07	disco interacting protein 2 homolog B	protein coding gene	ENSMUSG00000023026
P35_CB	Dip2c	current symbol	Dip2c	0.259085	6.28524	0.00641036	0.0223996	disco interacting protein 2 homolog C	protein coding gene	ENSMUSG00000048264
P35_CB	Diras1	current symbol	Diras1	0.368587	7.25224	1.26e-05	0.00010973	DIRAS family, GTP-binding RAS-like 1	protein coding gene	ENSMUSG00000043670
P35_CB	Diras2	current symbol	Diras2	0.67719	9.55057	1.2e-11	3.56e-10	DIRAS family, GTP-binding RAS-like 2	protein coding gene	ENSMUSG00000047842
P35_CB	Dis3	current symbol	Dis3	-0.635108	4.46658	1.84e-05	0.000152537	DIS3 homolog, exosome endoribonuclease and 3'-5' exoribonuclease	protein coding gene	ENSMUSG00000033166
P35_CB	Disp2	current symbol	Disp2	0.485095	8.09056	5.62e-08	8.78e-07	dispatched RND tramsporter family member 2	protein coding gene	ENSMUSG00000040035
P35_CB	Dlc1	current symbol	Dlc1	0.746799	6.80467	1.74e-17	1.09e-15	deleted in liver cancer 1	protein coding gene	ENSMUSG00000031523
P35_CB	Dlg3	current symbol	Dlg3	0.405312	6.73324	4.81e-06	4.69e-05	discs large MAGUK scaffold protein 3	protein coding gene	ENSMUSG00000000881
P35_CB	Dlg4	current symbol	Dlg4	0.278724	8.66715	0.00265596	0.0107369	discs large MAGUK scaffold protein 4	protein coding gene	ENSMUSG00000020886
P35_CB	Dlgap2	current symbol	Dlgap2	1.24347	1.01471	0.00569483	0.0203062	DLG associated protein 2	protein coding gene	ENSMUSG00000047495
P35_CB	Dlgap4	current symbol	Dlgap4	0.267487	7.44653	0.00181847	0.0078303	DLG associated protein 4	protein coding gene	ENSMUSG00000061689
P35_CB	Dlk1	current symbol	Dlk1	1.00101	1.89022	0.00513301	0.018603	delta like non-canonical Notch ligand 1	protein coding gene	ENSMUSG00000040856
P35_CB	Dll1	current symbol	Dll1	-1.05429	2.02129	0.00139991	0.00628493	delta like canonical Notch ligand 1	protein coding gene	ENSMUSG00000014773
P35_CB	Dlst	current symbol	Dlst	0.225912	7.32397	0.00841695	0.0279638	dihydrolipoamide S-succinyltransferase (E2 component of 2-oxo-glutarate complex)	protein coding gene	ENSMUSG00000004789
P35_CB	Dmap1	current symbol	Dmap1	0.349432	4.50664	0.0165038	0.0482315	DNA methyltransferase 1-associated protein 1	protein coding gene	ENSMUSG00000009640
P35_CB	Dmpk	current symbol	Dmpk	-0.902121	3.8848	5.33e-07	6.66e-06	dystrophia myotonica-protein kinase	protein coding gene	ENSMUSG00000030409
P35_CB	Dmtf1	current symbol	Dmtf1	-0.761167	6.15952	3.07e-15	1.52e-13	cyclin D binding myb-like transcription factor 1	protein coding gene	ENSMUSG00000042508
P35_CB	Dmxl1	current symbol	Dmxl1	-0.276594	6.95877	0.00130446	0.00590951	Dmx-like 1	protein coding gene	ENSMUSG00000037416
P35_CB	Dna2	current symbol	Dna2	-0.946855	1.6626	0.0127173	0.0389317	DNA replication helicase/nuclease 2	protein coding gene	ENSMUSG00000036875
P14_HC	Dnahc11	old symbol	Dnah11	1.23469	1.40425	0.000243827	0.0097348	dynein, axonemal, heavy chain 11	protein coding gene	ENSMUSG00000018581
P14_CB	Dnahc11	old symbol	Dnah11	-0.613875	3.26113	0.000209625	0.013455	dynein, axonemal, heavy chain 11	protein coding gene	ENSMUSG00000018581
P35_CB	Dnahc11	old symbol	Dnah11	-1.25657	4.0115	1.19e-12	4.06e-11	dynein, axonemal, heavy chain 11	protein coding gene	ENSMUSG00000018581
P14_HC	Dnahc3	old symbol	Dnah3	1.23564	0.982064	0.00109272	0.0295681	dynein, axonemal, heavy chain 3	protein coding gene	ENSMUSG00000052273
P14_HC	Dnahc3	old symbol	Dnah12	1.23564	0.982064	0.00109272	0.0295681	dynein, axonemal, heavy chain 12	protein coding gene	ENSMUSG00000021879
P14_HC	Dnahc5	old symbol	Dnah5	0.754834	3.11316	0.000492194	0.0165368	dynein, axonemal, heavy chain 5	protein coding gene	ENSMUSG00000022262
P35_CB	Dnahc6	old symbol	Dnah6	0.567073	3.82732	0.00189636	0.00812156	dynein, axonemal, heavy chain 6	protein coding gene	ENSMUSG00000052861
P35_CB	Dnahc7b	old symbol	Dnah7b	-1.80472	3.26357	7.88e-15	3.69e-13	dynein, axonemal, heavy chain 7B	protein coding gene	ENSMUSG00000041144
P35_CB	Dnaja3	current symbol	Dnaja3	0.358986	6.14571	0.000216448	0.00128951	DnaJ heat shock protein family (Hsp40) member A3	protein coding gene	ENSMUSG00000004069
P35_CB	Dnajb1	current symbol	Dnajb1	0.666465	5.49428	2.63e-09	5.27e-08	DnaJ heat shock protein family (Hsp40) member B1	protein coding gene	ENSMUSG00000005483
P35_CB	Dnajb2	current symbol	Dnajb2	0.261382	7.05398	0.00216951	0.00909496	DnaJ heat shock protein family (Hsp40) member B2	protein coding gene	ENSMUSG00000026203
P35_CB	Dnajb6	current symbol	Dnajb6	0.203739	7.33482	0.017118	0.0497059	DnaJ heat shock protein family (Hsp40) member B6	protein coding gene	ENSMUSG00000029131
P35_CB	Dnajc10	current symbol	Dnajc10	-0.288636	6.48544	0.00161302	0.00706983	DnaJ heat shock protein family (Hsp40) member C10	protein coding gene	ENSMUSG00000027006
P35_CB	Dnajc3	current symbol	Dnajc3	-0.22246	6.48554	0.0145095	0.0432782	DnaJ heat shock protein family (Hsp40) member C3	protein coding gene	ENSMUSG00000022136
P35_CB	Dnajc30	current symbol	Dnajc30	0.385076	4.55949	0.00675212	0.0233595	DnaJ heat shock protein family (Hsp40) member C30	protein coding gene	ENSMUSG00000061118
P35_CB	Dnajc5	current symbol	Dnajc5	0.224522	8.52246	0.0143504	0.0428699	DnaJ heat shock protein family (Hsp40) member C5	protein coding gene	ENSMUSG00000000826
P35_CB	Dnajc6	current symbol	Dnajc6	0.342149	8.12603	0.000131471	0.000845653	DnaJ heat shock protein family (Hsp40) member C6	protein coding gene	ENSMUSG00000028528
P14_HC	Dnali1	current symbol	Dnali1	1.65091	1.30367	3.55e-06	0.000314727	dynein, axonemal, light intermediate polypeptide 1	protein coding gene	ENSMUSG00000042707
P35_CB	Dner	current symbol	Dner	0.435679	9.55687	1.22e-05	0.000106559	delta/notch-like EGF repeat containing	protein coding gene	ENSMUSG00000036766
P35_CB	Dnm1	current symbol	Dnm1	0.581758	10.3903	4.53e-09	8.73e-08	dynamin 1	protein coding gene	ENSMUSG00000026825
P35_CB	Dnm3	current symbol	Dnm3	0.595734	8.15022	3.16e-11	8.78e-10	dynamin 3	protein coding gene	ENSMUSG00000040265
P35_CB	Dnmt1	current symbol	Dnmt1	0.724769	6.39378	9.35e-15	4.33e-13	DNA methyltransferase (cytosine-5) 1	protein coding gene	ENSMUSG00000004099
P35_CB	Dnmt3a	current symbol	Dnmt3a	0.224174	7.86894	0.0105621	0.0337276	DNA methyltransferase 3A	protein coding gene	ENSMUSG00000020661
P35_CB	Doc2b	current symbol	Doc2b	0.402377	7.19515	2.22e-06	2.38e-05	double C2, beta	protein coding gene	ENSMUSG00000020848
P35_HC	Doc2b	current symbol	Doc2b	-0.718531	6.61028	1.22e-06	0.000280399	double C2, beta	protein coding gene	ENSMUSG00000020848
P35_CB	Doc2g	current symbol	Doc2g	0.581827	3.09918	0.014058	0.0421084	double C2, gamma	protein coding gene	ENSMUSG00000024871
P14_HC	Dock10	current symbol	Dock10	-0.439451	5.75688	0.000145792	0.00642495	dedicator of cytokinesis 10	protein coding gene	ENSMUSG00000038608
P35_CB	Dock3	current symbol	Dock3	0.292106	7.75848	0.000824932	0.00404304	dedicator of cyto-kinesis 3	protein coding gene	ENSMUSG00000039716
P35_CB	Dock6	current symbol	Dock6	-1.22247	3.37844	2.03e-08	3.44e-07	dedicator of cytokinesis 6	protein coding gene	ENSMUSG00000032198
P35_CB	Dock7	current symbol	Dock7	-0.348889	5.65163	0.00120263	0.00550931	dedicator of cytokinesis 7	protein coding gene	ENSMUSG00000028556
P35_CB	Dok3	current symbol	Dok3	-1.1198	1.18398	0.0100502	0.0323998	docking protein 3	protein coding gene	ENSMUSG00000035711
P14_HC	Dok6	current symbol	Dok6	0.777233	3.88429	1.28e-05	0.000904854	docking protein 6	protein coding gene	ENSMUSG00000073514
P35_HC	Dok6	current symbol	Dok6	-1.07814	3.8941	0.000112592	0.0131704	docking protein 6	protein coding gene	ENSMUSG00000073514
P35_CB	Donson	current symbol	Donson	-0.487875	4.35248	0.00155194	0.00684661	downstream neighbor of SON	protein coding gene	ENSMUSG00000022960
P35_CB	Dopey2	old symbol	Dop1b	0.26028	6.87891	0.00261221	0.0105823	DOP1 leucine zipper like protein B	protein coding gene	ENSMUSG00000022946
P35_CB	Dot1l	current symbol	Dot1l	-0.772909	7.01859	2.49e-19	1.81e-17	DOT1-like, histone H3 methyltransferase (S. cerevisiae)	protein coding gene	ENSMUSG00000061589
P35_CB	Dpp10	current symbol	Dpp10	-0.285254	7.82213	0.00118598	0.00544967	dipeptidylpeptidase 10	protein coding gene	ENSMUSG00000036815
P35_CB	Dpp3	current symbol	Dpp3	0.323939	5.62648	0.00221897	0.00925338	dipeptidylpeptidase 3	protein coding gene	ENSMUSG00000063904
P35_CB	Dpp4	current symbol	Dpp4	-1.27883	1.82919	0.000457266	0.00245514	dipeptidylpeptidase 4	protein coding gene	ENSMUSG00000035000
P35_CB	Dpp6	current symbol	Dpp6	0.398328	8.37756	1.16e-05	0.000102061	dipeptidylpeptidase 6	protein coding gene	ENSMUSG00000061576
P35_CB	Dpp7	current symbol	Dpp7	-0.700039	4.20379	1.19e-05	0.00010417	dipeptidylpeptidase 7	protein coding gene	ENSMUSG00000026958
P35_CB	Dpp9	current symbol	Dpp9	0.616206	6.04182	4.54e-10	1.02e-08	dipeptidylpeptidase 9	protein coding gene	ENSMUSG00000001229
P35_CB	Dpy19l4	current symbol	Dpy19l4	-0.620001	4.66168	8.79e-06	7.95e-05	dpy-19-like 4 (C. elegans)	protein coding gene	ENSMUSG00000045205
P35_CB	Dpysl2	current symbol	Dpysl2	0.501733	6.38923	6.04e-08	9.34e-07	dihydropyrimidinase-like 2	protein coding gene	ENSMUSG00000022048
P35_CB	Dpysl3	current symbol	Dpysl3	0.639832	3.40505	0.002439	0.00999471	dihydropyrimidinase-like 3	protein coding gene	ENSMUSG00000024501
P14_HC	Dpysl4	current symbol	Dpysl4	-0.442776	6.70028	2.94e-05	0.00182828	dihydropyrimidinase-like 4	protein coding gene	ENSMUSG00000025478
P35_CB	Dpysl5	current symbol	Dpysl5	0.623054	5.51641	2.17e-08	3.68e-07	dihydropyrimidinase-like 5	protein coding gene	ENSMUSG00000029168
P35_CB	Dram2	current symbol	Dram2	-0.334995	4.66381	0.0152936	0.045187	DNA-damage regulated autophagy modulator 2	protein coding gene	ENSMUSG00000027900
P14_HC	Drd2	current symbol	Drd2	-1.47137	2.00349	3.25e-07	4.14e-05	dopamine receptor D2	protein coding gene	ENSMUSG00000032259
P35_CB	Drg1	current symbol	Drg1	0.255011	6.0125	0.0100104	0.0323167	developmentally regulated GTP binding protein 1	protein coding gene	ENSMUSG00000020457
P35_CB	Dsc2	current symbol	Dsc2	-0.971426	1.53809	0.0130946	0.0398501	desmocollin 2	protein coding gene	ENSMUSG00000024331
P14_HC	Dsp	current symbol	Dsp	-0.920265	5.18851	1.01e-12	4.85e-10	desmoplakin	protein coding gene	ENSMUSG00000054889
P35_HC	Dsp	current symbol	Dsp	-1.2084	5.81182	1.44e-12	1.17e-09	desmoplakin	protein coding gene	ENSMUSG00000054889
P35_CB	Dtd1	current symbol	Dtd1	0.347738	5.43705	0.00220381	0.0092044	D-tyrosyl-tRNA deacylase 1	protein coding gene	ENSMUSG00000027430
P35_HC	Dtl	current symbol	Dtl	2.19766	2.1721	5.09e-06	0.00100457	denticleless E3 ubiquitin protein ligase	protein coding gene	ENSMUSG00000037474
P35_CB	Dtnbp1	current symbol	Dtnbp1	0.386114	5.04385	0.00197358	0.00838606	dystrobrevin binding protein 1	protein coding gene	ENSMUSG00000057531
P35_CB	Dtx1	current symbol	Dtx1	0.286421	6.78493	0.00106415	0.00499717	deltex 1, E3 ubiquitin ligase	protein coding gene	ENSMUSG00000029603
P35_CB	Dtx3	current symbol	Dtx3	-0.332859	7.34133	9.85e-05	0.000660403	deltex 3, E3 ubiquitin ligase	protein coding gene	ENSMUSG00000040415
P35_CB	Dtymk	current symbol	Dtymk	-0.351737	4.49172	0.016922	0.0492496	deoxythymidylate kinase	protein coding gene	ENSMUSG00000026281
P35_CB	Dus3l	current symbol	Dus3l	-1.1091	6.11741	4.22e-29	5.57e-27	dihydrouridine synthase 3-like (S. cerevisiae)	protein coding gene	ENSMUSG00000007603
P14_CB	Dusp1	current symbol	Dusp1	0.403112	4.76772	0.000593224	0.0321039	dual specificity phosphatase 1	protein coding gene	ENSMUSG00000024190
P35_CB	Dusp1	current symbol	Dusp1	0.557008	6.55821	8.95e-10	1.92e-08	dual specificity phosphatase 1	protein coding gene	ENSMUSG00000024190
P35_HC	Dusp1	current symbol	Dusp1	1.08388	4.91329	6.82e-08	2.09e-05	dual specificity phosphatase 1	protein coding gene	ENSMUSG00000024190
P35_CB	Dusp11	current symbol	Dusp11	-1.10167	6.95643	5e-37	9.36e-35	dual specificity phosphatase 11 (RNA/RNP complex 1-interacting)	protein coding gene	ENSMUSG00000030002
P35_CB	Dusp12	current symbol	Dusp12	-0.596819	3.58315	0.00253335	0.0103155	dual specificity phosphatase 12	protein coding gene	ENSMUSG00000026659
P35_CB	Dusp14	current symbol	Dusp14	0.593422	3.7794	0.00155533	0.00685709	dual specificity phosphatase 14	protein coding gene	ENSMUSG00000018648
P35_CB	Dusp15	current symbol	Dusp15	-0.99504	4.60191	4.55e-12	1.43e-10	dual specificity phosphatase-like 15	protein coding gene	ENSMUSG00000042662
P35_CB	Dusp16	current symbol	Dusp16	0.314239	5.76113	0.00273036	0.0109817	dual specificity phosphatase 16	protein coding gene	ENSMUSG00000030203
P35_CB	Dusp18	current symbol	Dusp18	-0.508453	3.57189	0.0102175	0.0328216	dual specificity phosphatase 18	protein coding gene	ENSMUSG00000047205
P35_CB	Dusp4	current symbol	Dusp4	1.16285	2.94061	2.9e-06	3.01e-05	dual specificity phosphatase 4	protein coding gene	ENSMUSG00000031530
P35_CB	Dusp5	current symbol	Dusp5	0.620442	6.01143	2.93e-10	6.87e-09	dual specificity phosphatase 5	protein coding gene	ENSMUSG00000034765
P35_CB	Dusp8	current symbol	Dusp8	0.540786	6.67743	1.47e-09	3.06e-08	dual specificity phosphatase 8	protein coding gene	ENSMUSG00000037887
P35_CB	Dvl1	current symbol	Dvl1	-0.727777	6.94788	3.8e-17	2.29e-15	dishevelled segment polarity protein 1	protein coding gene	ENSMUSG00000029071
P35_CB	Dvl2	current symbol	Dvl2	-0.423032	4.27464	0.00746689	0.0253889	dishevelled segment polarity protein 2	protein coding gene	ENSMUSG00000020888
P35_CB	Dym	current symbol	Dym	0.505818	6.13157	1.56e-07	2.19e-06	dymeclin	protein coding gene	ENSMUSG00000035765
P35_CB	Dync1h1	current symbol	Dync1h1	0.636613	9.03284	2.93e-11	8.2e-10	dynein cytoplasmic 1 heavy chain 1	protein coding gene	ENSMUSG00000018707
P35_CB	Dync1i1	current symbol	Dync1i1	0.371919	7.18337	1.21e-05	0.000106284	dynein cytoplasmic 1 intermediate chain 1	protein coding gene	ENSMUSG00000029757
P35_CB	Dync1li1	current symbol	Dync1li1	0.430471	6.1736	8.83e-06	7.98e-05	dynein cytoplasmic 1 light intermediate chain 1	protein coding gene	ENSMUSG00000032435
P35_CB	Dynll1	current symbol	Dynll1	0.566257	6.12605	6.49e-09	1.21e-07	dynein light chain LC8-type 1	protein coding gene	ENSMUSG00000009013
P35_CB	Dynll2	current symbol	Dynll2	0.371005	9.36422	0.000153787	0.000958249	dynein light chain LC8-type 2	protein coding gene	ENSMUSG00000020483
P35_CB	Dynlrb1	current symbol	Dynlrb1	0.379303	6.40213	4.07e-05	0.000305824	dynein light chain roadblock-type 1	protein coding gene	ENSMUSG00000047459
P14_CB	Dynlt1a	current symbol	Dynlt1a	0.916697	2.25705	8.18e-05	0.00610266	dynein light chain Tctex-type 1A	protein coding gene	ENSMUSG00000092074
P35_CB	Dynlt3	current symbol	Dynlt3	-0.493732	6.78691	1.89e-08	3.22e-07	dynein light chain Tctex-type 3	protein coding gene	ENSMUSG00000031176
P35_CB	Dyrk3	current symbol	Dyrk3	0.764669	2.70016	0.00435797	0.0162709	dual-specificity tyrosine-(Y)-phosphorylation regulated kinase 3	protein coding gene	ENSMUSG00000016526
P35_CB	Dzip1	current symbol	Dzip1	-0.602181	5.38356	1.55e-07	2.19e-06	DAZ interacting protein 1	protein coding gene	ENSMUSG00000042156
P35_CB	Dzip1l	current symbol	Dzip1l	-0.529057	3.48422	0.0105837	0.0337886	DAZ interacting protein 1-like	protein coding gene	ENSMUSG00000037784
P35_CB	Dzip3	current symbol	Dzip3	-0.769971	6.60696	1.48e-17	9.34e-16	DAZ interacting protein 3, zinc finger	protein coding gene	ENSMUSG00000064061
P35_CB	E030010A14Rik	old symbol	Tmem252	-2.25861	1.35751	6.37e-07	7.78e-06	transmembrane protein 252	protein coding gene	ENSMUSG00000048572
P14_HC	E030010N08Rik	old symbol	Crocc2	1.33425	1.08337	0.000309923	0.0116544	ciliary rootlet coiled-coil, rootletin family member 2	protein coding gene	ENSMUSG00000084989
P35_CB	E030031F02Rik	old symbol	Tmem243	-1.09745	3.18014	1.28e-06	1.45e-05	transmembrane protein 243, mitochondrial	protein coding gene	ENSMUSG00000079659
P35_CB	E130309D14Rik	old symbol	Ccdc92b	0.304846	5.56784	0.00569418	0.0203062	coiled-coil domain containing 92B	protein coding gene	ENSMUSG00000069814
P35_CB	E230008O15Rik	current symbol	E230008O15Rik	-0.952948	4.43924	2.09e-10	5.03e-09	RIKEN cDNA E230008O15 gene	unclassified gene
P35_CB	E2f5	current symbol	E2f5	-0.579388	3.94297	0.00110961	0.00515322	E2F transcription factor 5	protein coding gene	ENSMUSG00000027552
P35_CB	E330009J07Rik	current symbol	E330009J07Rik	0.307001	5.53114	0.00592075	0.0209557	RIKEN cDNA E330009J07 gene	protein coding gene	ENSMUSG00000037172
P35_CB	E330033B04Rik	current symbol	E330033B04Rik	-1.35586	2.42847	4.61e-06	4.52e-05	RIKEN cDNA E330033B04 gene	lncRNA gene
P35_CB	E4f1	current symbol	E4f1	-0.504772	4.79565	0.000142402	0.000901347	E4F transcription factor 1	protein coding gene	ENSMUSG00000024137
P35_CB	E530001K10Rik	old symbol	Mir670hg	0.477367	3.59138	0.0172579	0.0499831	MIR670 host gene (non-protein coding)	lincRNA gene	ENSMUSG00000075020
P35_CB	Ebf3	current symbol	Ebf3	0.49942	4.0072	0.00438976	0.0163579	early B cell factor 3	protein coding gene	ENSMUSG00000010476
P35_CB	Ebf4	current symbol	Ebf4	-1.22055	2.39062	4.09e-05	0.000306954	early B cell factor 4	protein coding gene	ENSMUSG00000053552
P35_CB	Ebp	current symbol	Ebp	0.396926	4.95073	0.00176883	0.0076483	phenylalkylamine Ca2+ antagonist (emopamil) binding protein	protein coding gene	ENSMUSG00000031168
P35_CB	Ecd	current symbol	Ecd	0.436352	5.41262	0.000119922	0.000781815	ecdysoneless cell cycle regulator	protein coding gene	ENSMUSG00000021810
P35_CB	Echdc2	current symbol	Echdc2	-1.31939	4.18231	1.54e-15	7.91e-14	enoyl Coenzyme A hydratase domain containing 2	protein coding gene	ENSMUSG00000028601
P35_CB	Ecsit	current symbol	Ecsit	0.407462	5.55854	0.000190918	0.00115476	ECSIT signalling integrator	protein coding gene	ENSMUSG00000066839
P35_CB	Edc3	current symbol	Edc3	0.463235	5.23286	9.43e-05	0.000635796	enhancer of mRNA decapping 3	protein coding gene	ENSMUSG00000038957
P14_HC	Edc4	current symbol	Edc4	-0.408675	6.12825	0.000202781	0.00837438	enhancer of mRNA decapping 4	protein coding gene	ENSMUSG00000036270
P35_CB	Edem1	current symbol	Edem1	-0.3932	4.35811	0.0095556	0.031073	ER degradation enhancer, mannosidase alpha-like 1	protein coding gene	ENSMUSG00000030104
P35_CB	Edem2	current symbol	Edem2	-0.454325	4.57436	0.00140168	0.00629076	ER degradation enhancer, mannosidase alpha-like 2	protein coding gene	ENSMUSG00000038312
P35_CB	Edf1	current symbol	Edf1	0.4638	6.70057	1.86e-07	2.55e-06	endothelial differentiation-related factor 1	protein coding gene	ENSMUSG00000015092
P35_CB	Edil3	current symbol	Edil3	-0.266852	6.43431	0.00333723	0.0130112	EGF-like repeats and discoidin I-like domains 3	protein coding gene	ENSMUSG00000034488
P35_CB	Edn3	current symbol	Edn3	-1.41105	2.76613	1.53e-07	2.16e-06	endothelin 3	protein coding gene	ENSMUSG00000027524
P35_CB	Ednrb	current symbol	Ednrb	-0.26171	7.37002	0.00233176	0.00963726	endothelin receptor type B	protein coding gene	ENSMUSG00000022122
P35_CB	Eef1a2	current symbol	Eef1a2	0.860373	10.118	6.62e-18	4.27e-16	eukaryotic translation elongation factor 1 alpha 2	protein coding gene	ENSMUSG00000016349
P35_CB	Eef1b2	current symbol	Eef1b2	0.313919	6.7709	0.000354236	0.00197103	eukaryotic translation elongation factor 1 beta 2	protein coding gene	ENSMUSG00000025967
P35_CB	Eef1g	current symbol	Eef1g	0.329264	7.7943	0.000178134	0.00108867	eukaryotic translation elongation factor 1 gamma	protein coding gene	ENSMUSG00000071644
P35_CB	Eef2	current symbol	Eef2	0.377178	10.3308	0.000141152	0.000893884	eukaryotic translation elongation factor 2	protein coding gene	ENSMUSG00000034994
P35_CB	Efcab2	current symbol	Efcab2	-0.572855	3.9298	0.0012741	0.00579731	EF-hand calcium binding domain 2	protein coding gene	ENSMUSG00000026495
P35_CB	Efha2	old symbol	Micu3	-0.298348	7.21737	0.00050052	0.00265252	mitochondrial calcium uptake family, member 3	protein coding gene	ENSMUSG00000039478
P35_CB	Eftud2	current symbol	Eftud2	0.398384	6.79565	5.17e-06	5e-05	elongation factor Tu GTP binding domain containing 2	protein coding gene	ENSMUSG00000020929
P35_CB	Egfl7	current symbol	Egfl7	-0.965678	3.24926	1.67e-05	0.000140601	EGF-like domain 7	protein coding gene	ENSMUSG00000026921
P35_CB	Egfl8	current symbol	Egfl8	-0.994066	2.2346	0.00108551	0.00507624	EGF-like domain 8	protein coding gene	ENSMUSG00000015467
P35_CB	Egr1	current symbol	Egr1	0.620462	5.78061	1.79e-09	3.67e-08	early growth response 1	protein coding gene	ENSMUSG00000038418
P35_HC	Egr1	current symbol	Egr1	0.984574	7.64555	4.31e-12	2.98e-09	early growth response 1	protein coding gene	ENSMUSG00000038418
P35_HC	Egr2	current symbol	Egr2	1.5421	3.68018	1.71e-07	4.76e-05	early growth response 2	protein coding gene	ENSMUSG00000037868
P14_CB	Egr4	current symbol	Egr4	1.02806	2.32809	9.61e-06	0.00103646	early growth response 4	protein coding gene	ENSMUSG00000071341
P35_CB	Egr4	current symbol	Egr4	1.29857	4.0387	5.32e-14	2.22e-12	early growth response 4	protein coding gene	ENSMUSG00000071341
P35_CB	Ehd1	current symbol	Ehd1	0.567685	7.22482	2.68e-11	7.51e-10	EH-domain containing 1	protein coding gene	ENSMUSG00000024772
P35_CB	Ehd3	current symbol	Ehd3	0.524983	6.44623	1.07e-08	1.92e-07	EH-domain containing 3	protein coding gene	ENSMUSG00000024065
P35_CB	Ehmt1	current symbol	Ehmt1	0.332717	5.75458	0.00151109	0.00670345	euchromatic histone methyltransferase 1	protein coding gene	ENSMUSG00000036893
P35_CB	Eid1	current symbol	Eid1	-0.364038	7.59013	2.54e-05	0.000202181	EP300 interacting inhibitor of differentiation 1	protein coding gene	ENSMUSG00000091337
P35_CB	Eif1	current symbol	Eif1	0.423805	8.45311	3.64e-06	3.67e-05	eukaryotic translation initiation factor 1	protein coding gene	ENSMUSG00000035530
P35_CB	Eif1b	current symbol	Eif1b	0.256377	6.45381	0.00500994	0.0182749	eukaryotic translation initiation factor 1B	protein coding gene	ENSMUSG00000006941
P35_CB	Eif2ak1	current symbol	Eif2ak1	0.33818	6.18774	0.000454358	0.00244635	eukaryotic translation initiation factor 2 alpha kinase 1	protein coding gene	ENSMUSG00000029613
P35_CB	Eif2c1	old symbol	Ago1	0.20594	6.98156	0.0157864	0.0464193	argonaute RISC catalytic subunit 1	protein coding gene	ENSMUSG00000041530
P14_HC	Eif2c2	old symbol	Ago2	0.40186	5.96677	0.000333104	0.0122867	argonaute RISC catalytic subunit 2	protein coding gene	ENSMUSG00000036698
P35_CB	Eif2c2	old symbol	Ago2	0.388904	6.42911	3.26e-05	0.000251721	argonaute RISC catalytic subunit 2	protein coding gene	ENSMUSG00000036698
P35_HC	Eif2c2	old symbol	Ago2	-0.568863	5.82856	0.00065871	0.0488827	argonaute RISC catalytic subunit 2	protein coding gene	ENSMUSG00000036698
P35_CB	Eif2c3	old symbol	Ago3	-0.491828	4.75867	0.000221871	0.00131715	argonaute RISC catalytic subunit 3	protein coding gene	ENSMUSG00000028842
P35_CB	Eif2s2	current symbol	Eif2s2	-0.236069	6.1531	0.0146638	0.0436611	eukaryotic translation initiation factor 2, subunit 2 (beta)	protein coding gene	ENSMUSG00000074656
P14_HC	Eif2s3y	current symbol	Eif2s3y	-1.19817	6.22739	1.08e-27	2.99e-24	eukaryotic translation initiation factor 2, subunit 3, structural gene Y-linked	protein coding gene	ENSMUSG00000069049
P14_CB	Eif2s3y	current symbol	Eif2s3y	-1.08036	7.18063	2.52e-31	3.48e-28	eukaryotic translation initiation factor 2, subunit 3, structural gene Y-linked	protein coding gene	ENSMUSG00000069049
P35_CB	Eif2s3y	current symbol	Eif2s3y	-1.58666	5.40586	1.47e-40	3.49e-38	eukaryotic translation initiation factor 2, subunit 3, structural gene Y-linked	protein coding gene	ENSMUSG00000069049
P35_CB	Eif3b	current symbol	Eif3b	0.299205	6.41572	0.00124822	0.00569302	eukaryotic translation initiation factor 3, subunit B	protein coding gene	ENSMUSG00000056076
P35_CB	Eif3c	current symbol	Eif3c	0.48183	7.46792	2.53e-08	4.23e-07	eukaryotic translation initiation factor 3, subunit C	protein coding gene	ENSMUSG00000030738
P35_CB	Eif3d	current symbol	Eif3d	0.381009	6.2453	6.54e-05	0.000461442	eukaryotic translation initiation factor 3, subunit D	protein coding gene	ENSMUSG00000016554
P35_CB	Eif3h	current symbol	Eif3h	0.31993	6.88323	0.000225599	0.00133797	eukaryotic translation initiation factor 3, subunit H	protein coding gene	ENSMUSG00000022312
P35_CB	Eif3i	current symbol	Eif3i	0.338891	6.22111	0.000351428	0.00196026	eukaryotic translation initiation factor 3, subunit I	protein coding gene	ENSMUSG00000028798
P35_CB	Eif3j	old symbol	Eif3j1	-0.43553	4.77175	0.00103381	0.00487851	eukaryotic translation initiation factor 3, subunit J1	protein coding gene	ENSMUSG00000027236
P35_CB	Eif4a3	current symbol	Eif4a3	0.541175	5.90515	9.91e-08	1.47e-06	eukaryotic translation initiation factor 4A3	protein coding gene	ENSMUSG00000025580
P35_CB	Eif4e2	current symbol	Eif4e2	0.290404	5.80381	0.00526607	0.0190137	eukaryotic translation initiation factor 4E member 2	protein coding gene	ENSMUSG00000026254
P35_CB	Eif4ebp2	current symbol	Eif4ebp2	0.360787	5.19605	0.00219612	0.00918649	eukaryotic translation initiation factor 4E binding protein 2	protein coding gene	ENSMUSG00000020091
P14_HC	Eif4ebp3	current symbol	Eif4ebp3	-0.896751	2.24369	0.000769615	0.0226734	eukaryotic translation initiation factor 4E binding protein 3	protein coding gene	ENSMUSG00000090264
P35_CB	Eif4ebp3	current symbol	Eif4ebp3	-1.46346	2.5526	2.91e-07	3.85e-06	eukaryotic translation initiation factor 4E binding protein 3	protein coding gene	ENSMUSG00000090264
P35_CB	Eif4g1	current symbol	Eif4g1	0.294692	8.3101	0.0011393	0.00526751	eukaryotic translation initiation factor 4, gamma 1	protein coding gene	ENSMUSG00000045983
P35_CB	Eif4h	current symbol	Eif4h	0.235605	8.6857	0.0111658	0.0352051	eukaryotic translation initiation factor 4H	protein coding gene	ENSMUSG00000040731
P35_CB	Eif5	current symbol	Eif5	-0.490782	8.35802	6.64e-08	1.02e-06	eukaryotic translation initiation factor 5	protein coding gene	ENSMUSG00000021282
P35_CB	Eif5a	current symbol	Eif5a	0.324259	7.96392	0.000245232	0.00143686	eukaryotic translation initiation factor 5A	protein coding gene	ENSMUSG00000078812
P35_CB	Eif5a2	current symbol	Eif5a2	-0.288189	6.10978	0.00308127	0.0121538	eukaryotic translation initiation factor 5A2	protein coding gene	ENSMUSG00000050192
P35_CB	Eif6	current symbol	Eif6	0.344475	5.61995	0.00151658	0.00672362	eukaryotic translation initiation factor 6	protein coding gene	ENSMUSG00000027613
P35_CB	Elavl1	current symbol	Elavl1	0.345358	6.36108	0.000221255	0.00131466	ELAV (embryonic lethal, abnormal vision)-like 1 (Hu antigen R)	protein coding gene	ENSMUSG00000040028
P35_CB	Elavl3	current symbol	Elavl3	0.294462	8.71669	0.00153864	0.00680353	ELAV like RNA binding protein 3	protein coding gene	ENSMUSG00000003410
P35_HC	Elfn1	current symbol	Elfn1	-0.822897	4.49254	0.000254965	0.0244395	leucine rich repeat and fibronectin type III, extracellular 1	protein coding gene	ENSMUSG00000048988
P35_CB	Elk1	current symbol	Elk1	-0.245089	6.1689	0.0109897	0.0347474	ELK1, member of ETS oncogene family	protein coding gene	ENSMUSG00000009406
P35_CB	Elk3	current symbol	Elk3	-0.728511	2.77537	0.00491669	0.0180176	ELK3, member of ETS oncogene family	protein coding gene	ENSMUSG00000008398
P35_CB	Ell	current symbol	Ell	-0.318909	4.88248	0.0151655	0.0448971	elongation factor RNA polymerase II	protein coding gene	ENSMUSG00000070002
P35_CB	Elmo1	current symbol	Elmo1	0.330079	7.59848	0.000134092	0.000860052	engulfment and cell motility 1	protein coding gene	ENSMUSG00000041112
P35_CB	Elmo3	current symbol	Elmo3	-0.933646	3.36727	1.57e-05	0.000133376	engulfment and cell motility 3	protein coding gene	ENSMUSG00000014791
P35_CB	Elmod2	current symbol	Elmod2	-0.548424	4.69732	6.8e-05	0.000478236	ELMO/CED-12 domain containing 2	protein coding gene	ENSMUSG00000035151
P14_HC	Eln	current symbol	Eln	-0.469805	6.13538	1.95e-05	0.00127416	elastin	protein coding gene	ENSMUSG00000029675
P14_CB	Eln	current symbol	Eln	-0.457273	4.71044	8.76e-05	0.00642804	elastin	protein coding gene	ENSMUSG00000029675
P35_CB	Eln	current symbol	Eln	-1.22369	3.4478	9.49e-09	1.72e-07	elastin	protein coding gene	ENSMUSG00000029675
P35_CB	Elof1	current symbol	Elof1	0.309987	5.14025	0.0105876	0.0337931	ELF1 homolog, elongation factor 1	protein coding gene	ENSMUSG00000013822
P35_CB	Elovl2	current symbol	Elovl2	-0.268109	5.68302	0.0115788	0.0362698	elongation of very long chain fatty acids (FEN1/Elo2, SUR4/Elo3, yeast)-like 2	protein coding gene	ENSMUSG00000021364
P14_HC	Elovl6	current symbol	Elovl6	0.446719	6.66563	2.63e-05	0.00165202	ELOVL family member 6, elongation of long chain fatty acids (yeast)	protein coding gene	ENSMUSG00000041220
P35_CB	Elovl6	current symbol	Elovl6	0.316775	6.67149	0.000392099	0.00215503	ELOVL family member 6, elongation of long chain fatty acids (yeast)	protein coding gene	ENSMUSG00000041220
P14_HC	Elovl7	current symbol	Elovl7	0.64015	4.318	5.13e-05	0.0028463	ELOVL family member 7, elongation of long chain fatty acids (yeast)	protein coding gene	ENSMUSG00000021696
P35_CB	Elovl7	current symbol	Elovl7	-0.515651	4.97393	5.11e-05	0.000372179	ELOVL family member 7, elongation of long chain fatty acids (yeast)	protein coding gene	ENSMUSG00000021696
P35_CB	Elp3	current symbol	Elp3	0.26277	6.35086	0.00494661	0.0181076	elongator acetyltransferase complex subunit 3	protein coding gene	ENSMUSG00000022031
P35_CB	Eltd1	old symbol	Adgrl4	-1.20648	4.13615	6.05e-13	2.16e-11	adhesion G protein-coupled receptor L4	protein coding gene	ENSMUSG00000039167
P35_CB	Emcn	current symbol	Emcn	-0.92543	2.07576	0.00417073	0.0157022	endomucin	protein coding gene	ENSMUSG00000054690
P35_CB	Emd	current symbol	Emd	0.49593	5.0846	5.82e-05	0.000417979	emerin	protein coding gene	ENSMUSG00000001964
P14_HC	Eml5	current symbol	Eml5	-0.326311	6.76802	0.0019957	0.0467775	echinoderm microtubule associated protein like 5	protein coding gene	ENSMUSG00000051166
P35_CB	Eml5	current symbol	Eml5	-0.907749	7.47241	9.53e-26	1.03e-23	echinoderm microtubule associated protein like 5	protein coding gene	ENSMUSG00000051166
P35_CB	Eml6	current symbol	Eml6	-0.80794	5.20793	2.45e-11	6.95e-10	echinoderm microtubule associated protein like 6	protein coding gene	ENSMUSG00000044072
P35_HC	Eml6	current symbol	Eml6	-0.65931	5.34888	0.000309469	0.0281026	echinoderm microtubule associated protein like 6	protein coding gene	ENSMUSG00000044072
P35_CB	Emp1	current symbol	Emp1	-1.44786	1.56906	0.000181417	0.00110612	epithelial membrane protein 1	protein coding gene	ENSMUSG00000030208
P35_CB	Emp2	current symbol	Emp2	-0.630233	5.29363	9.43e-08	1.41e-06	epithelial membrane protein 2	protein coding gene	ENSMUSG00000022505
P35_CB	Enc1	current symbol	Enc1	0.718363	3.66533	0.000284395	0.00163227	ectodermal-neural cortex 1	protein coding gene	ENSMUSG00000041773
P35_CB	Endod1	current symbol	Endod1	0.222114	6.95217	0.0101491	0.0326487	endonuclease domain containing 1	protein coding gene	ENSMUSG00000037419
P35_CB	Eng	current symbol	Eng	-0.745181	4.0115	1.43e-05	0.000121858	endoglin	protein coding gene	ENSMUSG00000026814
P35_CB	Eno1	current symbol	Eno1	0.415262	8.95585	1.23e-05	0.000107424	enolase 1, alpha non-neuron	protein coding gene	ENSMUSG00000063524
P35_CB	Eno2	current symbol	Eno2	0.5604	9.88434	1.79e-08	3.09e-07	enolase 2, gamma neuronal	protein coding gene	ENSMUSG00000004267
P35_CB	Eno3	current symbol	Eno3	-0.707619	3.41512	0.000722357	0.00361916	enolase 3, beta muscle	protein coding gene	ENSMUSG00000060600
P35_CB	Enpep	current symbol	Enpep	-1.35381	1.27217	0.00190445	0.00814587	glutamyl aminopeptidase	protein coding gene	ENSMUSG00000028024
P35_CB	Enpp1	current symbol	Enpp1	-0.878439	3.05818	0.000258007	0.00149998	ectonucleotide pyrophosphatase/phosphodiesterase 1	protein coding gene	ENSMUSG00000037370
P14_HC	Enpp2	current symbol	Enpp2	0.841931	8.12795	3.51e-14	2.22e-11	ectonucleotide pyrophosphatase/phosphodiesterase 2	protein coding gene	ENSMUSG00000022425
P35_CB	Enpp2	current symbol	Enpp2	-1.37123	9.00191	1.18e-45	3.17e-43	ectonucleotide pyrophosphatase/phosphodiesterase 2	protein coding gene	ENSMUSG00000022425
P35_HC	Enpp2	current symbol	Enpp2	1.4052	8.58164	1.41e-22	2.43e-19	ectonucleotide pyrophosphatase/phosphodiesterase 2	protein coding gene	ENSMUSG00000022425
P35_CB	Enpp4	current symbol	Enpp4	-0.519122	4.79671	8.74e-05	0.000593589	ectonucleotide pyrophosphatase/phosphodiesterase 4	protein coding gene	ENSMUSG00000023961
P14_HC	Enpp6	current symbol	Enpp6	0.608812	4.63524	3.06e-05	0.0018708	ectonucleotide pyrophosphatase/phosphodiesterase 6	protein coding gene	ENSMUSG00000038173
P35_CB	ENSMUSG00000074747	old symbol	Atxn7l3b	0.224094	8.09617	0.0122798	0.0378848	ataxin 7-like 3B	protein coding gene	ENSMUSG00000074748
P35_CB	Entpd1	current symbol	Entpd1	-0.967833	2.85962	0.000128818	0.000830967	ectonucleoside triphosphate diphosphohydrolase 1	protein coding gene	ENSMUSG00000048120
P14_HC	Entpd4	current symbol	Entpd4	0.33355	7.06642	0.00148349	0.0374272	ectonucleoside triphosphate diphosphohydrolase 4	protein coding gene	ENSMUSG00000095463
P14_CB	Entpd4	current symbol	Entpd4	0.312471	6.36943	0.000644919	0.0336587	ectonucleoside triphosphate diphosphohydrolase 4	protein coding gene	ENSMUSG00000095463
P35_CB	Entpd4	current symbol	Entpd4	0.433751	6.85972	5.63e-07	6.97e-06	ectonucleoside triphosphate diphosphohydrolase 4	protein coding gene	ENSMUSG00000095463
P35_CB	Eny2	current symbol	Eny2	-0.540135	5.62822	6.11e-07	7.49e-06	ENY2 transcription and export complex 2 subunit	protein coding gene	ENSMUSG00000022338
P14_CB	Eomes	current symbol	Eomes	0.473011	4.82128	3.37e-05	0.00296532	eomesodermin	protein coding gene	ENSMUSG00000032446
P35_CB	Eomes	current symbol	Eomes	1.48007	4.71538	9.25e-25	9.45e-23	eomesodermin	protein coding gene	ENSMUSG00000032446
P35_CB	Ep300	current symbol	Ep300	0.290383	7.01877	0.000713713	0.00358639	E1A binding protein p300	protein coding gene	ENSMUSG00000055024
P35_CB	Ep400	current symbol	Ep400	0.279018	6.99486	0.00118012	0.0054283	E1A binding protein p400	protein coding gene	ENSMUSG00000029505
P14_CB	Epas1	current symbol	Epas1	-0.35946	6.80837	6.83e-05	0.00529182	endothelial PAS domain protein 1	protein coding gene	ENSMUSG00000024140
P35_CB	Epb4.1l2	old symbol	Epb41l2	-0.297231	5.55433	0.00589207	0.020877	erythrocyte membrane protein band 4.1 like 2	protein coding gene	ENSMUSG00000019978
P35_CB	Epb4.9	old symbol	Dmtn	0.374154	6.39393	4.96e-05	0.000362775	dematin actin binding protein	protein coding gene	ENSMUSG00000022099
P35_CB	Epha1	current symbol	Epha1	-1.04922	1.99669	0.00179624	0.00775188	Eph receptor A1	protein coding gene	ENSMUSG00000029859
P14_HC	Epha5	current symbol	Epha5	0.352034	7.22052	0.000840619	0.0243009	Eph receptor A5	protein coding gene	ENSMUSG00000029245
P14_HC	Epha6	current symbol	Epha6	0.599426	5.7124	2.92e-07	3.85e-05	Eph receptor A6	protein coding gene	ENSMUSG00000055540
P35_HC	Epha6	current symbol	Epha6	-1.00675	5.77234	3.86e-09	1.48e-06	Eph receptor A6	protein coding gene	ENSMUSG00000055540
P35_CB	Epha8	current symbol	Epha8	-0.612438	6.25676	1.41e-10	3.55e-09	Eph receptor A8	protein coding gene	ENSMUSG00000028661
P35_CB	Ephb6	current symbol	Ephb6	0.66639	3.58256	0.00080213	0.00394972	Eph receptor B6	protein coding gene	ENSMUSG00000029869
P35_HC	Ephb6	current symbol	Ephb6	0.606419	6.44712	5.29e-05	0.00709831	Eph receptor B6	protein coding gene	ENSMUSG00000029869
P35_CB	Epn1	current symbol	Epn1	0.278525	7.95161	0.00164737	0.0072063	epsin 1	protein coding gene	ENSMUSG00000035203
P35_CB	Epn2	current symbol	Epn2	0.209381	7.50169	0.0152144	0.0449925	epsin 2	protein coding gene	ENSMUSG00000001036
P35_CB	Epn3	current symbol	Epn3	-1.54227	4.49969	2.96e-24	2.95e-22	epsin 3	protein coding gene	ENSMUSG00000010080
P35_CB	Eprs	current symbol	Eprs	0.239157	7.09795	0.00530771	0.0191384	glutamyl-prolyl-tRNA synthetase	protein coding gene	ENSMUSG00000026615
P35_CB	Eps8	current symbol	Eps8	0.407756	7.38441	1.72e-06	1.89e-05	epidermal growth factor receptor pathway substrate 8	protein coding gene	ENSMUSG00000015766
P35_CB	Eps8l1	current symbol	Eps8l1	0.819625	2.1475	0.0128556	0.0392568	EPS8-like 1	protein coding gene	ENSMUSG00000006154
P35_CB	Eps8l2	current symbol	Eps8l2	0.290595	5.69645	0.00539305	0.0193995	EPS8-like 2	protein coding gene	ENSMUSG00000025504
P35_CB	Erbb2ip	old symbol	Erbin	-0.585139	6.27133	6.52e-10	1.43e-08	Erbb2 interacting protein	protein coding gene	ENSMUSG00000021709
P14_HC	Erbb3	current symbol	Erbb3	0.972455	2.97416	1.85e-05	0.00122556	erb-b2 receptor tyrosine kinase 3	protein coding gene	ENSMUSG00000018166
P35_CB	Erbb4	current symbol	Erbb4	0.478502	3.91218	0.00776637	0.026229	erb-b2 receptor tyrosine kinase 4	protein coding gene	ENSMUSG00000062209
P35_HC	Erbb4	current symbol	Erbb4	-1.06745	3.72949	0.000201836	0.0207907	erb-b2 receptor tyrosine kinase 4	protein coding gene	ENSMUSG00000062209
P35_CB	Erc1	current symbol	Erc1	0.648742	7.66542	1.04e-13	4.15e-12	ELKS/RAB6-interacting/CAST family member 1	protein coding gene	ENSMUSG00000030172
P35_CB	Ercc2	current symbol	Ercc2	-0.504437	5.01028	5.67e-05	0.000407748	excision repair cross-complementing rodent repair deficiency, complementation group 2	protein coding gene	ENSMUSG00000030400
P35_CB	Ergic2	current symbol	Ergic2	-0.596197	5.91492	3.86e-09	7.48e-08	ERGIC and golgi 2	protein coding gene	ENSMUSG00000030304
P35_CB	Eri2	current symbol	Eri2	-0.822452	3.19855	0.000319283	0.00180334	exoribonuclease 2	protein coding gene	ENSMUSG00000030929
P35_CB	Eri3	current symbol	Eri3	0.330765	6.11405	0.000582698	0.00301571	exoribonuclease 3	protein coding gene	ENSMUSG00000033423
P35_CB	Erlec1	current symbol	Erlec1	-0.482639	5.66941	5.92e-06	5.62e-05	endoplasmic reticulum lectin 1	protein coding gene	ENSMUSG00000020311
P14_HC	Ermn	current symbol	Ermn	0.927269	4.22489	1.33e-08	2.49e-06	ermin, ERM-like protein	protein coding gene	ENSMUSG00000026830
P35_CB	Ermn	current symbol	Ermn	-0.510953	6.47363	2.22e-08	3.75e-07	ermin, ERM-like protein	protein coding gene	ENSMUSG00000026830
P35_CB	Ern1	current symbol	Ern1	-0.580479	3.51327	0.00462621	0.0171207	endoplasmic reticulum (ER) to nucleus signalling 1	protein coding gene	ENSMUSG00000020715
P35_CB	Ero1l	current symbol	Ero1l	-0.32629	5.02337	0.0087906	0.0289484	ERO1-like (S. cerevisiae)	protein coding gene	ENSMUSG00000021831
P35_CB	Errfi1	current symbol	Errfi1	0.291248	5.74119	0.0063206	0.0221509	ERBB receptor feedback inhibitor 1	protein coding gene	ENSMUSG00000028967
P35_CB	Esam	current symbol	Esam	-0.803387	3.24811	0.000257563	0.00149807	endothelial cell-specific adhesion molecule	protein coding gene	ENSMUSG00000001946
P35_CB	Esco1	current symbol	Esco1	-0.562067	5.28447	1.86e-06	2.02e-05	establishment of sister chromatid cohesion N-acetyltransferase 1	protein coding gene	ENSMUSG00000024293
P35_CB	Esf1	current symbol	Esf1	-0.318034	5.26723	0.00724985	0.0247763	ESF1 nucleolar pre-rRNA processing protein homolog	protein coding gene	ENSMUSG00000045624
P35_CB	Esrrb	current symbol	Esrrb	0.607713	3.9349	0.000563573	0.00292685	estrogen related receptor, beta	protein coding gene	ENSMUSG00000021255
P35_CB	Esrrg	current symbol	Esrrg	-0.29555	6.69404	0.000826911	0.00404955	estrogen-related receptor gamma	protein coding gene	ENSMUSG00000026610
P35_CB	Esyt2	current symbol	Esyt2	-0.502563	5.97671	5.46e-07	6.8e-06	extended synaptotagmin-like protein 2	protein coding gene	ENSMUSG00000021171
P35_CB	Etaa1	current symbol	Etaa1	-0.433114	4.33815	0.00457862	0.0169632	Ewing tumor-associated antigen 1	protein coding gene	ENSMUSG00000016984
P14_CB	Etfa	current symbol	Etfa	-0.31911	5.95074	0.000769165	0.0385981	electron transferring flavoprotein, alpha polypeptide	protein coding gene	ENSMUSG00000032314
P35_CB	Etl4	current symbol	Etl4	0.294004	5.60397	0.00602119	0.0212663	enhancer trap locus 4	protein coding gene	ENSMUSG00000036617
P35_CB	Etohi1	old symbol	Zfp971	-0.868897	5.18715	8.39e-13	2.93e-11	zinc finger protein 971	protein coding gene	ENSMUSG00000074519
P35_CB	Ets1	current symbol	Ets1	-0.813229	3.22861	0.000267269	0.00154649	E26 avian leukemia oncogene 1, 5' domain	protein coding gene	ENSMUSG00000032035
P35_CB	Ets2	current symbol	Ets2	0.645294	6.87743	1.01e-13	4.04e-12	E26 avian leukemia oncogene 2, 3' domain	protein coding gene	ENSMUSG00000022895
P35_CB	Etv1	current symbol	Etv1	0.247945	8.57398	0.00731527	0.024943	ets variant 1	protein coding gene	ENSMUSG00000004151
P35_CB	Etv5	current symbol	Etv5	0.628954	6.30605	3.86e-11	1.05e-09	ets variant 5	protein coding gene	ENSMUSG00000013089
P35_CB	Etv6	current symbol	Etv6	0.446314	4.57165	0.00176183	0.00762536	ets variant 6	protein coding gene	ENSMUSG00000030199
P14_HC	Evc2	current symbol	Evc2	-0.554757	4.03638	0.00113967	0.0305292	EvC ciliary complex subunit 2	protein coding gene	ENSMUSG00000050248
P35_CB	Evi2a	current symbol	Evi2a	-0.342218	4.59774	0.0136354	0.0411167	ecotropic viral integration site 2a	protein coding gene	ENSMUSG00000078771
P35_CB	Evi5	current symbol	Evi5	-0.585885	5.99664	3.9e-09	7.54e-08	ecotropic viral integration site 5	protein coding gene	ENSMUSG00000011831
P35_CB	Ewsr1	current symbol	Ewsr1	-0.280503	7.49516	0.00111866	0.00518808	Ewing sarcoma breakpoint region 1	protein coding gene	ENSMUSG00000009079
P35_CB	Exd2	current symbol	Exd2	-0.349052	5.80405	0.000681576	0.00344286	exonuclease 3'-5' domain containing 2	protein coding gene	ENSMUSG00000032705
P35_CB	Exoc3	current symbol	Exoc3	0.372719	6.65297	3.67e-05	0.000280454	exocyst complex component 3	protein coding gene	ENSMUSG00000034152
P35_CB	Exoc4	current symbol	Exoc4	0.397706	5.95241	8.41e-05	0.000573494	exocyst complex component 4	protein coding gene	ENSMUSG00000029763
P35_CB	Exoc5	current symbol	Exoc5	-0.531492	6.00696	9.23e-08	1.38e-06	exocyst complex component 5	protein coding gene	ENSMUSG00000061244
P35_CB	Exoc7	current symbol	Exoc7	0.333407	6.24585	0.000455998	0.00245028	exocyst complex component 7	protein coding gene	ENSMUSG00000020792
P35_CB	Exoc8	current symbol	Exoc8	0.41063	5.44835	0.000249296	0.00145498	exocyst complex component 8	protein coding gene	ENSMUSG00000074030
P35_CB	Exog	current symbol	Exog	0.560159	4.29044	0.000395511	0.00217112	endo/exonuclease (5'-3'), endonuclease G-like	protein coding gene	ENSMUSG00000042787
P35_CB	Exosc8	current symbol	Exosc8	-0.465325	3.65212	0.016843	0.0490659	exosome component 8	protein coding gene	ENSMUSG00000027752
P14_HC	Exosc9	current symbol	Exosc9	-0.629435	4.6631	1.26e-05	0.000903516	exosome component 9	protein coding gene	ENSMUSG00000027714
P14_CB	Exosc9	current symbol	Exosc9	-0.68428	4.68944	7.15e-09	1.54e-06	exosome component 9	protein coding gene	ENSMUSG00000027714
P35_CB	Exosc9	current symbol	Exosc9	-0.354151	4.67171	0.0101713	0.0326886	exosome component 9	protein coding gene	ENSMUSG00000027714
P35_CB	Exph5	current symbol	Exph5	0.28107	7.92018	0.00144881	0.00646562	exophilin 5	protein coding gene	ENSMUSG00000034584
P35_CB	Ext2	current symbol	Ext2	0.37644	5.50408	0.000665351	0.00337482	exostoses (multiple) 2	protein coding gene	ENSMUSG00000027198
P14_CB	Extl1	current symbol	Extl1	-1.09528	2.24902	2.54e-06	0.00032713	exostoses (multiple)-like 1	protein coding gene	ENSMUSG00000028838
P35_CB	Extl1	current symbol	Extl1	-0.538941	3.41806	0.00964895	0.0313236	exostoses (multiple)-like 1	protein coding gene	ENSMUSG00000028838
P35_CB	Ezh1	current symbol	Ezh1	0.317366	6.50097	0.000612218	0.00314076	enhancer of zeste 1 polycomb repressive complex 2 subunit	protein coding gene	ENSMUSG00000006920
P14_HC	Ezr	current symbol	Ezr	-0.499191	6.61676	2.72e-06	0.000261605	ezrin	protein coding gene	ENSMUSG00000052397
P35_CB	F2r	current symbol	F2r	0.902093	4.25505	1.45e-08	2.54e-07	coagulation factor II (thrombin) receptor	protein coding gene	ENSMUSG00000048376
P35_CB	F5	current symbol	F5	-1.28821	2.63011	2.02e-06	2.19e-05	coagulation factor V	protein coding gene	ENSMUSG00000026579
P35_HC	F5	current symbol	F5	1.72891	2.50266	4.06e-05	0.00583674	coagulation factor V	protein coding gene	ENSMUSG00000026579
P35_CB	F8a	current symbol	F8a	0.51561	4.49957	0.000510475	0.0026968	factor 8-associated gene A	protein coding gene	ENSMUSG00000078317
P14_HC	Fa2h	current symbol	Fa2h	0.614196	5.06143	3.11e-06	0.000287837	fatty acid 2-hydroxylase	protein coding gene	ENSMUSG00000033579
P14_CB	Fa2h	current symbol	Fa2h	-0.363711	6.06621	0.00010886	0.00770393	fatty acid 2-hydroxylase	protein coding gene	ENSMUSG00000033579
P35_CB	Fabp7	current symbol	Fabp7	-0.262726	5.93879	0.0104729	0.0334901	fatty acid binding protein 7, brain	protein coding gene	ENSMUSG00000019874
P35_CB	Faim2	current symbol	Faim2	0.520438	8.90643	3.77e-08	6.09e-07	Fas apoptotic inhibitory molecule 2	protein coding gene	ENSMUSG00000023011
P35_CB	Fam100a	old symbol	Ubald1	0.37998	6.1761	8.59e-05	0.000584822	UBA-like domain containing 1	protein coding gene	ENSMUSG00000039568
P35_CB	Fam101b	old symbol	Rflnb	0.288459	5.44172	0.0100158	0.0323201	refilin B	protein coding gene	ENSMUSG00000020846
P14_HC	Fam107a	current symbol	Fam107a	-0.540637	8.55061	1.83e-06	0.000188053	family with sequence similarity 107, member A	protein coding gene	ENSMUSG00000021750
P14_CB	Fam107a	current symbol	Fam107a	-0.809021	9.89244	2.64e-13	1.1e-10	family with sequence similarity 107, member A	protein coding gene	ENSMUSG00000021750
P35_CB	Fam108b	old symbol	Abhd17b	-0.399287	6.13543	3.46e-05	0.000265828	abhydrolase domain containing 17B	protein coding gene	ENSMUSG00000047368
P35_CB	Fam110b	current symbol	Fam110b	0.616557	4.69892	7.24e-06	6.74e-05	family with sequence similarity 110, member B	protein coding gene	ENSMUSG00000049119
P14_HC	Fam116b	old symbol	Dennd6b	-0.726623	5.71602	4.39e-10	1.15e-07	DENN/MADD domain containing 6B	protein coding gene	ENSMUSG00000015377
P35_CB	Fam116b	old symbol	Dennd6b	-1.62112	6.6961	2.25e-71	2.02e-68	DENN/MADD domain containing 6B	protein coding gene	ENSMUSG00000015377
P35_CB	Fam117b	current symbol	Fam117b	0.413324	6.78994	2.43e-06	2.58e-05	family with sequence similarity 117, member B	protein coding gene	ENSMUSG00000041040
P35_CB	Fam123a	old symbol	Amer2	0.466255	5.74243	9.54e-06	8.55e-05	APC membrane recruitment 2	protein coding gene	ENSMUSG00000021986
P14_HC	Fam123c	old symbol	Amer3	-0.380339	5.83099	0.000871301	0.024926	APC membrane recruitment 3	protein coding gene	ENSMUSG00000045174
P35_CB	Fam123c	old symbol	Amer3	0.402357	6.26809	2e-05	0.000163673	APC membrane recruitment 3	protein coding gene	ENSMUSG00000045174
P35_CB	Fam126b	current symbol	Fam126b	-0.27868	7.22048	0.00104921	0.00493561	family with sequence similarity 126, member B	protein coding gene	ENSMUSG00000038174
P35_CB	Fam131a	current symbol	Fam131a	0.291171	6.76703	0.000925019	0.00444603	family with sequence similarity 131, member A	protein coding gene	ENSMUSG00000050821
P35_CB	Fam134a	old symbol	Retreg2	0.254685	7.96283	0.00393754	0.0149538	reticulophagy regulator family member 2	protein coding gene	ENSMUSG00000049339
P35_CB	Fam135a	current symbol	Fam135a	-1.01073	6.20205	1.23e-25	1.3e-23	family with sequence similarity 135, member A	protein coding gene	ENSMUSG00000026153
P35_CB	Fam135b	current symbol	Fam135b	0.574962	5.00738	7.1e-06	6.64e-05	family with sequence similarity 135, member B	protein coding gene	ENSMUSG00000036800
P35_HC	Fam135b	current symbol	Fam135b	-0.790049	4.50527	0.000605223	0.0463339	family with sequence similarity 135, member B	protein coding gene	ENSMUSG00000036800
P35_CB	Fam13a	current symbol	Fam13a	0.27872	6.48652	0.00232824	0.0096257	family with sequence similarity 13, member A	protein coding gene	ENSMUSG00000037709
P14_HC	Fam151a	current symbol	Fam151a	-0.619052	4.19063	0.000146733	0.00644325	family with sequence simliarity 151, member A	protein coding gene	ENSMUSG00000034871
P35_CB	Fam151a	current symbol	Fam151a	0.37627	4.63322	0.00791466	0.0266564	family with sequence simliarity 151, member A	protein coding gene	ENSMUSG00000034871
P14_HC	Fam160a1	current symbol	Fam160a1	-1.06638	2.9737	2.07e-06	0.000208449	family with sequence similarity 160, member A1	protein coding gene	ENSMUSG00000051000
P35_CB	Fam161a	current symbol	Fam161a	-1.08702	1.7407	0.00303829	0.0120089	family with sequence similarity 161, member A	protein coding gene	ENSMUSG00000049811
P14_HC	Fam163b	current symbol	Fam163b	-0.430164	6.44352	6.02e-05	0.00323553	family with sequence similarity 163, member B	protein coding gene	ENSMUSG00000009216
P35_CB	Fam163b	current symbol	Fam163b	0.879425	1.99244	0.00938495	0.0305918	family with sequence similarity 163, member B	protein coding gene	ENSMUSG00000009216
P35_CB	Fam168b	current symbol	Fam168b	0.291003	8.85336	0.00198427	0.0084258	family with sequence similarity 168, member B	protein coding gene	ENSMUSG00000037503
P14_HC	Fam171b	current symbol	Fam171b	0.390185	7.34542	0.00023014	0.00942011	family with sequence similarity 171, member B	protein coding gene	ENSMUSG00000048388
P35_CB	Fam172a	current symbol	Fam172a	-0.26455	5.53774	0.0162752	0.0476694	family with sequence similarity 172, member A	protein coding gene	ENSMUSG00000064138
P35_CB	Fam173a	current symbol	Fam173a	-0.255753	5.80117	0.0140023	0.0419813	family with sequence similarity 173, member A	protein coding gene	ENSMUSG00000057411
P35_CB	Fam175a	old symbol	Abraxas1	-0.905076	2.72551	0.000688213	0.00346859	BRCA1 A complex subunit	protein coding gene	ENSMUSG00000035234
P14_CB	Fam176a	old symbol	Eva1a	-0.630077	3.77788	1.45e-05	0.00147183	eva-1 homolog A (C. elegans)	protein coding gene	ENSMUSG00000035104
P35_CB	Fam178a	old symbol	Slf2	-0.558538	6.4975	9.47e-10	2.02e-08	SMC5-SMC6 complex localization factor 2	protein coding gene	ENSMUSG00000036097
P35_CB	Fam189a2	current symbol	Fam189a2	-0.904398	3.20452	7.9e-05	0.000543693	family with sequence similarity 189, member A2	protein coding gene	ENSMUSG00000071604
P35_CB	Fam193a	current symbol	Fam193a	0.391154	5.92823	0.000112564	0.000743918	family with sequence homology 193, member A	protein coding gene	ENSMUSG00000037210
P35_CB	Fam193b	current symbol	Fam193b	-0.856616	6.11264	1.36e-18	9.46e-17	family with sequence similarity 193, member B	protein coding gene	ENSMUSG00000021495
P35_CB	Fam20c	current symbol	Fam20c	0.350068	4.90079	0.00723076	0.0247424	family with sequence similarity 20, member C	protein coding gene	ENSMUSG00000025854
P35_CB	Fam33a	old symbol	Ska2	-0.519192	3.45189	0.0116717	0.0364675	spindle and kinetochore associated complex subunit 2	protein coding gene	ENSMUSG00000020492
P35_CB	Fam36a	old symbol	Cox20	-1.19314	5.38762	2.64e-24	2.66e-22	cytochrome c oxidase assembly protein 20	protein coding gene	ENSMUSG00000026500
P35_CB	Fam38a	old symbol	Piezo1	-1.10948	2.35471	0.000217814	0.00129593	piezo-type mechanosensitive ion channel component 1	protein coding gene	ENSMUSG00000014444
P35_CB	Fam38b	old symbol	Piezo2	-1.71669	1.05143	0.000367901	0.0020353	piezo-type mechanosensitive ion channel component 2	protein coding gene	ENSMUSG00000041482
P35_CB	Fam45a	current symbol	Fam45a	-0.337078	5.46983	0.00255915	0.0104022	family with sequence similarity 45, member A	protein coding gene	ENSMUSG00000024993
P35_CB	Fam48a	old symbol	Supt20	-0.736691	4.82336	3.18e-08	5.21e-07	suppressor of Ty 20	protein coding gene	ENSMUSG00000027751
P35_CB	Fam49b	current symbol	Fam49b	-0.212986	7.28426	0.0123786	0.0381109	family with sequence similarity 49, member B	protein coding gene	ENSMUSG00000022378
P35_CB	Fam53b	current symbol	Fam53b	0.427611	6.34939	4.74e-06	4.64e-05	family with sequence similarity 53, member B	protein coding gene	ENSMUSG00000030956
P14_HC	Fam55d	old symbol	Nxpe4	0.636445	3.33359	0.00188892	0.0446518	neurexophilin and PC-esterase domain family, member 4	protein coding gene	ENSMUSG00000044229
P35_CB	Fam57b	current symbol	Fam57b	0.24536	7.22599	0.00375577	0.0143809	family with sequence similarity 57, member B	protein coding gene	ENSMUSG00000058966
P35_CB	Fam63a	old symbol	Mindy1	0.218424	6.73062	0.013035	0.0397238	MINDY lysine 48 deubiquitinase 1	protein coding gene	ENSMUSG00000038712
P35_CB	Fam65a	old symbol	Ripor1	0.30955	5.91703	0.00217612	0.00911414	RHO family interacting cell polarization regulator 1	protein coding gene	ENSMUSG00000038604
P35_CB	Fam69a	old symbol	Dipk1a	-0.259181	6.08897	0.00823157	0.0275107	divergent protein kinase domain 1A	protein coding gene	ENSMUSG00000029270
P35_CB	Fam71e1	current symbol	Fam71e1	-1.74804	1.60067	2.14e-05	0.000173976	family with sequence similarity 71, member E1	protein coding gene	ENSMUSG00000051113
P35_CB	Fam76b	current symbol	Fam76b	-1.18567	5.19859	4.99e-22	4.26e-20	family with sequence similarity 76, member B	protein coding gene	ENSMUSG00000037808
P35_CB	Fam78b	current symbol	Fam78b	0.352666	6.03333	0.000308645	0.00175133	family with sequence similarity 78, member B	protein coding gene	ENSMUSG00000060568
P35_CB	Fam81a	current symbol	Fam81a	-0.664279	4.01858	0.000132117	0.000848597	family with sequence similarity 81, member A	protein coding gene	ENSMUSG00000032224
P35_CB	Fam82a1	old symbol	Rmdn2	-0.715206	3.01404	0.00303042	0.0119848	regulator of microtubule dynamics 2	protein coding gene	ENSMUSG00000036368
P35_CB	Fam82b	old symbol	Rmdn1	-0.945997	3.83273	3.12e-07	4.09e-06	regulator of microtubule dynamics 1	protein coding gene	ENSMUSG00000028229
P35_CB	Fam92a	current symbol	Fam92a	-0.422131	5.12057	0.000626487	0.00320542	family with sequence similarity 92, member A	protein coding gene	ENSMUSG00000028218
P35_CB	Fam98b	current symbol	Fam98b	0.335042	5.23917	0.00532604	0.0191891	family with sequence similarity 98, member B	protein coding gene	ENSMUSG00000027349
P35_CB	Fancg	current symbol	Fancg	-0.70113	4.04591	3.43e-05	0.000263521	Fanconi anemia, complementation group G	protein coding gene	ENSMUSG00000028453
P35_CB	Fancm	current symbol	Fancm	-0.431783	4.74704	0.00167601	0.00730553	Fanconi anemia, complementation group M	protein coding gene	ENSMUSG00000055884
P35_CB	Far1	current symbol	Far1	-0.743794	6.34151	1.81e-15	9.19e-14	fatty acyl CoA reductase 1	protein coding gene	ENSMUSG00000030759
P35_CB	Fasn	current symbol	Fasn	0.712699	8.1645	2.42e-15	1.21e-13	fatty acid synthase	protein coding gene	ENSMUSG00000025153
P35_CB	Fastk	current symbol	Fastk	-0.50665	6.12159	2e-07	2.73e-06	Fas-activated serine/threonine kinase	protein coding gene	ENSMUSG00000028959
P35_CB	Fastkd2	current symbol	Fastkd2	-0.560888	4.38517	0.000205308	0.00122966	FAST kinase domains 2	protein coding gene	ENSMUSG00000025962
P35_CB	Fat1	current symbol	Fat1	0.227535	8.28298	0.0117003	0.0365315	FAT atypical cadherin 1	protein coding gene	ENSMUSG00000070047
P35_CB	Fat2	current symbol	Fat2	0.409912	9.91463	3.72e-05	0.000283509	FAT atypical cadherin 2	protein coding gene	ENSMUSG00000055333
P35_HC	Fat2	current symbol	Fat2	2.3056	2.00907	9.25e-06	0.00163601	FAT atypical cadherin 2	protein coding gene	ENSMUSG00000055333
P35_CB	Fau	current symbol	Fau	0.426372	6.6047	2.3e-06	2.45e-05	Finkel-Biskis-Reilly murine sarcoma virus (FBR-MuSV) ubiquitously expressed (fox derived)	protein coding gene	ENSMUSG00000038274
P14_HC	Fbf1	current symbol	Fbf1	-0.354781	6.48869	0.000913484	0.0257632	Fas (TNFRSF6) binding factor 1	protein coding gene	ENSMUSG00000020776
P35_CB	Fbf1	current symbol	Fbf1	-0.253475	5.80689	0.0137325	0.0413262	Fas (TNFRSF6) binding factor 1	protein coding gene	ENSMUSG00000020776
P35_CB	Fbl	current symbol	Fbl	0.358222	4.58502	0.0123148	0.0379667	fibrillarin	protein coding gene	ENSMUSG00000046865
P35_CB	Fbll1	current symbol	Fbll1	0.614907	3.72098	0.00148114	0.00659036	fibrillarin-like 1	protein coding gene	ENSMUSG00000051062
P14_HC	Fbln1	current symbol	Fbln1	-0.733101	3.59211	0.000124916	0.00572056	fibulin 1	protein coding gene	ENSMUSG00000006369
P35_CB	Fbln5	current symbol	Fbln5	-0.674898	2.81684	0.00882762	0.0290337	fibulin 5	protein coding gene	ENSMUSG00000021186
P35_CB	Fbln7	current symbol	Fbln7	0.722466	2.88967	0.00322929	0.0126635	fibulin 7	protein coding gene	ENSMUSG00000027386
P35_CB	Fbrsl1	current symbol	Fbrsl1	-0.382507	6.54159	2.78e-05	0.000218621	fibrosin-like 1	protein coding gene	ENSMUSG00000043323
P35_CB	Fbxl12	current symbol	Fbxl12	-0.509744	4.27976	0.0011411	0.00527404	F-box and leucine-rich repeat protein 12	protein coding gene	ENSMUSG00000066892
P35_CB	Fbxl16	current symbol	Fbxl16	0.282718	8.63933	0.00225648	0.00938368	F-box and leucine-rich repeat protein 16	protein coding gene	ENSMUSG00000025738
P35_CB	Fbxl18	current symbol	Fbxl18	0.584649	4.49335	6.29e-05	0.000447123	F-box and leucine-rich repeat protein 18	protein coding gene	ENSMUSG00000066640
P35_CB	Fbxl2	current symbol	Fbxl2	-0.495742	4.06798	0.00291467	0.0116087	F-box and leucine-rich repeat protein 2	protein coding gene	ENSMUSG00000032507
P35_CB	Fbxl20	current symbol	Fbxl20	-0.247458	6.24132	0.00866762	0.0286344	F-box and leucine-rich repeat protein 20	protein coding gene	ENSMUSG00000020883
P35_CB	Fbxl3	current symbol	Fbxl3	-0.478165	7.19378	1.92e-08	3.26e-07	F-box and leucine-rich repeat protein 3	protein coding gene	ENSMUSG00000022124
P35_CB	Fbxl5	current symbol	Fbxl5	-0.320247	7.10995	0.000182715	0.00111263	F-box and leucine-rich repeat protein 5	protein coding gene	ENSMUSG00000039753
P35_CB	Fbxl6	current symbol	Fbxl6	-0.545411	4.63728	0.000110556	0.000732441	F-box and leucine-rich repeat protein 6	protein coding gene	ENSMUSG00000022559
P35_CB	Fbxo10	current symbol	Fbxo10	0.379949	4.79966	0.00443794	0.0165237	F-box protein 10	protein coding gene	ENSMUSG00000048232
P35_CB	Fbxo21	current symbol	Fbxo21	0.490976	7.28343	8.5e-09	1.56e-07	F-box protein 21	protein coding gene	ENSMUSG00000032898
P35_CB	Fbxo25	current symbol	Fbxo25	0.314438	5.53154	0.00449193	0.0166924	F-box protein 25	protein coding gene	ENSMUSG00000038365
P35_CB	Fbxo27	current symbol	Fbxo27	-0.812574	4.38052	8.66e-08	1.3e-06	F-box protein 27	protein coding gene	ENSMUSG00000037463
P35_CB	Fbxo30	current symbol	Fbxo30	-0.590161	4.20308	0.000297737	0.00169657	F-box protein 30	protein coding gene	ENSMUSG00000047648
P35_CB	Fbxo30	old symbol	Fbxw7	-0.590161	4.20308	0.000297737	0.00169657	F-box and WD-40 domain protein 7	protein coding gene	ENSMUSG00000028086
P35_CB	Fbxo31	current symbol	Fbxo31	0.293619	5.51809	0.0077509	0.0261899	F-box protein 31	protein coding gene	ENSMUSG00000052934
P35_CB	Fbxo34	current symbol	Fbxo34	0.445273	5.05668	0.000349734	0.00195324	F-box protein 34	protein coding gene	ENSMUSG00000037536
P35_CB	Fbxo41	current symbol	Fbxo41	0.300114	6.70891	0.000677912	0.00342608	F-box protein 41	protein coding gene	ENSMUSG00000047013
P35_CB	Fbxo42	current symbol	Fbxo42	0.327432	5.70334	0.0020874	0.00881099	F-box protein 42	protein coding gene	ENSMUSG00000028920
P35_CB	Fbxo45	current symbol	Fbxo45	0.254743	6.65095	0.00430144	0.0161044	F-box protein 45	protein coding gene	ENSMUSG00000035764
P35_CB	Fbxo46	current symbol	Fbxo46	0.591893	3.13255	0.0086483	0.0285845	F-box protein 46	protein coding gene	ENSMUSG00000050428
P35_CB	Fbxo5	current symbol	Fbxo5	-0.818904	2.14283	0.0112416	0.035378	F-box protein 5	protein coding gene	ENSMUSG00000019773
P35_CB	Fbxo8	current symbol	Fbxo8	-0.562464	5.13915	4.45e-06	4.39e-05	F-box protein 8	protein coding gene	ENSMUSG00000038206
P35_CB	Fbxw2	current symbol	Fbxw2	-0.239851	6.23519	0.0122232	0.0377793	F-box and WD-40 domain protein 2	protein coding gene	ENSMUSG00000035949
P35_CB	Fbxw8	current symbol	Fbxw8	0.282115	6.54538	0.00190671	0.00814986	F-box and WD-40 domain protein 8	protein coding gene	ENSMUSG00000032867
P14_HC	Fcho1	current symbol	Fcho1	-0.374316	6.02145	0.000753969	0.0224508	FCH domain only 1	protein coding gene	ENSMUSG00000070000
P35_CB	Fcho1	current symbol	Fcho1	-0.479874	5.44694	2.25e-05	0.000181572	FCH domain only 1	protein coding gene	ENSMUSG00000070000
P35_CB	Fcho2	current symbol	Fcho2	-0.922351	5.4471	5.42e-16	2.92e-14	FCH domain only 2	protein coding gene	ENSMUSG00000041685
P14_CB	Fchsd1	current symbol	Fchsd1	-0.758835	3.44766	1.29e-06	0.000175528	FCH and double SH3 domains 1	protein coding gene	ENSMUSG00000038524
P35_CB	Fdft1	current symbol	Fdft1	0.341031	6.0892	0.000448018	0.00241607	farnesyl diphosphate farnesyl transferase 1	protein coding gene	ENSMUSG00000021273
P35_CB	Fdps	current symbol	Fdps	0.397832	5.58905	0.000260787	0.00151223	farnesyl diphosphate synthetase	protein coding gene	ENSMUSG00000059743
P35_CB	Fem1b	current symbol	Fem1b	0.365251	7.59689	2.48e-05	0.000198176	feminization 1 homolog b (C. elegans)	protein coding gene	ENSMUSG00000032244
P35_CB	Fez1	current symbol	Fez1	0.298147	8.30248	0.000985615	0.00469365	fasciculation and elongation protein zeta 1 (zygin I)	protein coding gene	ENSMUSG00000032118
P35_CB	Fgd5	current symbol	Fgd5	-1.04867	2.15206	0.000921249	0.00443265	FYVE, RhoGEF and PH domain containing 5	protein coding gene	ENSMUSG00000034037
P14_CB	Fgf1	current symbol	Fgf1	-0.309676	6.52478	0.000681627	0.0348387	fibroblast growth factor 1	protein coding gene	ENSMUSG00000036585
P35_CB	Fgf1	current symbol	Fgf1	0.218096	7.06929	0.0111781	0.0352191	fibroblast growth factor 1	protein coding gene	ENSMUSG00000036585
P35_CB	Fgf7	current symbol	Fgf7	0.531329	4.39825	0.000353376	0.00196787	fibroblast growth factor 7	protein coding gene	ENSMUSG00000027208
P35_CB	Fgfbp3	current symbol	Fgfbp3	-1.25029	3.60666	4.57e-10	1.02e-08	fibroblast growth factor binding protein 3	protein coding gene	ENSMUSG00000047632
P35_CB	Fgfr1op2	current symbol	Fgfr1op2	-0.3222	6.24318	0.000663559	0.00336826	FGFR1 oncogene partner 2	protein coding gene	ENSMUSG00000040242
P14_HC	Fgfr3	current symbol	Fgfr3	-0.408081	7.15936	0.000102536	0.00484457	fibroblast growth factor receptor 3	protein coding gene	ENSMUSG00000054252
P14_CB	Fgfr3	current symbol	Fgfr3	-0.393455	5.78355	4.94e-05	0.00413496	fibroblast growth factor receptor 3	protein coding gene	ENSMUSG00000054252
P35_CB	Fhod1	current symbol	Fhod1	-0.908256	3.93931	2.66e-07	3.54e-06	formin homology 2 domain containing 1	protein coding gene	ENSMUSG00000014778
P35_HC	Figf	old symbol	Vegfd	1.98256	1.92525	8.6e-05	0.0105951	vascular endothelial growth factor D	protein coding gene	ENSMUSG00000031380
P35_CB	Fiz1	current symbol	Fiz1	0.330764	4.90522	0.0116361	0.0363816	Flt3 interacting zinc finger protein 1	protein coding gene	ENSMUSG00000061374
P35_CB	Fkbp1a	current symbol	Fkbp1a	0.344848	8.08139	0.000110999	0.000735013	FK506 binding protein 1a	protein coding gene	ENSMUSG00000032966
P35_CB	Fkbp3	current symbol	Fkbp3	-0.345508	6.52868	0.000137885	0.000877699	FK506 binding protein 3	protein coding gene	ENSMUSG00000020949
P35_CB	Fkbp4	current symbol	Fkbp4	0.529222	8.08953	3.22e-09	6.36e-08	FK506 binding protein 4	protein coding gene	ENSMUSG00000030357
P14_HC	Fkbp5	current symbol	Fkbp5	-0.689097	6.00229	7.07e-10	1.78e-07	FK506 binding protein 5	protein coding gene	ENSMUSG00000024222
P14_CB	Fkbp5	current symbol	Fkbp5	-1.12713	4.53864	5.3e-20	3.05e-17	FK506 binding protein 5	protein coding gene	ENSMUSG00000024222
P35_CB	Fkbp5	current symbol	Fkbp5	0.546134	3.89215	0.00220792	0.00921869	FK506 binding protein 5	protein coding gene	ENSMUSG00000024222
P35_CB	Fkbpl	current symbol	Fkbpl	0.748123	2.44985	0.0111687	0.0352061	FK506 binding protein-like	protein coding gene	ENSMUSG00000033739
P35_CB	Fktn	current symbol	Fktn	-0.302716	5.32738	0.00862536	0.0285297	fukutin	protein coding gene	ENSMUSG00000028414
P35_CB	Fli1	current symbol	Fli1	-1.17673	1.40338	0.00481951	0.0177145	Friend leukemia integration 1	protein coding gene	ENSMUSG00000016087
P35_CB	Flii	current symbol	Flii	0.260422	6.32586	0.00590704	0.0209245	flightless I actin binding protein	protein coding gene	ENSMUSG00000002812
P35_CB	Flna	current symbol	Flna	-1.16196	6.72885	1.29e-38	2.76e-36	filamin, alpha	protein coding gene	ENSMUSG00000031328
P35_CB	Flnb	current symbol	Flnb	-0.764076	6.23102	1.43e-15	7.37e-14	filamin, beta	protein coding gene	ENSMUSG00000025278
P35_CB	Flot1	current symbol	Flot1	0.25351	5.82459	0.0134812	0.0407336	flotillin 1	protein coding gene	ENSMUSG00000059714
P35_CB	Flot2	current symbol	Flot2	0.28682	6.524	0.00162455	0.00711803	flotillin 2	protein coding gene	ENSMUSG00000061981
P35_CB	Flrt1	current symbol	Flrt1	0.437934	4.21275	0.00571407	0.0203425	fibronectin leucine rich transmembrane protein 1	protein coding gene	ENSMUSG00000047787
P35_CB	Flrt2	current symbol	Flrt2	-0.664089	4.07417	9.5e-05	0.000640027	fibronectin leucine rich transmembrane protein 2	protein coding gene	ENSMUSG00000047414
P35_CB	Flt1	current symbol	Flt1	-0.477443	4.89666	0.000236268	0.00138978	FMS-like tyrosine kinase 1	protein coding gene	ENSMUSG00000029648
P35_CB	Flt3l	current symbol	Flt3l	-2.42781	1.63287	6.2e-09	1.17e-07	FMS-like tyrosine kinase 3 ligand	protein coding gene	ENSMUSG00000110206
P35_CB	Flywch1	current symbol	Flywch1	0.371656	7.77597	2.12e-05	0.000172441	FLYWCH-type zinc finger 1	protein coding gene	ENSMUSG00000040097
P35_CB	Fmr1	current symbol	Fmr1	-0.346351	6.56564	0.000118796	0.0007771	fragile X mental retardation 1	protein coding gene	ENSMUSG00000000838
P35_CB	Fnbp1l	current symbol	Fnbp1l	-0.589777	4.90132	5.86e-06	5.57e-05	formin binding protein 1-like	protein coding gene	ENSMUSG00000039735
P35_CB	Fnbp4	current symbol	Fnbp4	-0.917024	6.34211	1.63e-22	1.41e-20	formin binding protein 4	protein coding gene	ENSMUSG00000008200
P14_HC	Fndc1	current symbol	Fndc1	-1.0067	3.79501	3.31e-08	5.59e-06	fibronectin type III domain containing 1	protein coding gene	ENSMUSG00000071984
P35_CB	Fndc8	current symbol	Fndc8	-1.11843	1.27609	0.0106881	0.0340734	fibronectin type III domain containing 8	protein coding gene	ENSMUSG00000018844
P35_CB	Fnip1	current symbol	Fnip1	-0.404964	6.44507	1.07e-05	9.46e-05	folliculin interacting protein 1	protein coding gene	ENSMUSG00000035992
P35_CB	Fntb	current symbol	Fntb	0.465372	5.70259	1.08e-05	9.55e-05	farnesyltransferase, CAAX box, beta	protein coding gene	ENSMUSG00000033373
P14_HC	Folr1	current symbol	Folr1	1.55609	2.36964	6.94e-09	1.36e-06	folate receptor 1 (adult)	protein coding gene	ENSMUSG00000001827
P35_CB	Folr1	current symbol	Folr1	-2.3615	2.37397	2.42e-13	9.28e-12	folate receptor 1 (adult)	protein coding gene	ENSMUSG00000001827
P35_HC	Folr1	current symbol	Folr1	4.009	2.76533	8.72e-17	1.2e-13	folate receptor 1 (adult)	protein coding gene	ENSMUSG00000001827
P14_HC	Fos	current symbol	Fos	0.64271	4.39099	3.47e-05	0.00205818	FBJ osteosarcoma oncogene	protein coding gene	ENSMUSG00000021250
P14_CB	Fos	current symbol	Fos	1.48274	3.65205	1.93e-21	1.21e-18	FBJ osteosarcoma oncogene	protein coding gene	ENSMUSG00000021250
P35_CB	Fos	current symbol	Fos	1.33263	5.99713	1.78e-38	3.74e-36	FBJ osteosarcoma oncogene	protein coding gene	ENSMUSG00000021250
P35_HC	Fos	current symbol	Fos	1.4141	5.35358	1.23e-14	1.21e-11	FBJ osteosarcoma oncogene	protein coding gene	ENSMUSG00000021250
P35_CB	Fosb	current symbol	Fosb	2.42433	1.64249	6.04e-09	1.14e-07	FBJ osteosarcoma oncogene B	protein coding gene	ENSMUSG00000003545
P35_HC	Fosb	current symbol	Fosb	1.1306	3.95398	2.13e-05	0.0034664	FBJ osteosarcoma oncogene B	protein coding gene	ENSMUSG00000003545
P35_CB	Fosl2	current symbol	Fosl2	1.58857	4.55998	3.96e-26	4.38e-24	fos-like antigen 2	protein coding gene	ENSMUSG00000029135
P35_CB	Foxd1	current symbol	Foxd1	-1.15147	1.38	0.00423968	0.0159174	forkhead box D1	protein coding gene	ENSMUSG00000078302
P14_HC	Foxj1	current symbol	Foxj1	0.91172	3.74665	7.91e-07	8.78e-05	forkhead box J1	protein coding gene	ENSMUSG00000034227
P35_CB	Foxj2	current symbol	Foxj2	0.414129	6.09586	2.46e-05	0.000196704	forkhead box J2	protein coding gene	ENSMUSG00000003154
P35_CB	Foxj3	current symbol	Foxj3	0.368852	6.28872	8.7e-05	0.000591289	forkhead box J3	protein coding gene	ENSMUSG00000032998
P35_CB	Foxk1	current symbol	Foxk1	0.430126	6.11586	1.04e-05	9.21e-05	forkhead box K1	protein coding gene	ENSMUSG00000056493
P35_HC	Foxk1	current symbol	Foxk1	-0.578696	6.16808	0.000222305	0.022353	forkhead box K1	protein coding gene	ENSMUSG00000056493
P35_CB	Foxo1	current symbol	Foxo1	0.563547	5.03016	7.04e-06	6.59e-05	forkhead box O1	protein coding gene	ENSMUSG00000044167
P35_CB	Foxo3	current symbol	Foxo3	0.62848	6.69715	1.76e-12	5.85e-11	forkhead box O3	protein coding gene	ENSMUSG00000048756
P14_HC	Foxp1	current symbol	Foxp1	0.488664	4.38552	0.00170274	0.0415242	forkhead box P1	protein coding gene	ENSMUSG00000030067
P35_CB	Foxp4	current symbol	Foxp4	0.450162	6.2092	2.49e-06	2.64e-05	forkhead box P4	protein coding gene	ENSMUSG00000023991
P35_CB	Foxred2	current symbol	Foxred2	-0.320181	5.52565	0.00381137	0.0145566	FAD-dependent oxidoreductase domain containing 2	protein coding gene	ENSMUSG00000016552
P35_CB	Fpgs	current symbol	Fpgs	-0.915548	2.84438	0.000407758	0.00223108	folylpolyglutamyl synthetase	protein coding gene	ENSMUSG00000009566
P35_CB	Frat1	current symbol	Frat1	0.359602	4.49203	0.0123232	0.0379752	frequently rearranged in advanced T cell lymphomas	protein coding gene	ENSMUSG00000067199
P35_CB	Frem1	current symbol	Frem1	-0.939257	3.39772	1e-05	8.94e-05	Fras1 related extracellular matrix protein 1	protein coding gene	ENSMUSG00000059049
P35_CB	Frmd3	current symbol	Frmd3	-0.569288	3.35333	0.00870571	0.028732	FERM domain containing 3	protein coding gene	ENSMUSG00000049122
P14_HC	Frmpd1	current symbol	Frmpd1	-0.643843	4.22848	6.4e-05	0.00336174	FERM and PDZ domain containing 1	protein coding gene	ENSMUSG00000035615
P14_CB	Frmpd1	current symbol	Frmpd1	-0.966719	4.12179	7.65e-13	3.02e-10	FERM and PDZ domain containing 1	protein coding gene	ENSMUSG00000035615
P35_CB	Frmpd3	current symbol	Frmpd3	-0.758117	3.79402	3.46e-05	0.000265783	FERM and PDZ domain containing 3	protein coding gene	ENSMUSG00000042425
P14_CB	Frmpd4	current symbol	Frmpd4	-0.308356	6.3802	0.000767491	0.0385981	FERM and PDZ domain containing 4	protein coding gene	ENSMUSG00000049176
P35_CB	Frmpd4	current symbol	Frmpd4	-0.45836	6.87126	1.39e-07	2e-06	FERM and PDZ domain containing 4	protein coding gene	ENSMUSG00000049176
P35_CB	Fry	current symbol	Fry	0.834272	7.64537	1.1e-21	9.2e-20	FRY microtubule binding protein	protein coding gene	ENSMUSG00000056602
P35_CB	Fscn1	current symbol	Fscn1	0.474421	6.06188	1.32e-06	1.49e-05	fascin actin-bundling protein 1	protein coding gene	ENSMUSG00000029581
P14_CB	Fstl5	current symbol	Fstl5	0.502461	5.76853	2.45e-07	3.94e-05	follistatin-like 5	protein coding gene	ENSMUSG00000034098
P35_CB	Fto	current symbol	Fto	0.589444	7.84177	2.13e-11	6.13e-10	fat mass and obesity associated	protein coding gene	ENSMUSG00000055932
[truncated: 3,562 more rows]
